# Supplementary material for: Implementation of consensus-based perioperative care pathways to reduce clinical variation for elective surgery in an Australian private hospital: a mixed-methods pre–post study protocol
Source: PubMed Central journal article supplement — BMJ Open. 2023 Jul 26;13(7):e075008. doi: 10.1136/bmjopen-2023-075008 (PMC10373689; doi:10.1136/bmjopen-2023-075008), 2023-07-26
Supplement: bmjopen-2023-075008.draft_revisions.pdf [file bmjopen-2023-075008.draft_revisions.pdf]

# BMJ Open

BMJ Open is committed to open peer review. As part of this commitment we make the peer review history of every article we publish publicly available.

When an article is published we post the peer reviewers' comments and the authors' responses online. We also post the versions of the paper that were used during peer review. These are the versions that the peer review comments apply to.

The versions of the paper that follow are the versions that were submitted during the peer review process. They are not the versions of record or the final published versions. They should not be cited or distributed as the published version of this manuscript.

BMJ Open is an open access journal and the full, final, typeset and author-corrected version of record of the manuscript is available on our site with no access controls, subscription charges or pay-per-view fees (<http://bmjopen.bmj.com>).

If you have any questions on BMJ Open's open peer review process please email [info.bmjopen@bmj.com](mailto:info.bmjopen@bmj.com)

# BMJ Open

## IMPLEMENTATION OF CONSENSUS-BASED PERIOPERATIVE CARE PATHWAYS TO REDUCE CLINICAL VARIATION IN ELECTIVE SURGERY: A MIXED METHODS PRE-POST STUDY PROTOCOL

|                               |                                                                                                                                                                                                                                                                                                                                                                                                                                                                                                                                                                                                                                                                                                                                                                                                                                                                                                                                                                                                                                                                                                                                                                                                                                                                                                                                                                                                                                                                                                                                                                                                                                                                                                                                                                                                                                                                                                                                                                                                                                                                                                                                                                                                                                                                                                                                                                                                                                                           |
|-------------------------------|-----------------------------------------------------------------------------------------------------------------------------------------------------------------------------------------------------------------------------------------------------------------------------------------------------------------------------------------------------------------------------------------------------------------------------------------------------------------------------------------------------------------------------------------------------------------------------------------------------------------------------------------------------------------------------------------------------------------------------------------------------------------------------------------------------------------------------------------------------------------------------------------------------------------------------------------------------------------------------------------------------------------------------------------------------------------------------------------------------------------------------------------------------------------------------------------------------------------------------------------------------------------------------------------------------------------------------------------------------------------------------------------------------------------------------------------------------------------------------------------------------------------------------------------------------------------------------------------------------------------------------------------------------------------------------------------------------------------------------------------------------------------------------------------------------------------------------------------------------------------------------------------------------------------------------------------------------------------------------------------------------------------------------------------------------------------------------------------------------------------------------------------------------------------------------------------------------------------------------------------------------------------------------------------------------------------------------------------------------------------------------------------------------------------------------------------------------------|
| Journal:                      | <i>BMJ Open</i>                                                                                                                                                                                                                                                                                                                                                                                                                                                                                                                                                                                                                                                                                                                                                                                                                                                                                                                                                                                                                                                                                                                                                                                                                                                                                                                                                                                                                                                                                                                                                                                                                                                                                                                                                                                                                                                                                                                                                                                                                                                                                                                                                                                                                                                                                                                                                                                                                                           |
| Manuscript ID                 | bmjopen-2023-075008                                                                                                                                                                                                                                                                                                                                                                                                                                                                                                                                                                                                                                                                                                                                                                                                                                                                                                                                                                                                                                                                                                                                                                                                                                                                                                                                                                                                                                                                                                                                                                                                                                                                                                                                                                                                                                                                                                                                                                                                                                                                                                                                                                                                                                                                                                                                                                                                                                       |
| Article Type:                 | Protocol                                                                                                                                                                                                                                                                                                                                                                                                                                                                                                                                                                                                                                                                                                                                                                                                                                                                                                                                                                                                                                                                                                                                                                                                                                                                                                                                                                                                                                                                                                                                                                                                                                                                                                                                                                                                                                                                                                                                                                                                                                                                                                                                                                                                                                                                                                                                                                                                                                                  |
| Date Submitted by the Author: | 24-Apr-2023                                                                                                                                                                                                                                                                                                                                                                                                                                                                                                                                                                                                                                                                                                                                                                                                                                                                                                                                                                                                                                                                                                                                                                                                                                                                                                                                                                                                                                                                                                                                                                                                                                                                                                                                                                                                                                                                                                                                                                                                                                                                                                                                                                                                                                                                                                                                                                                                                                               |
| Complete List of Authors:     | <p>Pagano, Lisa; Macquarie University Faculty of Medicine Health and Human Sciences, Australian Institute of Health Innovation<br/> Hemmert, Cameron; The University of Sydney Faculty of Medicine and Health, School of Health Sciences<br/> Hirschhorn, Andrew; Macquarie University Faculty of Medicine Health and Human Sciences, MQ Health<br/> Francis-Auton, Emilie; Macquarie University Faculty of Medicine Health and Human Sciences, Australian Institute of Health Innovation<br/> Arnolda, Gaston; Macquarie University Faculty of Medicine Health and Human Sciences, Australian Institute of Health Innovation<br/> Long, Janet; Macquarie University Faculty of Medicine Health and Human Sciences, Australian Institute of Health Innovation<br/> Braithwaite, Jeffrey; Macquarie University Faculty of Medicine Health and Human Sciences, Australian Institute of Health Innovation<br/> Gumley, Graham; Macquarie University Faculty of Medicine Health and Human Sciences, MQ Health<br/> Hibbert, Peter; Macquarie University Faculty of Medicine Health and Human Sciences, Australian Institute of Health Innovation; University of South Australia Allied Health and Human Performance, IIMPACT in Health<br/> Churruca, Kate; Macquarie University Faculty of Medicine Health and Human Sciences, Australian Institute of Health Innovation<br/> Hutchinson, Karen; Macquarie University Faculty of Medicine Health and Human Sciences, Australian Institute of Health Innovation<br/> Partington, Andrew; Flinders University, Flinders Health and Medical Research Institute; Macquarie University Faculty of Medicine Health and Human Sciences, Australian Institute of Health Innovation<br/> Hughes, Clifford; Macquarie University Faculty of Medicine Health and Human Sciences, Australian Institute of Health Innovation; Macquarie University Faculty of Medicine Health and Human Sciences, MQ Health<br/> Gillatt, David; Macquarie University Faculty of Medicine Health and Human Sciences, MQ Health<br/> Ellis, Louise A.; Macquarie University Faculty of Medicine Health and Human Sciences, Australian Institute of Health Innovation<br/> Testa, Luke; Macquarie University Faculty of Medicine Health and Human Sciences, Australian Institute of Health Innovation<br/> Patel, Romika; Macquarie University Faculty of Medicine Health and Human Sciences, Australian Institute of Health Innovation</p> |

1  
2  
3  
4  
5  
6  
7  
8  
9  
10  
11  
12  
13  
14  
15  
16  
17  
18  
19  
20  
21  
22  
23  
24  
25  
26  
27  
28  
29  
30  
31  
32  
33  
34  
35  
36  
37  
38  
39  
40  
41  
42  
43  
44  
45  
46  
47  
48  
49  
50  
51  
52  
53  
54  
55  
56  
57  
58  
59  
60

|           |                                                                                                                                                                                                                                                        |
|-----------|--------------------------------------------------------------------------------------------------------------------------------------------------------------------------------------------------------------------------------------------------------|
|           | Sarkies, Mitchell N; The University of Sydney Faculty of Medicine and Health, School of Health Sciences; Macquarie University Faculty of Medicine Health and Human Sciences, Australian Institute of Health Innovation                                 |
| Keywords: | Adult anaesthesia < ANAESTHETICS, Change management < HEALTH SERVICES ADMINISTRATION & MANAGEMENT, Protocols & guidelines < HEALTH SERVICES ADMINISTRATION & MANAGEMENT, Quality in health care < HEALTH SERVICES ADMINISTRATION & MANAGEMENT, SURGERY |
|           |                                                                                                                                                                                                                                                        |

SCHOLARONE™  
Manuscripts

1  
2  
3 **IMPLEMENTATION OF CONSENSUS-BASED PERIOPERATIVE CARE**  
4  
5 **PATHWAYS TO REDUCE CLINICAL VARIATION IN ELECTIVE SURGERY: A**  
6  
7 **MIXED METHODS PRE-POST STUDY PROTOCOL**  
8  
9

10  
11 **AUTHORS:**  
12

13  
14 **Lisa Pagano<sup>1</sup>, Cameron Hemmert<sup>2</sup>, Andrew Hirschhorn<sup>3</sup>, Emilie Francis-Auton<sup>1</sup>,**  
15  
16 **Gaston Arnolda<sup>1</sup>, Janet C Long<sup>1</sup>, Jeffrey Braithwaite<sup>1</sup>, Graham Gumley<sup>3</sup>, Peter D**  
17  
18 **Hibbert<sup>1,4</sup>, Kate Churruca<sup>1</sup>, Karen Hutchinson<sup>1</sup>, Andrew Partington<sup>5,1</sup>, Cliff Hughes<sup>1,3</sup>,**  
19  
20 **David Gillatt<sup>3</sup>, Louise A Ellis<sup>1</sup>, Luke Testa<sup>1</sup>, Romika Patel<sup>1</sup>, Mitchell Sarkies<sup>2,1</sup>**  
21  
22

23  
24  
25 **AFFILIATIONS:**  
26

- 27  
28  
29 1. Australian Institute of Health Innovation, Faculty of Medicine, Health and Human  
30  
31 Sciences, Macquarie University  
32  
33 2. School of Health Sciences, Faculty of Medicine and Health, University of Sydney  
34  
35 3. MQ Health, Faculty of Medicine, Health and Human Sciences, Macquarie University  
36  
37 4. IIMPACT in Health, Allied Health and Human Performance, University of South  
38  
39 Australia  
40  
41  
42 5. Flinders Health and Medical Research Institute, Flinders University  
43  
44

45  
46 **CORRESPONDING AUTHOR:**  
47

48 Lisa Pagano  
49

50 Australian Institute of Health Innovation  
51

52 Faculty of Medicine, Health and Human Sciences  
53

54 Level 6, 75 Talavera Road  
55

56 Macquarie University, NSW 2109, Australia  
57

58 Telephone: +61 (2) 9850 2448  
59  
60

Email: lisa.pagano@mq.edu.au

## ABSTRACT

**Introduction:** Addressing clinical variation in elective surgery is challenging. A key issue is how to gain consensus between largely autonomous clinicians. Understanding how the consensus process works to develop and implement perioperative pathways and the impact of these pathways on reducing clinical variation can provide important insights into the effectiveness of the consensus process. The primary objective of this study is to understand the implementation of an organisationally supported, consensus approach to implement perioperative care pathways in a private healthcare facility and to determine its impact.

**Methods:** A mixed-methods Effectiveness-Implementation Hybrid (Type III) pre-post study will be conducted in one Australian private hospital. Five new consensus-based perioperative care pathways will be developed and implemented for specific patient cohorts: spinal surgery, radical prostatectomy, cardiac surgery, bariatric surgery and total hip and knee replacement. The individual components of these pathways will be confirmed as part of a consensus-building approach and will follow a four-stage implementation process using the Exploration, Preparation, Implementation, and Sustainment (EPIS) framework. The process of implementation, as well as barriers and facilitators, will be evaluated through semi-structured interviews and focus groups with key clinical and non-clinical staff, and participant observation. Administrative and clinical end-points will be analysed to assess the effectiveness of the pathways.

**Discussion:** This project proposes a facility-specific approach to perioperative care pathway development and implementation to reduce variation which could be extended to hospitals across Australia and internationally. The results of this study will contribute to the current

1  
2  
3 knowledge base about the factors that impact on effective implementation of perioperative  
4  
5 pathways via a consensus approach.  
6  
7

8  
9 **Ethics and dissemination:** This study received ethical approval from Macquarie University  
10  
11 Human Research Ethics Medical Sciences Committee (Reference No: 520221219542374).

12  
13 The findings of this study will be disseminated through peer-reviewed publications,  
14  
15 conference presentations, and reports for key stakeholders.  
16  
17

18  
19 **Keywords:** Implementation Science, Clinical variation, Perioperative pathways, Consensus,  
20  
21 Elective surgery, Private providers  
22  
23

#### 24 25 **Strengths and Limitations:**

- 26  
27 • This study will provide valuable insights into the effectiveness of the consensus-  
28  
29 building process to guide the implementation of standardised perioperative pathways  
30  
31 in a real-world setting, potentially enabling generalisability to other contexts.  
32  
33
- 34  
35 • Investigation of the consensus-based approach to clinical variation is novel.  
36  
37
- 38  
39 • Multiple forms of qualitative data collection will be used to ensure rigour and a  
40  
41 diverse range of perspectives will be gathered. This will provide a deeper  
42  
43 understanding of the experiences of implementation at different time periods across  
44  
45 multiple surgical cohorts, as well as barriers and facilitators to adopting new  
46  
47 standardised processes of care.  
48  
49
- 50  
51 • The pragmatic nature of the study will deliberately make use of existing practice  
52  
53 structures and approaches to implement the consensus pathways and to obtain patient-  
54  
55 related outcomes. This, however, limits pre/post comparison of some clinical  
56  
57 outcomes to a smaller sample size from one surgical cohort only.  
58  
59

## 60 **INTRODUCTION**

1  
2  
3 Addressing clinical variation is a fundamental component of health system improvement.  
4  
5 Whilst in some circumstances variation can be beneficial (e.g., when it represents innovation,  
6  
7 or responses to individual patient need or preference), variation in healthcare processes that  
8  
9 are unrelated to patient needs or those that differ from evidence-informed guidelines can  
10  
11 compromise patient care, create inefficiencies, and contribute to health inequality (1, 2). This  
12  
13 is a growing problem both in Australia and internationally, where on average, 60% of  
14  
15 recommended care according to best practice guidelines is delivered to patients (3, 4, 5, 6). In  
16  
17 addition, 30% of all care provided could be considered “low value” or waste, and 10% results  
18  
19 in some form of iatrogenic harm (1, 4, 5). For example, care processes and outcomes for  
20  
21 certain surgical patient cohorts have been found to differ substantially between hospitals in  
22  
23 both public and private sectors (7). Data from Australia and the United States of America  
24  
25 (USA) demonstrate a high degree of variation in length of stay (LOS), rates of transfer to  
26  
27 inpatient rehabilitation following hip and knee arthroplasty (8), and specific to private  
28  
29 hospitals, higher unplanned stay (>2 hours) in recovery after surgery (7). Considering the  
30  
31 increasing number of elective surgeries and associated hospitalisations undertaken in private  
32  
33 hospitals in Australia (9) and elsewhere (10, 11, 12) reducing unwarranted clinical variation  
34  
35 in these settings is critical to generating higher value care, improving patient outcomes, and  
36  
37 reducing healthcare expenditure.  
38  
39  
40  
41  
42  
43  
44

45 A number of studies have examined ways to reduce unwarranted clinical variation, such as  
46  
47 through the implementation of perioperative care pathways for surgical cohorts (13, 14, 15).  
48  
49 However, despite many studies demonstrating the efficacy of some strategies in reducing  
50  
51 variation, the optimal methods of developing and implementing such strategies into complex  
52  
53 healthcare systems remain unclear. More evidence is needed on how best to implement and  
54  
55 sustain these changes, as well as the barriers and facilitators to different methods of  
56  
57 implementation to reduce unwarranted variation.  
58  
59  
60

1  
2  
3 Evidence-informed perioperative care pathways designed to standardise the management of  
4 surgical patients to the best evidence-informed practice have been shown to reduce variation  
5 and improve patient outcomes (16). Perioperative care refers to the care of patients before,  
6 during, and after surgical procedures involving anaesthesia (17). Care leading up to a surgical  
7 procedure involves the reduction of modifiable risks, often in a preoperative clinic, through  
8 patient education, medication optimisation, and other prophylactic treatments. After surgery,  
9 the focus is on expediting recovery and minimising the risk of complications by optimising  
10 such things as pain relief, antibiotic regimens to reduce infection risks, anticoagulation  
11 protocols to avoid blood clotting, and early mobility to return to normal function. Private  
12 hospitals in most countries have historically relied on accredited medical practitioners to  
13 individually develop their own perioperative care protocols using a combination of their  
14 experience, past practice, and clinical practice guidelines (18). Such protocols, when  
15 implemented as frontline care, can create variation in care delivery based on provider  
16 preferences.

17  
18  
19  
20  
21  
22  
23  
24  
25  
26  
27  
28  
29  
30  
31  
32  
33  
34  
35  
36 Implementing changes to patient care is complex and challenging, requiring concerted efforts  
37 over time. This challenge is well documented and usually involves the provision of resources  
38 to support change efforts, shifting professional roles, and altering cultural norms (5). Rather  
39 than a “one size fits all” approach, pathways need to be developed to suit the particular needs  
40 of the patient cohort and surgical discipline, as well as local resources available. However,  
41 there is no universal approach to implementing these pathways. In many private hospitals,  
42 medical practitioners tend to operate with a high degree of professional autonomy, which  
43 necessitates a consensus-building approach between providers for any standardisation of care  
44 processes.

## 55 56 57 58 **Objectives** 59 60



1  
2  
3 The primary objective of this study is to determine successful processes to implementing  
4 perioperative care pathways in a private hospital setting using an organisationally supported  
5 consensus approach for surgical cohorts, including: i) spinal surgery; ii) radical  
6 prostatectomy; iii) cardiac surgery; iv) bariatric surgery and; v) hip and knee replacement  
7 surgery. The secondary objective is to assess the impact on administrative and, where  
8 possible, clinical and patient-reported outcomes.  
9  
10  
11  
12  
13  
14  
15  
16

## 17 **METHODS**

### 18 **Study design**

19  
20  
21 A mixed-methods Effectiveness-Implementation Hybrid (Type III) pre-post study will be  
22 used to evaluate the implementation of evidence and consensus-based perioperative  
23 pathways, prioritising assessment of effectiveness of the implementation strategies. Whilst  
24 improving clinical outcomes is an important goal of any change process, standardisation of  
25 perioperative pathways has already been demonstrated to confer benefit to clinical outcomes  
26 (13, 19, 20, 21, 22). As such, clinical outcomes will be considered secondary in this study.  
27  
28 The perioperative care pathways will be implemented once consensus has been reached and  
29 outcomes will be compared to those observed before pathway development and integration  
30 into routine care, as a control period.  
31  
32  
33  
34  
35  
36  
37  
38  
39  
40  
41  
42  
43  
44  
45  
46

### 47 **Study Setting**

48  
49  
50 The study will be conducted over a two-year period from October 2022 to December 2024 at  
51 Macquarie University Hospital (MUH). MUH is located in Sydney, Australia and is a  
52 university-owned, private teaching hospital that focusses on clinical care, teaching and  
53 research. MUH comprises 144 beds, 16 operating theatres, and is staffed by over 200  
54 surgeons and other health professionals.  
55  
56  
57  
58  
59  
60

## Eligibility criteria

Hospital staff and patients will be considered as study participants for the surgical cohorts: spinal surgery, radical prostatectomy, cardiac surgery, bariatric surgery and hip and knee replacement surgery. Data from hospital staff participants will primarily be used to examine the implementation of perioperative care pathways. Administrative data and data from consenting prostatectomy patients will be used firstly, to conduct a process evaluation and secondly, to evaluate impacts on patient-related outcomes.

*Hospital staff:* Local hospital staff involved in the delivery of clinical care or development and implementation of care pathways (i.e., both clinicians and non-clinical staff) will be considered eligible to participate in the implementation component of this study.

*Patients:* Those admitted during the relevant study periods, seeking care for any of the clinical cohorts of interest will be considered eligible for this study.

There are no specific exclusion criteria for this study.

## Intervention

Development and implementation of the cohort-specific standardised perioperative pathways will follow a six-step process nested within four implementation stages using the Exploration, Preparation, Implementation, and Sustainment (EPIS) framework (23). The EPIS Framework guides projects through key stages of the implementation process and highlights important factors influencing implementation success within the broader “outer context” (system) and the proximal “inner context” (organisation) across each EPIS stage. The proposed implementation strategies are summarised in Table 1. The general implementation strategies will be tailored to each new patient cohort utilising a consensus-building approach. Our

1  
2  
3 implementation science approach will examine this consensus-building process to support  
4  
5 successful implementation of the pathways.  
6  
7

### 8 9 *Stage 1: Exploration*

10  
11  
12 The exploration stage will aim to understand the existing and emerging needs of both  
13  
14 clinicians and patients, and to identify the optimal modifications and supports required for the  
15  
16 implementation strategy to address those needs. This could include modifications to existing  
17  
18 information technology (IT) processes or the introduction of organisational support and  
19  
20 educational resources for staff members to implement the pathways. To achieve this  
21  
22 objective, a care pathway implementation support team will be established comprising  
23  
24 members of the research team and key hospital stakeholders. Stakeholders will include a  
25  
26 coalition of both clinical partners, such as clinical education coordinators, and non-clinical  
27  
28 partners, such as hospital administrators, to ensure a wide breadth of expertise are included.  
29  
30  
31 The primary goal for the team will be to act as a vehicle for organisational leadership that  
32  
33 builds capacity in clinical improvement and implementation science methodology. Individual  
34  
35 roles within the team will be clarified across the project to reduce the risk of any duplicative  
36  
37 efforts and improve the visibility of activities across different patient cohorts where pathways  
38  
39 will be implemented. The team will meet monthly for the duration of the study to discuss  
40  
41 goals and action items relating to the project to facilitate implementation of the perioperative  
42  
43 pathways. For example, an important aim for the support team will be to reduce the time-  
44  
45 burden for clinicians during pathway implementation and to establish actions that will  
46  
47 minimise potential time pressures.  
48  
49  
50  
51  
52  
53

### 54 55 *Stage 2: Preparation*

56  
57  
58  
59  
60

1  
2  
3 The objective of the preparation stage is to use a consensus-building approach to develop and  
4  
5 standardise perioperative care pathways for each surgical cohort, and to use learnings from  
6  
7 the hip and knee replacement surgery cohorts retrospectively to facilitate successful  
8  
9 implementation. During this stage, perioperative pathways will be drafted by a clinician-  
10  
11 researcher in a hospital leadership position (AH) and senior management staff, based on a  
12  
13 combination of 'current' surgeon clinical guidelines and evidence-based practice. Clinical  
14  
15 consensus groups will then be established for each cohort by the clinician-researcher. These  
16  
17 groups will include multidisciplinary representation such as surgeons, anaesthetists, nursing  
18  
19 and allied health, and will be led by the discipline heads. Clinical consensus groups will  
20  
21 attend regular meetings facilitated by the clinician-researcher to discuss components of care  
22  
23 to be included in the standardised perioperative pathways, including acceptable bounds of  
24  
25 variation in practice. The pathways will optimise components of care differently across  
26  
27 cohorts based on current evidence and joint medical decision making, including, but not  
28  
29 limited to, preoperative optimisation, postoperative analgesia, surgical antibiotic prophylaxis,  
30  
31 anticoagulation protocols and mobilisation after surgery. An 'informal' approach will be  
32  
33 utilised to achieve consensus on the perioperative pathways whereby a set of pre-defined  
34  
35 components will be discussed at each meeting and agreed upon by group members using both  
36  
37 evidence and their own perspectives to inform discussion (24). Items will be documented by  
38  
39 the facilitator and relevant documentation will be sent to each group member for further  
40  
41 review as required following each meeting. Following this process, pathways will be  
42  
43 circulated by each group member to their individual teams for feedback and critical  
44  
45 modifications will then be made by the consensus groups at additional meetings which will  
46  
47 facilitate implementation during the next two stages.  
48  
49  
50  
51  
52  
53  
54

55  
56  
57 An additional goal of this phase will be to establish consensus from both the taskforce and  
58  
59 clinical consensus groups on a plan to implement the pathways. A draft implementation plan  
60

1  
2  
3 will be created by the task force. This plan will be reviewed by the clinical consensus groups  
4  
5 for modifications as required and each member will serve as “champions” to drive  
6  
7 implementation. Components of the implementation plan may include education and training  
8  
9 sessions for nursing and allied health and establishing audit and feedback processes on the  
10  
11 wards.  
12  
13

14  
15  
16 A separate stakeholder engagement group will be formed to represent the views of patient  
17  
18 representatives, engage frontline clinical staff in implementation, and facilitate rapid  
19  
20 feedback regarding implementation challenges to the care pathway implementation support  
21  
22 team. Researchers involved in qualitative data collection will observe this process through  
23  
24 naturalistic observation however, they will not have a role in determining components of the  
25  
26 pathways. During this stage, learnings obtained from implementation of pathways for the hip  
27  
28 and knee replacement cohort will also be analysed by the research team to further understand  
29  
30 the process of implementation using a consensus approach.  
31  
32  
33

### 34 35 *Stage 3: Implementation* 36

37  
38  
39 In the implementation stage, installation of the care pathways will be guided by the planned  
40  
41 implementation supports formalised in the preparation phase. It will be critical to monitor the  
42  
43 implementation process during this stage and adjust supports accordingly. Care pathway  
44  
45 toolkits including education and documentation resources will be finalised and disseminated  
46  
47 to clinical staff and patients at this stage to foster prompt widespread practice change. Further  
48  
49 monitoring of the degree of engagement and cohesion between clinical leadership and  
50  
51 frontline clinical staff will be achieved using participant observations. Particular attention  
52  
53 will be paid to the capacity of frontline clinical staff to absorb and apply new care pathways,  
54  
55 avoiding “bottlenecks” between care pathway development and implementation. This stage  
56  
57 will also be supported by an iterative audit and feedback process and data analytics to  
58  
59  
60

1  
2  
3 identify gains made and update external benchmarking comparisons over time. Audit and  
4  
5 feedback will relate to process (implementation) outcomes, health services outputs, and  
6  
7 patient-level outcomes.  
8  
9

#### 10 11 *Stage 4: Sustainment* 12

13  
14 The sustainment stage involves the continued application of the structures and processes of  
15  
16 the care pathways to realise tangible improvements in patient outcomes. At this stage, care  
17  
18 variation reduction becomes a standing item on regular Patient Safety and Quality Committee  
19  
20 meeting agendas. “Roadshow” presentations to the stakeholder engagement groups, frontline  
21  
22 clinical staff and hospital leadership groups can continue bi-directional communication and  
23  
24 feedback loops to identify new areas of care variance prioritised for future care pathways. We  
25  
26 also plan to translate our findings via policy maker round tables and engagement and training  
27  
28 with other private hospitals.  
29  
30  
31  
32  
33  
34  
35  
36  
37  
38  
39  
40  
41  
42  
43  
44  
45  
46  
47  
48  
49  
50  
51  
52  
53  
54  
55  
56  
57  
58  
59  
60

**Table 1** Overview of implementation strategies

| Implementation stage  | Implementation strategy                        | Description                                                                                                                                                                                                              |
|-----------------------|------------------------------------------------|--------------------------------------------------------------------------------------------------------------------------------------------------------------------------------------------------------------------------|
| <i>Exploration</i>    | Build a coalition                              | Recruit and cultivate relationships with partners in the implementation effort by formally establishing a care pathway support team                                                                                      |
| <i>Preparation</i>    | Conduct local consensus discussions            | Establish a structure for local providers and other stakeholders to form cohort-specific clinical consensus groups to discuss the processes of care and standardisation of pathways                                      |
|                       | Co-develop a formal implementation blueprint   | Co-develop a formal blueprint for iterative care pathway prioritisation and implementation                                                                                                                               |
| <i>Implementation</i> | Develop and implement care pathway toolkits    | Develop, test, and introduce quality improvement tools and educational materials                                                                                                                                         |
|                       | Audit and provide feedback                     | Embed a comprehensive system audit around care variation, clinical and process outcomes over specified time periods and disseminate to clinicians and administrators to monitor, evaluate, and modify provider behaviour |
| <i>Sustainment</i>    | Facilitate relay of clinical data to providers | Undertake formal monitoring and evaluation and develop a reporting structure and channels of communication for care pathway development, implementation, and outcomes                                                    |

## Recruitment

### *Semi-structured interviews and focus groups with hospital staff*

A purposive sample of staff who have been previously involved in the development of perioperative pathways or provision of care for the hip and knee replacement surgical cohorts, and staff currently involved in the development and implementation of the new pathways for the four new surgical cohorts will be recruited. Staff will be identified by MUH

1  
2  
3 co-investigators. Research staff not employed by MUH will approach the identified staff  
4  
5 members either by email invitation or face-to-face to request their participation in the  
6  
7 interviews, indicating that they have been identified by the research team as a key stakeholder  
8  
9 in the development and implementation of the pathways. This approach is designed to avoid  
10  
11 the potential impact of any existing relationships between hospital staff and co-investigators.  
12  
13 A brief explanation of the study and a written participant information form will be provided  
14  
15 to the staff members. Staff members will be provided with time to review the information and  
16  
17 ask any questions of the research staff prior to their decision to consent to participate in the  
18  
19 interviews and focus groups, or not.  
20  
21  
22

#### 23 24 25 *Participant observations with hospital staff*

26  
27 Staff attending relevant meetings will be recruited, such as planned support team project  
28  
29 meetings, clinical consensus group meetings, stakeholder engagement group meetings,  
30  
31 patient safety and quality committees, and ward based clinical meetings. Attendance of these  
32  
33 meetings by external staff will be through invitation from hospital co-investigators. Study  
34  
35 information and a participant information form will be provided prior to the initial meeting  
36  
37 where participant observations will take place.  
38  
39  
40

## 41 42 **OUTCOMES**

### 43 44 45 **Primary outcomes**

46  
47  
48 A summary of the primary outcome measures for this study can be found in Table 2.  
49  
50 Implementation outcomes including acceptability, appropriateness, feasibility, adoption,  
51  
52 fidelity and sustainment, and penetration, will be used to understand the impact of the  
53  
54 implementation strategies and implementation using a consensus-building approach on  
55  
56 secondary outcomes (25).  
57  
58  
59  
60



**Table 2** Summary of primary outcome measures

|                                        |                                                                                                                                                                                                                                                             |
|----------------------------------------|-------------------------------------------------------------------------------------------------------------------------------------------------------------------------------------------------------------------------------------------------------------|
| <b><i>Acceptability</i></b>            | Provider knowledge and satisfaction with aspects of the perioperative pathways and their implementation will be collected via qualitative interviews and participant observation                                                                            |
| <b><i>Appropriateness</i></b>          | Appropriateness will be assessed both retrospectively based on the experiences piloting the intervention for the hip and knee replacement cohorts using qualitative interviews, as well as for the four prospective cohorts using participant observation   |
| <b><i>Feasibility</i></b>              | Feasibility will be measured both retrospectively using pilot data from the hip and knee replacement cohorts and prospectively for the four new cohorts of interest using interviews and participant observation                                            |
| <b><i>Adoption</i></b>                 | Participant observations of the clinical consensus-building process will be used to measure the reasons pertaining to the intention, initial decision, or action to integrate the perioperative care pathways into routine clinical practice                |
| <b><i>Fidelity and sustainment</i></b> | Regular audits of adherence to the care pathways will provide an indication of variations to practice over time, including potential modifications and tailoring of the pathways by frontline staff (e.g., nurses) to better fit within their work routines |

|                           |                                                                                                                                      |
|---------------------------|--------------------------------------------------------------------------------------------------------------------------------------|
| <b><i>Penetration</i></b> | Penetration will be assessed by the number of eligible patients who receive the care pathway as intended according to planned audits |
|---------------------------|--------------------------------------------------------------------------------------------------------------------------------------|

## Secondary outcomes

Secondary outcomes assessed will include both process outcomes and clinical outcomes:

- Hospital or intensive care unit LOS for each cohort will be collected from routine administrative data systems.
- Patient-reported experience measures (PREMs) collected via patient surveys.
- Patient-reported outcome measures (PROMs) collected via patient surveys e.g., health-related quality of life questionnaires.
- Discharge destination collected from routine administrative data systems.
- Hospital-acquired complication rates collected from routine incident reporting systems.
- Hospital readmission rates collected from routine administrative data systems.

Selected PREMs and PROMs for the prostatectomy cohort are currently routinely collected at some site hospitals by specialist nurse practitioners and recorded in the patient's medical records. These include the Prostate Cancer Distress Screen (26), the International Prostate Symptom Score (IPSS) (27) and the Sexual Health Inventory for Men (28). Research staff will assist with sending out surveys prior to the routine six-month follow up assessment for up to 50-100 patients both before and after pathway implementation where patients consent, standardising an existing clinical interaction for comparison. Specific PROMs and PREMs measures for the remaining pathways will be determined during the consensus building

1  
2  
3 process and if agreed, these measures will only be collected for research purposes where  
4  
5 patients consent, prospectively.  
6  
7

## 8 9 **Data collection**

### 10 11 12 *Qualitative interviews and focus groups*

13  
14 Semi-structured one-on-one interviews or focus groups will be conducted over a 12-month  
15  
16 period with key clinical and non-clinical hospital staff and patient/consumer representatives,  
17  
18 focussing retrospectively on the pilot hip and knee replacement cohorts and prospectively for  
19  
20 each of the four new cohorts. Interview guides will be piloted prior to data collection and will  
21  
22 include questions pertaining to participants knowledge and experiences of implementing the  
23  
24 standardised perioperative pathways, as well as barriers and facilitators to this process.  
25  
26

27  
28 Interviews and focus groups will be conducted by one experienced qualitative researcher (LP)  
29  
30 via videoconference or face-to-face at participants' preferred time and location, lasting  
31  
32 between 30-60 minutes. The researcher will conduct all interviews in a private room suited to  
33  
34 the interviewee, where interviews will be digitally recorded and transcribed verbatim. Field  
35  
36 notes will also be made by the interviewer including initial thoughts, interpretations and  
37  
38 analysis of the data collected. Audio and written data will be immediately saved in a  
39  
40 password protected file on an encrypted password protected computer.  
41  
42  
43  
44

### 45 46 *Qualitative participant observation*

47  
48 Data collectors will conduct naturalistic participant observations within the planned support  
49  
50 team project meetings, clinical consensus group meetings, stakeholder engagement group  
51  
52 meetings, patient safety and quality committee, and ward-based clinical meetings (29). Each  
53  
54 observation session is anticipated to last between one to two hours. Fieldnotes will be taken  
55  
56 to spatially contextualise events within the study aims (30). These observations will not be  
57  
58 guided by a pre-determined schedule, but rather, they will inductively evolve in real-world  
59  
60

1  
2  
3 practice environments. This includes how staff converse with one another, how they plan and  
4  
5 make decisions together about perioperative care (i.e., implementation, communication  
6  
7 pathways, leadership), and how decision-making processes evolve and take shape across  
8  
9 different meetings with different stakeholders.  
10  
11

### 12 13 *Quantitative clinical outcomes data*

14  
15  
16  
17 Data on clinical outcomes will be collected from administrative databases. These data include  
18  
19 measures such as hospital LOS, discharge destination, acquired complications, and  
20  
21 readmission. Those data not routinely collected within existing administrative databases will  
22  
23 be collected prospectively or via retrospective electronic medical review.  
24  
25  
26

### 27 **Sample size**

28  
29  
30  
31 Qualitative data pertaining to the implementation of the perioperative clinical pathways will  
32  
33 use the concept of theoretical saturation to determine the observation and interview sample  
34  
35 size (31). Based on prior studies, we anticipate conducting 30 interviews and 15-20 meeting  
36  
37 observations (32, 33). Staff will be recruited using convenience time-frame sampling which  
38  
39 removes opportunistic recruitment of staff and patients, and any researcher or hospital  
40  
41 selection bias.  
42  
43  
44

45  
46 For quantitative data, a power calculation was undertaken for each of the four cohorts based  
47  
48 on the mean and standard deviation of LOS for each at a site hospital in the 2020 and 2021  
49  
50 financial years, an estimated important reduction in LOS, two sided  $\alpha=0.05$  and 80% power.  
51  
52 For spinal surgery, for example, reduction of mean LOS from 4.28 (SD: 4.66) to 2.78 (the  
53  
54 peer group average) required 152 patients pre- and post-intervention, which is achievable  
55  
56 with twelve months' follow-up. Bariatric surgery requires only 6 months', so the latter two  
57  
58 cohorts will be prioritised for early intervention. Overall, MUH LOS for cardiac surgery is in  
59  
60

1  
2  
3 line with its peer group, so for this cohort the target is intensive unit LOS, which is higher  
4  
5 than that of peers. It is important to note that the research team does not view LOS as the  
6  
7 most important clinical outcome for these four cohorts; it is used for sample size estimation  
8  
9 because it is an administrative outcome where there is a prospect of measuring relevant  
10  
11 quantitative change in the time available to the study. Moreover, relevant data on means and  
12  
13 standard deviations is routinely available, permitting sample size calculation.  
14  
15

## 16 17 18 **DATA ANALYSIS**

### 19 20 21 **Qualitative**

#### 22 23 24 *Qualitative interview and observation analysis*

25  
26  
27 Fieldnotes and interview transcripts will be imported into Nvivo20 for data management.

28  
29 Data will be analysed thematically (34, 35) by two experienced qualitative analysts (primary  
30  
31 and secondary) (LP and MS or EFA) working together to ensure the process is rigorous, and  
32  
33 to enable them to discuss the major and minor themes arising inductively and their  
34  
35 concomitant categories until consensus agreement can be achieved. The secondary analyst  
36  
37 will examine a subset of the complete dataset, to ensure methodological veracity during the  
38  
39 analytic process.  
40  
41  
42  
43  
44

### 45 46 **Quantitative**

#### 47 48 49 *Quantitative analysis of clinical endpoints*

50  
51  
52 Data will be analysed by three researchers (LP, GA and MNS) using SPSS. Descriptive  
53  
54 statistics will be used to summarise demographic data. For LOS, historical data will be  
55  
56 sourced from administrative databases to identify any secular trend and take this into account  
57  
58 in attributing any pre-post change to intervention. For other clinical outcomes, PREMs and  
59  
60

1  
2  
3 PROMs will be descriptive only and restricted to 50-100 patients from the prostatectomy  
4 cohort and any other cohort where these outcomes are available, while hospital acquired  
5 complications and hospital readmission rates will be compared pre- and post-intervention.  
6  
7  
8  
9

### 10 **Patient and Public Involvement**

11 Input and feedback was obtained from the site hospital's Clinical Leadership Committee and  
12 the Clinical Disciplines on aspects of the study design, such as the planned implementation  
13 strategies and outcome measures. Patients were not involved in the design of this study,  
14 however, patient consumer input and feedback will be sought from the site hospital's  
15 consumer advisory committee where resources for patients are developed.  
16  
17  
18  
19  
20  
21  
22  
23  
24  
25

### 26 **DISCUSSION**

27 Translating standardised clinical consensus pathways into current practice has proven  
28 complex and challenging. Whilst the efficacy of such pathways on process outcomes such as  
29 LOS and postoperative complications has been well-established, evidence suggests  
30 suboptimal implementation into healthcare settings with inconsistent adherence to some  
31 recommendations (13, 19, 21, 22, 36). Reported issues with sustainability of new care  
32 pathways following implementation further highlight the complexities of this process (37).  
33  
34  
35  
36  
37  
38  
39  
40  
41  
42  
43  
44  
45  
46  
47  
48  
49  
50  
51  
52  
53  
54  
55  
56  
57  
58  
59  
60  
There is no universal way to implement perioperative pathways of proven efficacy into  
hospital settings. Studies evaluating the success and effectiveness of care pathways can  
provide a basis for service providers however, inconsistent reporting on the methods used for  
implementation, as well as barriers and facilitators, make determining the optimal approach  
difficult. The focus of this research is to evaluate the process of implementing perioperative  
care pathways into a private hospital facility through a consensus-building approach, where  
key stakeholders will work together to conduct 'local consensus decisions' (38). The  
pragmatic nature of the study will deliberately make use of and augment existing practice

1  
2  
3 structures, staffing and approaches to implement these consensus pathways. This can provide  
4  
5 valuable insights into implementation during routine clinical practice and is thus, potentially  
6  
7 generalisable and transferrable to similar healthcare contexts.  
8  
9

10  
11 Successful implementation of perioperative care pathways is dependent upon numerous  
12  
13 factors due to the multifaceted nature required for change (39, 40, 41, 42). A thorough  
14  
15 understanding of the social and organisational contexts is required to optimise  
16  
17 implementation into hospital settings and ensure sustainability (42). It is important to  
18  
19 ascertain the views of clinicians and patients involved in implementation to gain a deeper  
20  
21 understanding of the acceptability of the pathway and the use of a consensus-building process  
22  
23 (43). Previous studies examining provider and patient perceptions of implementing Enhanced  
24  
25 Recovery After Surgery pathways have reported many barriers to successful implementation  
26  
27 (44, 45, 46). Ineffective communication between team members, lack of hospital resources,  
28  
29 increased workload and negative provider attitudes to the proposed interventions have been  
30  
31 cited as key issues that must be addressed to optimise implementation and sustainability (37,  
32  
33 40, 45). These themes are not isolated to surgical cohorts alone, with similar themes  
34  
35 impacting on implementation of standardised pathways reported for other areas, such as  
36  
37 mental health (40) and asthma (47).  
38  
39  
40  
41  
42  
43  
44

45 The utilisation of semi-structured interviews with key clinical and non-clinical staff is  
46  
47 designed to provide insight into the attitudes and experiences of the process of  
48  
49 implementation. This will enable an exploration of the barriers and facilitators to successfully  
50  
51 adopting a new standardised process of care. The degree of engagement and cohesion  
52  
53 between clinical leadership and frontline clinical staff will be monitored using participant  
54  
55 observations; with particular attention paid to the capacity of staff to absorb and apply new  
56  
57 care pathways into practice. The inclusion of a variety of staff members from different  
58  
59  
60

1  
2  
3 disciplines and different surgical cohorts will provide a deeper understanding of the processes  
4  
5 of implementation for a variety of surgical procedures, where different cohorts may have  
6  
7 different views and experiences of implementing consensus-based pathways.  
8  
9

10  
11 The insights obtained through these methods aim to contribute to the growing knowledge  
12  
13 base about the factors that impact upon effective implementation of perioperative pathways  
14  
15 into hospital settings utilising a consensus approach. The application of implementation  
16  
17 science methods and use of the EPIS framework (23) will enable us to characterise the  
18  
19 processes of implementation and evaluate factors that may impact upon implementation at  
20  
21 different phases of the process. This enables forward thinking about sustainability and  
22  
23 optimising implementation in the future. Other clinical settings may find this knowledge  
24  
25 useful to inform integration and adaptations of similar pathways into routine care to reduce  
26  
27 unwarranted variation.  
28  
29  
30

31  
32  
33 **Word count:** 3994 words  
34  
35

36  
37 **List of Abbreviations:**  
38

39 EPIS Exploration, Preparation, Implementation, and Sustainment Framework;  
40  
41

42 IT Information Technology;  
43  
44

45 LOS Length of stay;  
46  
47

48  
49 MUH Macquarie University Hospital;  
50  
51

52  
53 PREMs Patient-reported experience measures;  
54  
55

56  
57 PROMs Patient-reported outcome measures;  
58  
59

60 SD Standard deviation



1  
2  
3 USA United States of America  
4  
5

6  
7 **DECLARATIONS:**  
8

9  
10 **Ethics and dissemination:**  
11

12  
13 Approval to conduct this study has been obtained from the Macquarie University Human  
14 Research Ethics Medical Sciences Committee (Reference No: 520221219542374). Research  
15 governance authorisation has been provided by the MQ Health Clinical Research Executive.  
16  
17 A waiver for consent will be sought from participants for data obtained in this study.  
18  
19 PROMs/PREMs data being collected for clinical purposes will seek informed patient consent  
20 for de-identified data to be used for research purposes. The findings of this study will be  
21 disseminated through peer-reviewed publications, conference presentations, and summaries  
22 or reports for key stakeholders and partners in the field.  
23  
24  
25  
26  
27  
28  
29  
30

31  
32  
33 **Protocol amendments:**  
34

35  
36 Approval from the study investigators, Human Research Ethics Committee, and research  
37 governance will be sought for any protocol amendments. Amendments will be reported in the  
38 published manuscript as a deviation from the protocol.  
39  
40  
41  
42  
43

44  
45 **Consent for publication:**  
46

47  
48 Not applicable.  
49

50  
51 **Availability of data and materials:**  
52

53  
54  
55 Data sharing is not applicable to this article as no datasets were generated or analysed during  
56 the current study.  
57  
58  
59  
60

**Competing interests:**

The authors declare that they have no competing interests.

**Funding:**

This project was funded from the Translational Research Grant Program from the HCF Research Foundation (CIA Sarkies). The funders were not involved in the design or conduct of the study. The content is solely the responsibility of the authors and does not necessarily represent the official view of the HCF Research Foundation. JB reports funding from multiple sources including the National Health and Medical Research Council: 9100002 and GNT1176620.

**Authors' contributions:**

The study was conceived by MS, AH, EF-A, GA, JCL, JB, GG, PDH, KC, KH, AP, CH, DG, LAE, LT, and RP and all authors contributed to the study design. LP, CH and MS wrote the initial draft of the manuscript. All authors contributed to and approved the final version of the manuscript.

**Acknowledgements:**

The authors would like to acknowledge the contributions of Macquarie University Hospital, the members of the clinical standardisation taskforce and the staff that are assisting with the project.

**REFERENCES**

1. Braithwaite J, Glasziou P, Westbrook J. The three numbers you need to know about healthcare: the 60-30-10 Challenge. *BMC Med* 2020;18(1):102.
2. Australian Commission on Safety and Quality in Health Care and Australian Institute of Health and Welfare. *Exploring Healthcare Variation in Australia: Analyses Resulting from an OECD Study*. Sydney: ACSQHC; 2014.
3. Braithwaite J, Hibbert PD, Jaffe A, et al. Quality of Health Care for Children in Australia, 2012-2013. *JAMA* 2018;319(11):1113-24.
4. McGlynn EA, Asch SM, Adams J, et al. The quality of health care delivered to adults in the United States. *N Engl J Med* 2003;348(26):2635-45.
5. Mangione-Smith R, DeCristofaro AH, Setodji CM, et al. The quality of ambulatory care delivered to children in the United States. *N Engl J Med* 2007;357(15):1515-23.
6. Runciman WB, Hunt TD, Hannaford NA, et al. CareTrack: assessing the appropriateness of health care delivery in Australia. *Med J Aust* 2012;197(2):100-5.
7. Australian Commission on Safety and Quality in Health Care and Australian Institute of Health and Welfare. *The Fourth Australian Atlas of Healthcare Variation*. Sydney: ACSQHC; 2021
8. Royal Australasian College of Surgeons. *Rehabilitation Pathways Following Hip and Knee Arthroplasty* [Internet]. Adelaide: Royal Australasian College of Surgeons, 2018 [cited 2023 March 1] Available from <https://www.surgeons.org/en/Resources/reports-guidelines-publications/surgical-variance-reports>
9. Australian Institute of Health and Welfare. *Australia's hospitals at a glance* [Internet]. Canberra: Australian Institute of Health and Welfare, 2022 [cited 2023 Jan 31] Available from <https://www.aihw.gov.au/reports/hospitals/australias-hospitals-at-a-glance/contents/summary>.

- 1  
2  
3 10. Goodair B, Reeves A. Outsourcing health-care services to the private sector and  
4  
5 treatable mortality rates in England, 2013–20: an observational study of NHS privatisation.  
6  
7 *Lancet Public Health* 2022;7(7):e638-e46.
- 8  
9  
10 11. Sá LA, Covre ER, Melo WA, Gomes RM, Tostes MFDP. Public-private relationship  
11  
12 in surgical hospitalizations through the Unified Health System. *Rev Lat Am Enfermagem*  
13  
14 2021;29:e3467.
- 15  
16  
17 12. Anderson M. Changes in publicly and privately funded care in England following a  
18  
19 national programme to reduce provision of low-value elective surgery. *Br J Surg*  
20  
21 2023;110(2):209-16.
- 22  
23  
24 13. Rotter T, Kinsman L, James EL, et al. Clinical pathways: effects on professional  
25  
26 practice, patient outcomes, length of stay and hospital costs. *Cochrane Database Syst Rev*  
27  
28 2010(3).
- 29  
30  
31 14. Harrison R, Hinchcliff RA, Manias E, Mears S, Heslop D, Walton V, et al. Can  
32  
33 feedback approaches reduce unwarranted clinical variation? A systematic rapid evidence  
34  
35 synthesis. *BMC Health Serv Res* 2020;20(1):40.
- 36  
37  
38 15. Harrison R, Manias E, Mears S, Heslop D, Hinchcliff R, Hay L. Addressing  
39  
40 unwarranted clinical variation: a rapid review of current evidence. *J Eval Clin Pract*  
41  
42 2019;25(1):53-65.
- 43  
44  
45 16. Cline KM, Clement V, Rock-Klotz J, et al. Improving the cost, quality, and safety of  
46  
47 perioperative care: A systematic review of the literature on implementation of the  
48  
49 perioperative surgical home. *J Clin Anesth* 2020;63:109760.
- 50  
51  
52 17. McQueen K, Coonan T, Ottaway A, et al. Anesthesia and Perioperative Care. In:  
53  
54 *Essential Surgery: Disease Control Priorities: 3<sup>rd</sup> ed. (Volume 1)*. Washington (DC): The  
55  
56 International Bank for Reconstruction and Development / The World Bank; 2015
- 57  
58  
59  
60

- 1  
2  
3 18. Gabbay JIM, A. Practice-Based Evidence for Healthcare : Clinical Mindlines. 1 ed.  
4  
5 London: Routledge; 2010.  
6
- 7  
8 19. Kurtin P, Stucky E. Standardize to excellence: improving the quality and safety of  
9  
10 care with clinical pathways. *Pediat Clin North Am* 2009;56(4):893-904.  
11
- 12 20. Heymans MJ, Kort NP, Snoeker BA, Schotanus MG. Impact of enhanced recovery  
13  
14 pathways on safety and efficacy of hip and knee arthroplasty: A systematic review and meta-  
15  
16 analysis. *World J Orthop* 2022;13(3):307.  
17
- 18 21. Kagedan DJ, Ahmed M, Devitt KS, Wei AC. Enhanced recovery after pancreatic  
19  
20 surgery: a systematic review of the evidence. *HPB (Oxford)* 2015;17(1):11-6.  
21  
22
- 23 22. Lemmens L, Van Zelm R, Rinkes IB, et al. Clinical and organizational content of  
24  
25 clinical pathways for digestive surgery: a systematic review. *Dig Surg* 2009;26(2):91-9.  
26  
27
- 28 23. Moullin JC, Dickson KS, Stadnick NA, et al. Systematic review of the Exploration,  
29  
30 Preparation, Implementation, Sustainment (EPIS) framework. *Implement Sci* 2019;14(1):1.  
31  
32
- 33 24. World Health Organization. WHO handbook for guideline development. 2nd ed:  
34  
35 World Health Organization; 2014.  
36
- 37 25. Proctor E, Silmere H, Raghavan R, et al. Outcomes for Implementation Research:  
38  
39 Conceptual Distinctions, Measurement Challenges, and Research Agenda. *Adm Policy Ment*  
40  
41 *Health* 2011;38(2):65-76.  
42  
43
- 44 26. Prostate Cancer Foundation of Australia. Screening for Distress [Interent] 2022 [cited  
45  
46 2023 March 3] Available from: [https://www.pcfa.org.au/awareness/for-healthcare-  
47  
48 professionals/screening-for-distress/](https://www.pcfa.org.au/awareness/for-healthcare-professionals/screening-for-distress/).  
49
- 50 27. Barry MJ, Fowler Jr FJ, O'Leary MP, et al. The American Urological Association  
51  
52 symptom index for benign prostatic hyperplasia. *J Urol* 1992;148(5):1549-57.  
53  
54  
55  
56  
57  
58  
59  
60

- 1  
2  
3 28. Rosen RC, Cappelleri J, Smith M, et al. Development and evaluation of an abridged,  
4 5-item version of the International Index of Erectile Function (IIEF-5) as a diagnostic tool for  
5 6 erectile dysfunction. *Int J Impot Res* 1999;11(6):319-26.  
7  
8  
9  
10 29. Rapport F, Auton E, Cartmill J, et al. Fit for purpose? Organisational productivity  
11 and workforce wellbeing in workspaces in Hospital (FLOURISH): a multimethod  
12 qualitative study protocol. *BMJ Open* 2019;9(4):e027636.  
13  
14  
15 30. Emerson RM, Fretz RI, Shaw LL. *Writing ethnographic fieldnotes*. 2nd ed. Chicago:  
16 University of Chicago press; 2011.  
17  
18 31. Hennink MM, Kaiser BN, Marconi VC. Code saturation versus meaning saturation:  
19 how many interviews are enough? *Qual Health Res* 2017;27(4):591-608.  
20  
21 32. Hutchinson K, Ryder T, Coleman H, et al. Determining the role and responsibilities of  
22 the community epilepsy nurse in the management of epilepsy. *J clin Nurs* 2022.  
23  
24 33. Rapport F, Francis-Auton E, Cartmill J, et al. A mobile methods pilot study of  
25 surgical spaces: 'fit for purpose? Organisational productivity and workforce wellbeing in  
26 workspaces in hospital' (FLOURISH). *BMC Health Serv Res* 2020;20(1):78.  
27  
28 34. Braun V, Clarke V. Reflecting on reflexive thematic analysis. *Qualitative research in*  
29 *sport, exercise and health*. 2019;11(4):589-97.  
30  
31 35. Clarke V, Braun V. Thematic analysis. In: Michalos, A.C. (eds) *Encyclopaedia of*  
32 *quality of life and well-being research*. Netherlands: Springer; 2014.  
33  
34 36. Simmons JM, Kotagal UR. Reliable implementation of clinical pathways: what will it  
35 take—that is the question. *J Pediatr* 2008;152(3):303-4.  
36  
37 37. Evans-Lacko S, Jarrett M, McCrone P, Thornicroft G. Facilitators and barriers to  
38 implementing clinical care pathways. *BMC Health Serv Res* 2010;10(1):1-6.  
39  
40  
41  
42  
43  
44  
45  
46  
47  
48  
49  
50  
51  
52  
53  
54  
55  
56  
57  
58  
59  
60

- 1  
2  
3 38. Powell BJ, Waltz TJ, Chinman MJ, et al. A refined compilation of implementation  
4 strategies: results from the Expert Recommendations for Implementing Change (ERIC)  
5 project. *Implement Sci* 2015;10(1):21.  
6  
7  
8  
9  
10 39. Fischer F, Lange K, Klose K, et al. Barriers and strategies in guideline  
11 implementation—a scoping review. *Healthcare (Basel)* 2016;4(3):36  
12  
13  
14 40. Jabbour M, Newton AS, Johnson D, Curran JA. Defining barriers and enablers for  
15 clinical pathway implementation in complex clinical settings. *Implement Sci.* 13(1):139.  
16  
17  
18 41. Pearsall EA, McLeod RS. Enhanced recovery after surgery: implementation  
19 strategies, barriers and facilitators. *Surgical Clinics* 2018;98(6):1201-10.  
20  
21  
22 42. McArthur C, Bai Y, Hewston P, et al. Barriers and facilitators to implementing  
23 evidence-based guidelines in long-term care: a qualitative evidence synthesis. *Implement Sci*  
24 2021;16(1):1-25.  
25  
26  
27 43. Pinnock H, Epiphaniou E, Taylor SJ. Phase IV implementation studies. The forgotten  
28 finale to the complex intervention methodology framework. *Ann Am Thorac Soc*  
29 2014;11(Supplement 2):S118-S22.  
30  
31  
32 44. Stone AB, Yuan CT, Rosen MA, et al. Barriers to and Facilitators of Implementing  
33 Enhanced Recovery Pathways Using an Implementation Framework: A Systematic Review.  
34 *JAMA Surg* 2018;153(3):270-9  
35  
36  
37 45. Lyon A, Solomon MJ, Harrison JD. A qualitative study assessing the barriers to  
38 implementation of enhanced recovery after surgery. *World J Surg* 2014;38:1374-80.  
39  
40  
41 46. Alawadi ZM, Leal I, Phatak UR, et al. Facilitators and barriers of implementing  
42 enhanced recovery in colorectal surgery at a safety net hospital: a provider and patient  
43 perspective. *Surgery* 2016;159(3):700-12.  
44  
45  
46  
47  
48  
49  
50  
51  
52  
53  
54  
55  
56  
57  
58  
59  
60

1  
2  
3 47. Sharpe H, Potestio M, Cave A, et al. Facilitators and barriers to the implementation of  
4 the Primary Care Asthma Paediatric Pathway: a qualitative analysis. BMJ Open  
5  
6  
7  
8 2022;12(5):e058950.  
9  
10  
11  
12  
13  
14  
15  
16  
17  
18  
19  
20  
21  
22  
23  
24  
25  
26  
27  
28  
29  
30  
31  
32  
33  
34  
35  
36  
37  
38  
39  
40  
41  
42  
43  
44  
45  
46  
47  
48  
49  
50  
51  
52  
53  
54  
55  
56  
57  
58  
59  
60

For peer review only



# BMJ Open

## IMPLEMENTATION OF CONSENSUS-BASED PERIOPERATIVE CARE PATHWAYS TO REDUCE CLINICAL VARIATION FOR ELECTIVE SURGERY IN A PRIVATE HOSPITAL: A MIXED METHODS PRE-POST STUDY PROTOCOL

|                               |                                                                                                                                                                                                                                                                                                                                                                                                                                                                                                                                                                                                                                                                                                                                                                                                                                                                                                                                                                                                                                                                                                                                                                                                                                                                                                                                                                                                                                                                                                                                                                                                                                                                                                                                                                                                                                                                                                                                                                                                                                                                                                                                                                                                                                                                                                                                                                                                                                                           |
|-------------------------------|-----------------------------------------------------------------------------------------------------------------------------------------------------------------------------------------------------------------------------------------------------------------------------------------------------------------------------------------------------------------------------------------------------------------------------------------------------------------------------------------------------------------------------------------------------------------------------------------------------------------------------------------------------------------------------------------------------------------------------------------------------------------------------------------------------------------------------------------------------------------------------------------------------------------------------------------------------------------------------------------------------------------------------------------------------------------------------------------------------------------------------------------------------------------------------------------------------------------------------------------------------------------------------------------------------------------------------------------------------------------------------------------------------------------------------------------------------------------------------------------------------------------------------------------------------------------------------------------------------------------------------------------------------------------------------------------------------------------------------------------------------------------------------------------------------------------------------------------------------------------------------------------------------------------------------------------------------------------------------------------------------------------------------------------------------------------------------------------------------------------------------------------------------------------------------------------------------------------------------------------------------------------------------------------------------------------------------------------------------------------------------------------------------------------------------------------------------------|
| Journal:                      | <i>BMJ Open</i>                                                                                                                                                                                                                                                                                                                                                                                                                                                                                                                                                                                                                                                                                                                                                                                                                                                                                                                                                                                                                                                                                                                                                                                                                                                                                                                                                                                                                                                                                                                                                                                                                                                                                                                                                                                                                                                                                                                                                                                                                                                                                                                                                                                                                                                                                                                                                                                                                                           |
| Manuscript ID                 | bmjopen-2023-075008.R1                                                                                                                                                                                                                                                                                                                                                                                                                                                                                                                                                                                                                                                                                                                                                                                                                                                                                                                                                                                                                                                                                                                                                                                                                                                                                                                                                                                                                                                                                                                                                                                                                                                                                                                                                                                                                                                                                                                                                                                                                                                                                                                                                                                                                                                                                                                                                                                                                                    |
| Article Type:                 | Protocol                                                                                                                                                                                                                                                                                                                                                                                                                                                                                                                                                                                                                                                                                                                                                                                                                                                                                                                                                                                                                                                                                                                                                                                                                                                                                                                                                                                                                                                                                                                                                                                                                                                                                                                                                                                                                                                                                                                                                                                                                                                                                                                                                                                                                                                                                                                                                                                                                                                  |
| Date Submitted by the Author: | 04-Jul-2023                                                                                                                                                                                                                                                                                                                                                                                                                                                                                                                                                                                                                                                                                                                                                                                                                                                                                                                                                                                                                                                                                                                                                                                                                                                                                                                                                                                                                                                                                                                                                                                                                                                                                                                                                                                                                                                                                                                                                                                                                                                                                                                                                                                                                                                                                                                                                                                                                                               |
| Complete List of Authors:     | <p>Pagano, Lisa; Macquarie University Faculty of Medicine Health and Human Sciences, Australian Institute of Health Innovation<br/> Hemmert, Cameron; The University of Sydney Faculty of Medicine and Health, School of Health Sciences<br/> Hirschhorn, Andrew; Macquarie University Faculty of Medicine Health and Human Sciences, MQ Health<br/> Francis-Auton, Emilie; Macquarie University Faculty of Medicine Health and Human Sciences, Australian Institute of Health Innovation<br/> Arnolda, Gaston; Macquarie University Faculty of Medicine Health and Human Sciences, Australian Institute of Health Innovation<br/> Long, Janet; Macquarie University Faculty of Medicine Health and Human Sciences, Australian Institute of Health Innovation<br/> Braithwaite, Jeffrey; Macquarie University Faculty of Medicine Health and Human Sciences, Australian Institute of Health Innovation<br/> Gumley, Graham; Macquarie University Faculty of Medicine Health and Human Sciences, MQ Health<br/> Hibbert, Peter; Macquarie University Faculty of Medicine Health and Human Sciences, Australian Institute of Health Innovation; University of South Australia Allied Health and Human Performance, IIMPACT in Health<br/> Churruca, Kate; Macquarie University Faculty of Medicine Health and Human Sciences, Australian Institute of Health Innovation<br/> Hutchinson, Karen; Macquarie University Faculty of Medicine Health and Human Sciences, Australian Institute of Health Innovation<br/> Partington, Andrew; Flinders University, Flinders Health and Medical Research Institute; Macquarie University Faculty of Medicine Health and Human Sciences, Australian Institute of Health Innovation<br/> Hughes, Clifford; Macquarie University Faculty of Medicine Health and Human Sciences, Australian Institute of Health Innovation; Macquarie University Faculty of Medicine Health and Human Sciences, MQ Health<br/> Gillatt, David; Macquarie University Faculty of Medicine Health and Human Sciences, MQ Health<br/> Ellis, Louise A.; Macquarie University Faculty of Medicine Health and Human Sciences, Australian Institute of Health Innovation<br/> Testa, Luke; Macquarie University Faculty of Medicine Health and Human Sciences, Australian Institute of Health Innovation<br/> Patel, Romika; Macquarie University Faculty of Medicine Health and Human Sciences, Australian Institute of Health Innovation</p> |

|                                  |                                                                                                                                                                                                                                                        |
|----------------------------------|--------------------------------------------------------------------------------------------------------------------------------------------------------------------------------------------------------------------------------------------------------|
|                                  | Sarkies, Mitchell N; The University of Sydney Faculty of Medicine and Health, School of Health Sciences; Macquarie University Faculty of Medicine Health and Human Sciences, Australian Institute of Health Innovation                                 |
| <b>Primary Subject Heading</b> : | Research methods                                                                                                                                                                                                                                       |
| Secondary Subject Heading:       | Health services research                                                                                                                                                                                                                               |
| Keywords:                        | Adult anaesthesia < ANAESTHETICS, Change management < HEALTH SERVICES ADMINISTRATION & MANAGEMENT, Protocols & guidelines < HEALTH SERVICES ADMINISTRATION & MANAGEMENT, Quality in health care < HEALTH SERVICES ADMINISTRATION & MANAGEMENT, SURGERY |
|                                  |                                                                                                                                                                                                                                                        |

SCHOLARONE™  
Manuscripts

1  
2  
3 **IMPLEMENTATION OF CONSENSUS-BASED PERIOPERATIVE CARE**  
4  
5 **PATHWAYS TO REDUCE CLINICAL VARIATION FOR ELECTIVE SURGERY IN**  
6  
7 **A PRIVATE HOSPITAL: A MIXED METHODS PRE-POST STUDY PROTOCOL**  
8  
9

10  
11 **AUTHORS:**  
12

13  
14 **Lisa Pagano<sup>1</sup>, Cameron Hemmert<sup>2</sup>, Andrew Hirschhorn<sup>3</sup>, Emilie Francis-Auton<sup>1</sup>,**  
15  
16 **Gaston Arnolda<sup>1</sup>, Janet C Long<sup>1</sup>, Jeffrey Braithwaite<sup>1</sup>, Graham Gumley<sup>3</sup>, Peter D**  
17  
18 **Hibbert<sup>1,4</sup>, Kate Churruca<sup>1</sup>, Karen Hutchinson<sup>1</sup>, Andrew Partington<sup>5,1</sup>, Cliff Hughes<sup>1,3</sup>,**  
19  
20 **David Gillatt<sup>3</sup>, Louise A Ellis<sup>1</sup>, Luke Testa<sup>1</sup>, Romika Patel<sup>1</sup>, Mitchell Sarkies<sup>2,1</sup>**  
21  
22

23  
24  
25 **AFFILIATIONS:**  
26

- 27  
28  
29 1. Australian Institute of Health Innovation, Faculty of Medicine, Health and Human  
30  
31 Sciences, Macquarie University  
32  
33 2. School of Health Sciences, Faculty of Medicine and Health, University of Sydney  
34  
35 3. MQ Health, Faculty of Medicine, Health and Human Sciences, Macquarie University  
36  
37 4. IIMPACT in Health, Allied Health and Human Performance, University of South  
38  
39 Australia  
40  
41  
42 5. Flinders Health and Medical Research Institute, Flinders University  
43  
44

45  
46 **CORRESPONDING AUTHOR:**  
47

48 Lisa Pagano  
49

50 Australian Institute of Health Innovation  
51

52 Faculty of Medicine, Health and Human Sciences  
53

54 Level 6, 75 Talavera Road  
55

56 Macquarie University, NSW 2109, Australia  
57

58 Telephone: +61 (2) 9850 2448  
59  
60

Email: lisa.pagano@mq.edu.au

## ABSTRACT

**Introduction:** Addressing clinical variation in elective surgery is challenging. A key issue is how to gain consensus between largely autonomous clinicians. Understanding how the consensus process works to develop and implement perioperative pathways and the impact of these pathways on reducing clinical variation can provide important insights into the effectiveness of the consensus process. The primary objective of this study is to understand the implementation of an organisationally supported, consensus approach to implement perioperative care pathways in a private healthcare facility and to determine its impact.

**Methods:** A mixed-methods Effectiveness-Implementation Hybrid (Type III) pre-post study will be conducted in one Australian private hospital. Five new consensus-based perioperative care pathways will be developed and implemented for specific patient cohorts: spinal surgery, radical prostatectomy, cardiac surgery, bariatric surgery and total hip and knee replacement. The individual components of these pathways will be confirmed as part of a consensus-building approach and will follow a four-stage implementation process using the Exploration, Preparation, Implementation, and Sustainment (EPIS) framework. The process of implementation, as well as barriers and facilitators, will be evaluated through semi-structured interviews and focus groups with key clinical and non-clinical staff, and participant observation. We anticipate completing 30 interviews and 15-20 meeting observations. Administrative and clinical end-points for at least 152 participants will be analysed to assess the effectiveness of the pathways.

1  
2  
3 **Ethics and dissemination:** This study received ethical approval from Macquarie University  
4  
5 Human Research Ethics Medical Sciences Committee (Reference No: 520221219542374).  
6

7  
8 The findings of this study will be disseminated through peer-reviewed publications,  
9  
10 conference presentations, and reports for key stakeholders.  
11  
12

13 **Keywords:** Implementation Science, Clinical variation, Perioperative pathways, Consensus,  
14  
15 Elective surgery, Private providers  
16  
17

18  
19 **Strengths and Limitations:**  
20

- 21  
22
- 23 • The pragmatic nature of the study will deliberately make use of existing practice  
24 structures and approaches to implement the consensus pathways and to obtain patient-  
25 related outcomes.  
26  
27
  - 28 • Multiple forms of qualitative data collection will be used to ensure rigour and a  
29 diverse range of perspectives will be gathered.  
30  
31
  - 32 • An understanding of the barriers and facilitators to adopting new standardised  
33 processes of care will be obtained which will provide a deeper understanding of the  
34 experiences of implementation at different time periods across multiple surgical  
35 cohorts.  
36  
37
  - 38 • Due to the pragmatic nature of the study, pre-post comparison of some clinical  
39 outcomes will be limited to a smaller sample size from one surgical cohort only.  
40  
41  
42  
43  
44  
45  
46  
47  
48  
49  
50  
51  
52  
53  
54  
55  
56  
57  
58  
59  
60

## INTRODUCTION

Addressing clinical variation is a fundamental component of health system improvement.

Whilst in some circumstances variation can be beneficial (e.g., when it represents innovation, or responses to individual patient need or preference), variation in healthcare processes that are unrelated to patient needs or those that differ from evidence-informed guidelines can compromise patient care, create inefficiencies, and contribute to health inequality (1, 2). This is a growing problem both in Australia and internationally, where on average, 60% of recommended care according to best practice guidelines is delivered to patients (3, 4, 5, 6, 7).

In addition, 30% of all care provided could be considered “low value” or waste, and 10% results in some form of iatrogenic harm (1, 4, 5). For example, care processes and outcomes for certain surgical patient cohorts have been found to differ substantially between hospitals in both public and private sectors (8). Data from Australia and the United States of America (USA) demonstrate a high degree of variation in length of stay (LOS), rates of transfer to inpatient rehabilitation following hip and knee arthroplasty (9), and specific to private hospitals, higher unplanned stay (>2 hours) in recovery after surgery (8). Considering the increasing number of elective surgeries and associated hospitalisations undertaken in private hospitals in Australia (10) and elsewhere (11, 12, 13), reducing unwarranted clinical variation in these settings is critical to generating higher value care, improving patient outcomes, and reducing healthcare expenditure.

A number of studies have examined ways to reduce unwarranted clinical variation, such as through the implementation of evidence-based perioperative care pathways for surgical cohorts (14, 15, 16). Enhanced recovery after surgery (ERAS) models are one such example involving the implementation of multimodal, evidence-based perioperative pathway designed to achieve early recovery and optimal patient outcomes (17). However, despite many studies

1  
2  
3 demonstrating the efficacy of some strategies in reducing variation, the optimal methods of  
4 developing and implementing such strategies into complex healthcare systems remain  
5 unclear. More evidence is needed on how best to implement and sustain these changes, as  
6 well as the barriers and facilitators to different methods of implementation to reduce  
7 unwarranted variation.  
8  
9

10  
11  
12  
13  
14  
15 Evidence-informed perioperative care pathways designed to standardise the management of  
16 surgical patients to the best evidence-informed practice have been shown to reduce variation  
17 and improve patient outcomes (18). Perioperative care refers to the care of patients before,  
18 during, and after surgical procedures involving anaesthesia (19). Care leading up to a surgical  
19 procedure involves the reduction of modifiable risks, often in a preoperative clinic, through  
20 patient education, medication optimisation, and other prophylactic treatments. After surgery,  
21 the focus is on expediting recovery and minimising the risk of complications by optimising  
22 such things as pain relief, antibiotic regimens to reduce infection risks, anticoagulation  
23 protocols to avoid blood clotting, and early mobility to return to normal function. Private  
24 hospitals in most countries have historically relied on accredited medical practitioners to  
25 individually develop their own perioperative care protocols using a combination of their  
26 experience, past practice, and clinical practice guidelines (20). Such protocols, when  
27 implemented as frontline care, can create variation in care delivery based on provider  
28 preferences.  
29  
30  
31  
32  
33  
34  
35  
36  
37  
38  
39  
40  
41  
42  
43  
44  
45  
46  
47

48 Implementing changes to patient care is complex and challenging, requiring concerted efforts  
49 over time. This challenge is well documented and usually involves the provision of resources  
50 to support change efforts, shifting professional roles, and altering cultural norms (21, 22).

51  
52  
53 Rather than a “one size fits all” approach, pathways need to be developed to suit the  
54 particular needs of the patient cohort and surgical discipline, as well as local resources  
55 available. However, there is no universal approach to implementing these pathways. In many  
56  
57  
58  
59  
60

1  
2  
3 private hospitals, medical practitioners tend to operate with a high degree of professional  
4  
5 autonomy, which necessitates a consensus-building approach between providers for any  
6  
7 standardisation of care processes.  
8  
9

## 10 11 **Objectives**

12  
13  
14 The primary objective of this study is to determine successful processes to implementing  
15  
16 perioperative care pathways in a private hospital setting using an organisationally supported  
17  
18 consensus approach for surgical cohorts, including: i) spinal surgery; ii) radical  
19  
20 prostatectomy; iii) cardiac surgery; iv) bariatric surgery and; v) hip and knee replacement  
21  
22 surgery. The secondary objective is to assess the impact on administrative and, where  
23  
24 possible, clinical and patient-reported outcomes. We hypothesise that a consensus-based  
25  
26 approach to care pathway development and implementation will lead to high levels of fidelity  
27  
28 to best practice perioperative care processes and improve patient outcomes.  
29  
30  
31  
32  
33

## 34 35 **METHODS**

### 36 37 38 **Study design**

39  
40  
41 A mixed-methods Effectiveness-Implementation Hybrid (Type III) pre-post study will be  
42  
43 used to evaluate the implementation of evidence and consensus-based perioperative  
44  
45 pathways, prioritising assessment of effectiveness of the implementation strategies. Whilst  
46  
47 improving clinical outcomes is an important goal of any change process, standardisation of  
48  
49 perioperative pathways has already been demonstrated to confer benefit to clinical outcomes  
50  
51 (14, 23, 24, 25, 26). As such, clinical outcomes will be considered secondary in this study.  
52  
53  
54 The perioperative care pathways will be implemented once consensus has been reached and  
55  
56 outcomes will be compared to those observed before pathway development and integration  
57  
58 into routine care, as a control period.  
59  
60



## Study Setting

The study will be conducted over a two-year period from October 2022 to December 2024 at Macquarie University Hospital (MUH). MUH is located in Sydney, Australia and is a university-owned, private teaching hospital that focusses on clinical care, teaching and research. MUH comprises 144 beds, 16 operating theatres, and is staffed by over 200 surgeons and other health professionals.

## Eligibility criteria

Hospital staff and patients will be considered as study participants for the surgical cohorts: spinal surgery, radical prostatectomy, cardiac surgery, bariatric surgery and hip and knee replacement surgery. Data from hospital staff participants will primarily be used to examine the implementation of perioperative care pathways. Administrative data and data from consenting prostatectomy patients will be used firstly, to conduct a process evaluation and secondly, to evaluate impacts on patient-related outcomes.

*Hospital staff:* Local hospital staff involved in the delivery of clinical care or development and implementation of care pathways (i.e., both clinicians and non-clinical staff) will be considered eligible to participate in the implementation component of this study.

*Patients:* Those admitted during the relevant study periods, seeking care for any of the clinical cohorts of interest will be considered eligible for this study.

There are no specific exclusion criteria for this study.

## Intervention

1  
2  
3 Development and implementation of the cohort-specific standardised perioperative pathways  
4 will follow a six-step process nested within four implementation stages using the Exploration,  
5 Preparation, Implementation, and Sustainment (EPIS) framework (27). The EPIS Framework  
6 guides projects through key stages of the implementation process and highlights important  
7 factors influencing implementation success within the broader “outer context” (system) and  
8 the proximal “inner context” (organisation) across each EPIS stage. The proposed  
9 implementation strategies are summarised in Table 1. The general implementation strategies  
10 will be tailored to each new patient cohort utilising a consensus-building approach. Our  
11 implementation science approach will examine this consensus-building process to support  
12 successful implementation of the pathways.  
13  
14  
15  
16  
17  
18  
19  
20  
21  
22  
23  
24  
25  
26

### 27 *Stage 1: Exploration*

28  
29  
30  
31 The exploration stage will aim to understand the existing and emerging needs of both  
32 clinicians and patients, and to identify the optimal modifications and supports required for the  
33 implementation strategy to address those needs. This could include modifications to existing  
34 information technology (IT) processes or the introduction of organisational support and  
35 educational resources for staff members to implement the pathways. To achieve this  
36 objective, a care pathway implementation support team will be established comprising  
37 members of the research team and key hospital stakeholders. Stakeholders will include a  
38 coalition of both clinical partners, such as clinical education coordinators, and non-clinical  
39 partners, such as hospital administrators, to ensure a wide breadth of expertise are included.  
40  
41 The primary goal for the team will be to act as a vehicle for organisational leadership that  
42 builds capacity in clinical improvement and implementation science methodology. Individual  
43 roles within the team will be clarified across the project to reduce the risk of any duplicative  
44 efforts and improve the visibility of activities across different patient cohorts where pathways  
45  
46  
47  
48  
49  
50  
51  
52  
53  
54  
55  
56  
57  
58  
59  
60

1  
2  
3 will be implemented. The team will meet monthly for the duration of the study to discuss  
4 goals and action items relating to the project to facilitate implementation of the perioperative  
5 pathways. For example, an important aim for the support team will be to reduce the time-  
6 burden for clinicians during pathway implementation and to establish actions that will  
7 minimise potential time pressures.  
8  
9

### 16 *Stage 2: Preparation*

17  
18  
19 The objective of the preparation stage is to use a consensus-building approach to develop and  
20 standardise perioperative care pathways for each surgical cohort, and to use learnings from  
21 the hip and knee replacement surgery cohorts retrospectively to facilitate successful  
22 implementation. During this stage, perioperative pathways will be drafted by a clinician-  
23 researcher in a hospital leadership position (AH) and senior management staff, based on a  
24 combination of 'current' surgeon clinical guidelines and evidence-based practice. Clinical  
25 consensus groups will then be established for each cohort by the clinician-researcher. These  
26 groups will include multidisciplinary representation such as surgeons, anaesthetists, nursing  
27 and allied health, and will be led by the discipline heads. Clinical consensus groups will  
28 attend regular meetings facilitated by the clinician-researcher to discuss components of care  
29 to be included in the standardised perioperative pathways, including acceptable bounds of  
30 variation in practice. The pathways will optimise components of care differently across  
31 cohorts based on current evidence and joint medical decision making, including, but not  
32 limited to, preoperative optimisation, postoperative analgesia, surgical antibiotic prophylaxis,  
33 anticoagulation protocols and mobilisation after surgery. An 'informal' approach will be  
34 utilised to achieve consensus on the perioperative pathways whereby a set of pre-defined  
35 components will be discussed at each meeting and agreed upon by group members using both  
36 evidence and their own perspectives to inform discussion (28). Items will be documented by  
37  
38  
39  
40  
41  
42  
43  
44  
45  
46  
47  
48  
49  
50  
51  
52  
53  
54  
55  
56  
57  
58  
59  
60

1  
2  
3 the facilitator and relevant documentation will be sent to each group member for further  
4  
5 review as required following each meeting. Following this process, pathways will be  
6  
7 circulated by each group member to their individual teams for feedback and critical  
8  
9 modifications will then be made by the consensus groups at additional meetings which will  
10  
11 facilitate implementation during the next two stages.  
12  
13  
14

15  
16 An additional goal of this phase will be to establish consensus from both the taskforce and  
17  
18 clinical consensus groups on a plan to implement the pathways. A draft implementation plan  
19  
20 will be created by the task force. This plan will be reviewed by the clinical consensus groups  
21  
22 for modifications as required and each member will serve as “champions” to drive  
23  
24 implementation. Components of the implementation plan may include education and training  
25  
26 sessions for nursing and allied health and establishing audit and feedback processes on the  
27  
28 wards.  
29  
30  
31

32  
33 A separate stakeholder engagement group will be formed to represent the views of patient  
34  
35 representatives, engage frontline clinical staff in implementation, and facilitate rapid  
36  
37 feedback regarding implementation challenges to the care pathway implementation support  
38  
39 team. Researchers involved in qualitative data collection will observe this process through  
40  
41 naturalistic observation however, they will not have a role in determining components of the  
42  
43 pathways. During this stage, learnings obtained from implementation of pathways for the hip  
44  
45 and knee replacement cohort will also be analysed by the research team to further understand  
46  
47 the process of implementation using a consensus approach.  
48  
49  
50

### 51 52 *Stage 3: Implementation* 53 54

55  
56 In the implementation stage, installation of the care pathways will be guided by the planned  
57  
58 implementation supports formalised in the preparation phase. It will be critical to monitor the  
59  
60

1  
2  
3 implementation process during this stage and adjust supports accordingly. Care pathway  
4  
5 toolkits including education and documentation resources will be finalised and disseminated  
6  
7 to clinical staff and patients at this stage to foster prompt widespread practice change. Further  
8  
9 monitoring of the degree of engagement and cohesion between clinical leadership and  
10  
11 frontline clinical staff will be achieved using participant observations. Particular attention  
12  
13 will be paid to the capacity of frontline clinical staff to absorb and apply new care pathways,  
14  
15 avoiding “bottlenecks” between care pathway development and implementation. This stage  
16  
17 will also be supported by an iterative audit and feedback process and data analytics to  
18  
19 identify gains made and update external benchmarking comparisons over time. Audit and  
20  
21 feedback will relate to process (implementation) outcomes, health services outputs, and  
22  
23 patient-level outcomes and this feedback will be communicated with staff at regular  
24  
25 discipline meetings.  
26  
27  
28  
29  
30

#### 31 *Stage 4: Sustainment*

32  
33  
34  
35 The sustainment stage involves the continued application of the structures and processes of  
36  
37 the care pathways to realise tangible improvements in patient outcomes. At this stage, care  
38  
39 variation reduction becomes a standing item on regular Patient Safety and Quality Committee  
40  
41 meeting agendas. “Roadshow” presentations to the stakeholder engagement groups, frontline  
42  
43 clinical staff and hospital leadership groups can continue bi-directional communication and  
44  
45 feedback loops to identify new areas of care variance prioritised for future care pathways. We  
46  
47 also plan to translate our findings via policy maker round tables and engagement and training  
48  
49 with other private hospitals.  
50  
51  
52  
53  
54  
55  
56  
57  
58  
59  
60

**Table 1** Overview of implementation strategies

| Implementation stage  | Implementation strategy                        | Description                                                                                                                                                                                                              |
|-----------------------|------------------------------------------------|--------------------------------------------------------------------------------------------------------------------------------------------------------------------------------------------------------------------------|
| <i>Exploration</i>    | Build a coalition                              | Recruit and cultivate relationships with partners in the implementation effort by formally establishing a care pathway support team                                                                                      |
| <i>Preparation</i>    | Conduct local consensus discussions            | Establish a structure for local providers and other stakeholders to form cohort-specific clinical consensus groups to discuss the processes of care and standardisation of pathways                                      |
|                       | Co-develop a formal implementation blueprint   | Co-develop a formal blueprint for iterative care pathway prioritisation and implementation                                                                                                                               |
| <i>Implementation</i> | Develop and implement care pathway toolkits    | Develop, test, and introduce quality improvement tools and educational materials                                                                                                                                         |
|                       | Audit and provide feedback                     | Embed a comprehensive system audit around care variation, clinical and process outcomes over specified time periods and disseminate to clinicians and administrators to monitor, evaluate, and modify provider behaviour |
| <i>Sustainment</i>    | Facilitate relay of clinical data to providers | Undertake formal monitoring and evaluation and develop a reporting structure and channels of communication for care pathway development, implementation, and outcomes                                                    |

## Recruitment

### *Semi-structured interviews and focus groups with hospital staff*

A purposive sample of staff who have been previously involved in the development of perioperative pathways or provision of care for the hip and knee replacement surgical cohorts, and staff currently involved in the development and implementation of the new pathways for the four new surgical cohorts will be recruited. Staff will be identified by MUH co-investigators. Research staff not employed by MUH will approach the identified staff

1  
2  
3 members either by email invitation or face-to-face to request their participation in the  
4  
5 interviews, indicating that they have been identified by the research team as a key stakeholder  
6  
7 in the development and implementation of the pathways. This approach is designed to avoid  
8  
9 the potential impact of any existing relationships between hospital staff and co-investigators.  
10  
11 A brief explanation of the study and a written participant information form will be provided  
12  
13 to the staff members. Staff members will be provided with time to review the information and  
14  
15 ask any questions of the research staff prior to their decision to consent to participate in the  
16  
17 interviews and focus groups, or not.  
18  
19  
20  
21  
22

### 23 *Participant observations with hospital staff*

24  
25 Staff attending relevant meetings will be recruited, such as planned support team project  
26  
27 meetings, clinical consensus group meetings, stakeholder engagement group meetings,  
28  
29 patient safety and quality committees, and ward based clinical meetings. Attendance of these  
30  
31 meetings by external staff will be through invitation from hospital co-investigators. Study  
32  
33 information and a participant information form will be provided prior to the initial meeting  
34  
35 where participant observations will take place.  
36  
37  
38  
39

## 40 **OUTCOMES**

### 41 42 43 **Primary outcomes**

44  
45  
46 A summary of the primary outcome measures for this study can be found in Table 2.  
47  
48 Implementation outcomes including acceptability, appropriateness, feasibility, adoption,  
49  
50 fidelity and sustainment, and penetration, will be used to understand the impact of the  
51  
52 implementation strategies and implementation using a consensus-building approach on  
53  
54 secondary outcomes (29).  
55  
56  
57  
58  
59  
60

**Table 2** Summary of primary outcome measures

|                                        |                                                                                                                                                                                                                                                             |
|----------------------------------------|-------------------------------------------------------------------------------------------------------------------------------------------------------------------------------------------------------------------------------------------------------------|
| <b><i>Acceptability</i></b>            | Provider knowledge and satisfaction with aspects of the perioperative pathways and their implementation will be collected via qualitative interviews and participant observation                                                                            |
| <b><i>Appropriateness</i></b>          | Appropriateness will be assessed both retrospectively based on the experiences piloting the intervention for the hip and knee replacement cohorts using qualitative interviews, as well as for the four prospective cohorts using participant observation   |
| <b><i>Feasibility</i></b>              | Feasibility will be measured both retrospectively using pilot data from the hip and knee replacement cohorts and prospectively for the four new cohorts of interest using interviews and participant observation                                            |
| <b><i>Adoption</i></b>                 | Participant observations of the clinical consensus-building process will be used to measure the reasons pertaining to the intention, initial decision, or action to integrate the perioperative care pathways into routine clinical practice                |
| <b><i>Fidelity and sustainment</i></b> | Regular audits of adherence to the care pathways will provide an indication of variations to practice over time, including potential modifications and tailoring of the pathways by frontline staff (e.g., nurses) to better fit within their work routines |



|                           |                                                                                                                                      |
|---------------------------|--------------------------------------------------------------------------------------------------------------------------------------|
| <b><i>Penetration</i></b> | Penetration will be assessed by the number of eligible patients who receive the care pathway as intended according to planned audits |
|---------------------------|--------------------------------------------------------------------------------------------------------------------------------------|

## Secondary outcomes

Secondary outcomes assessed will include both process outcomes and clinical outcomes:

- Hospital or intensive care unit LOS for each cohort will be collected from routine administrative data systems.
- Patient-reported experience measures (PREMs) collected via patient surveys.
- Patient-reported outcome measures (PROMs) collected via patient surveys e.g., health-related quality of life questionnaires.
- Discharge destination collected from routine administrative data systems.
- Hospital-acquired complication rates collected from routine incident reporting systems.
- Hospital readmission rates collected from routine administrative data systems.

Selected PREMs and PROMs for the prostatectomy cohort are currently routinely collected at some site hospitals by specialist nurse practitioners and recorded in the patient's medical records. These include the Prostate Cancer Distress Screen (30), the International Prostate Symptom Score (IPSS) (31), Incontinence Questionnaire-Urinary Incontinence Short Form (32) and the Sexual Health Inventory for Men (33). Research staff will assist with sending out surveys (see Supplementary File 1), prior to the routine six-month follow up assessment for up to 50-100 patients both before and after pathway implementation where patients consent, standardising an existing clinical interaction for comparison. Specific PROMs and PREMs

1  
2  
3 measures for the remaining pathways will be determined during the consensus building  
4 process and if agreed, these measures will only be collected for research purposes where  
5 patients consent, prospectively.  
6  
7  
8  
9

## 10 **Data collection**

### 11 *Qualitative interviews and focus groups*

12  
13  
14  
15  
16 Semi-structured one-on-one interviews or focus groups will be conducted over a 12-month  
17 period with key clinical and non-clinical hospital staff and patient/consumer representatives,  
18 focussing retrospectively on the pilot hip and knee replacement cohorts and prospectively for  
19 each of the four new cohorts. Interview guides will be piloted prior to data collection and will  
20 include questions pertaining to participants knowledge and experiences of implementing the  
21 standardised perioperative pathways, as well as barriers and facilitators to this process (see  
22 Supplementary File 2 and Supplementary File 3 for planned interview guides). Interviews  
23 and focus groups will be conducted by one experienced qualitative researcher (LP) via  
24 videoconference or face-to-face at participants' preferred time and location, lasting between  
25 30-60 minutes. The researcher will conduct all interviews in a private room suited to the  
26 interviewee, where interviews will be digitally recorded and transcribed verbatim. Field notes  
27 will also be made by the interviewer including initial thoughts, interpretations and analysis of  
28 the data collected. Audio and written data will be immediately saved in a password protected  
29 file on an encrypted password protected computer.  
30  
31  
32  
33  
34  
35  
36  
37  
38  
39  
40  
41  
42  
43  
44  
45  
46  
47  
48  
49

### 50 *Qualitative participant observation*

51  
52 Data collectors will conduct naturalistic participant observations within the planned support  
53 team project meetings, clinical consensus group meetings, stakeholder engagement group  
54 meetings, patient safety and quality committee, and ward-based clinical meetings (34). Each  
55 observation session is anticipated to last between one to two hours. Fieldnotes will be taken  
56  
57  
58  
59  
60

1  
2  
3 to spatially contextualise events within the study aims (35). These observations will not be  
4  
5 guided by a pre-determined schedule, but rather, they will inductively evolve in real-world  
6  
7 practice environments. This includes how staff converse with one another, how they plan and  
8  
9 make decisions together about perioperative care (i.e., implementation, communication  
10  
11 pathways, leadership), and how decision-making processes evolve and take shape across  
12  
13 different meetings with different stakeholders.  
14  
15

### 16 17 18 *Quantitative clinical outcomes data*

19  
20  
21 Data on clinical outcomes will be collected from administrative databases. These data include  
22  
23 measures such as hospital LOS, discharge destination, acquired complications, and  
24  
25 readmission. Data from routine administrative databases has high levels of agreement with  
26  
27 the medical record for both length of stay (93%) and discharge destination (91%) data, but  
28  
29 some limitations are acknowledged when capturing acquired complications (36, 37). Those  
30  
31 data not routinely collected within existing administrative databases will be collected  
32  
33 prospectively or via retrospective electronic medical review.  
34  
35  
36  
37  
38

### 39 **Sample size**

40  
41  
42 Qualitative data pertaining to the implementation of the perioperative clinical pathways will  
43  
44 use the concept of theoretical saturation to determine the observation and interview sample  
45  
46 size (38). Based on prior studies, we anticipate conducting 30 interviews and 15-20 meeting  
47  
48 observations (39, 40). Staff will be recruited using convenience time-frame sampling which  
49  
50 removes opportunistic recruitment of staff and patients, and any researcher or hospital  
51  
52 selection bias.  
53  
54  
55

56  
57 For quantitative data, a power calculation was undertaken for each of the four cohorts based  
58  
59 on the mean and standard deviation of LOS for each at a site hospital in the 2020 and 2021  
60

1  
2  
3 financial years, an estimated important reduction in LOS, two sided  $\alpha=0.05$  and 80% power.  
4  
5 For spinal surgery, for example, reduction of mean LOS from 4.28 (SD: 4.66) to 2.78 (the  
6  
7 peer group average) required 152 patients pre- and post-intervention, which is achievable  
8  
9 with twelve months' follow-up. Bariatric surgery, on the other hand, requires only 6 months.  
10  
11 Overall, MUH LOS for cardiac surgery is in line with its peer group, so for this cohort the  
12  
13 target is intensive unit LOS, which is higher than that of peers. The cohorts requiring longer  
14  
15 follow-up periods will be prioritised for earlier intervention where feasible. It is important to  
16  
17 note that the research team does not view LOS as the most important clinical outcome for  
18  
19 these four cohorts; it is used for sample size estimation because it is an administrative  
20  
21 outcome where there is a prospect of measuring relevant quantitative change in the time  
22  
23 available to the study. Moreover, relevant data on means and standard deviations is routinely  
24  
25 available, permitting sample size calculation.  
26  
27  
28  
29  
30

## 31 32 **DATA ANALYSIS**

### 33 34 35 **Qualitative**

#### 36 37 38 *Qualitative interview and observation analysis*

39  
40  
41  
42 Fieldnotes and interview transcripts will be imported into Nvivo20 for data management.

43  
44 Data will be analysed thematically (41, 42) by two experienced qualitative analysts (primary  
45  
46 and secondary) (LP and MS or EFA) working together to ensure the process is rigorous, and  
47  
48 to enable them to discuss the major and minor themes arising inductively and their  
49  
50 concomitant categories until consensus agreement can be achieved. The secondary analyst  
51  
52 will examine a subset of the complete dataset, to ensure methodological veracity during the  
53  
54 analytic process.  
55  
56  
57  
58

### 59 60 **Quantitative**

### *Quantitative analysis of clinical endpoints*

Data will be analysed by three researchers (LP, GA and MNS) using SPSS. Descriptive statistics will be used to summarise demographic data. For LOS, historical data will be sourced from administrative databases to identify any secular trend and take this into account in attributing any pre-post change to intervention. For other clinical outcomes, PREMs and PROMs will be descriptive only and restricted to 50-100 patients from the prostatectomy cohort and any other cohort where these outcomes are available, while hospital acquired complications and hospital readmission rates will be compared pre- and post-intervention. The estimated between-group difference and the 95% confidence intervals (95% CI) will be reported and for significant testing, p values <0.05 will be considered statistically significant.

### **Patient and Public Involvement**

Input and feedback was obtained from the site hospital's Clinical Leadership Committee and the Clinical Disciplines on aspects of the study design, such as the planned implementation strategies and outcome measures. Patients were not involved in the design of this study, however, patient consumer input and feedback will be sought from the site hospital's consumer advisory committee where resources for patients are developed.

### **DISCUSSION**

Translating standardised clinical consensus pathways into current practice has proven complex and challenging. Whilst the efficacy of such pathways on process outcomes, such as LOS and postoperative complications has been well-established, evidence suggests suboptimal implementation into healthcare settings with inconsistent adherence to some recommendations (14, 23, 25, 26, 43). Reported issues with sustainability of new care pathways following implementation further highlight the complexities of this process (44). There is no universal way to implement perioperative pathways of proven efficacy into

1  
2  
3 hospital settings. Studies evaluating the success and effectiveness of care pathways can  
4  
5 provide a basis for service providers however, inconsistent reporting on the methods used for  
6  
7 implementation, as well as barriers and facilitators, make determining the optimal approach  
8  
9 difficult. The focus of this research is to evaluate the process of implementing perioperative  
10  
11 care pathways into a private hospital facility through a consensus-building approach, where  
12  
13 key stakeholders will work together to conduct 'local consensus decisions' (45). The  
14  
15 pragmatic nature of the study will deliberately make use of and augment existing practice  
16  
17 structures, staffing and approaches to implement these consensus pathways. This can provide  
18  
19 valuable insights into implementation during routine clinical practice and is thus, potentially  
20  
21 generalisable and transferrable to similar healthcare contexts.  
22  
23  
24  
25

26  
27 Successful implementation of perioperative care pathways is dependent upon numerous  
28  
29 factors due to the multifaceted nature required for change (46, 47, 48, 49). A thorough  
30  
31 understanding of the social and organisational contexts is required to optimise  
32  
33 implementation into hospital settings and ensure sustainability (49, 50). It is important to  
34  
35 ascertain the views of clinicians and patients involved in implementation to gain a deeper  
36  
37 understanding of the acceptability of the pathway and the use of a consensus-building process  
38  
39 (51). Previous studies examining provider and patient perceptions of implementing ERAS  
40  
41 pathways have reported many barriers to successful implementation (52, 53, 54). Ineffective  
42  
43 communication between team members, lack of hospital resources, increased workload and  
44  
45 negative provider attitudes to the proposed interventions have been cited as key issues that  
46  
47 must be addressed to optimise implementation and sustainability (44, 47, 53). These themes  
48  
49 are not isolated to surgical cohorts alone, with similar themes impacting on implementation  
50  
51 of standardised pathways reported for other areas, such as mental health (47) and asthma  
52  
53  
54  
55  
56  
57 (55).  
58  
59  
60

1  
2  
3 The utilisation of semi-structured interviews with key clinical and non-clinical staff is  
4 designed to provide insight into the attitudes and experiences of the process of  
5  
6 implementation. This will enable an exploration of the barriers and facilitators to successfully  
7  
8 adopting a new standardised process of care. The degree of engagement and cohesion  
9  
10 between clinical leadership and frontline clinical staff will be monitored using participant  
11  
12 observations; with particular attention paid to the capacity of staff to absorb and apply new  
13  
14 care pathways into practice. The inclusion of a variety of staff members from different  
15  
16 disciplines and different surgical cohorts will provide a deeper understanding of the processes  
17  
18 of implementation for a variety of surgical procedures, where different cohorts may have  
19  
20 different views and experiences of implementing consensus-based pathways.  
21  
22  
23  
24  
25  
26

27 The insights obtained through these methods aim to contribute to the growing knowledge  
28  
29 base about the factors that impact upon effective implementation of perioperative pathways  
30  
31 into hospital settings utilising a consensus approach. The application of implementation  
32  
33 science methods and use of the EPIS framework (27) will enable us to characterise the  
34  
35 processes of implementation and evaluate factors that may impact upon implementation at  
36  
37 different phases of the process. This enables forward thinking about sustainability and  
38  
39 optimising implementation in the future by adopting a learning health system model, whereby  
40  
41 reliable outcomes are consistently delivered and improved with each care experience (56).  
42  
43 Other clinical settings may find this knowledge useful to inform integration and adaptations  
44  
45 of similar pathways into routine care to reduce unwarranted variation.  
46  
47  
48  
49  
50

51 **Word count:** 4174 words  
52  
53

54 **List of Abbreviations:**  
55

56 EPIS Exploration, Preparation, Implementation, and Sustainment Framework;  
57  
58  
59  
60

1  
2  
3 ERAS Enhanced Recovery After Surgery;  
4  
5

6 IT Information Technology;  
7  
8

9  
10 LOS Length of stay;  
11  
12

13 MUH Macquarie University Hospital;  
14  
15

16  
17 PREMs Patient-reported experience measures;  
18  
19

20 PROMs Patient-reported outcome measures;  
21  
22

23  
24 SD Standard deviation  
25  
26

27 USA United States of America  
28  
29

### 30 **DECLARATIONS:**

#### 31 **Ethics and dissemination:**

32  
33  
34  
35  
36  
37  
38 Approval to conduct this study has been obtained from the Macquarie University Human  
39  
40 Research Ethics Medical Sciences Committee (Reference No: 520221219542374). Research  
41  
42 governance authorisation has been provided by the MQ Health Clinical Research Executive.  
43

44 A waiver for consent will be sought from participants for data obtained in this study.

45  
46 PROMs/PREMs data being collected for clinical purposes will seek informed patient consent  
47  
48 for de-identified data to be used for research purposes. The findings of this study will be  
49  
50 disseminated through peer-reviewed publications, conference presentations, and summaries  
51  
52 or reports for key stakeholders and partners in the field.  
53  
54  
55

#### 56 **Protocol amendments:**

57  
58  
59  
60



1  
2  
3 Approval from the study investigators, Human Research Ethics Committee, and research  
4  
5 governance will be sought for any protocol amendments. Amendments will be reported in the  
6  
7 published manuscript as a deviation from the protocol.  
8  
9

#### 10 11 **Consent for publication:** 12

13  
14 Not applicable.  
15  
16

#### 17 18 **Availability of data and materials:** 19

20  
21 Data sharing is not applicable to this article as no datasets were generated or analysed during  
22  
23 the current study.  
24  
25

#### 26 27 **Competing interests:** 28

29  
30 The authors declare that they have no competing interests.  
31  
32

#### 33 34 **Funding:** 35

36  
37 This project was funded from the Translational Research Grant Program from the HCF  
38  
39 Research Foundation (CIA Sarkies). The funders were not involved in the design or conduct  
40  
41 of the study. The content is solely the responsibility of the authors and does not necessarily  
42  
43 represent the official view of the HCF Research Foundation. JB reports funding from  
44  
45 multiple sources including the National Health and Medical Research Council: 9100002 and  
46  
47 GNT1176620.  
48  
49  
50

#### 51 52 **Authors' contributions:** 53

54  
55 The study was conceived by MS, AH, EF-A, GA, JCL, JB, GG, PDH, KC, KH, AP, CH, DG,  
56  
57 LAE, LT, and RP and all authors contributed to the study design. LP, CH and MS wrote the  
58  
59  
60

1  
2  
3 initial draft of the manuscript. All authors contributed to and approved the final version of the  
4  
5 manuscript.  
6  
7

### 8 9 **Acknowledgements:**

10  
11  
12 The authors would like to acknowledge the contributions of Macquarie University Hospital,  
13  
14 the members of the clinical standardisation taskforce and the staff that are assisting with the  
15  
16 project.  
17  
18  
19  
20  
21  
22

### 23 **REFERENCES**

- 24  
25  
26 1. Braithwaite J, Glasziou P, Westbrook J. The three numbers you need to know about  
27  
28 healthcare: the 60-30-10 Challenge. *BMC Med* 2020;18(1):102.
- 29  
30  
31 2. Australian Commission on Safety and Quality in Health Care and Australian Institute  
32  
33 of Health and Welfare. *Exploring Healthcare Variation in Australia: Analyses Resulting from*  
34  
35 *an OECD Study*. Sydney: ACSQHC; 2014.
- 36  
37  
38 3. Braithwaite J, Hibbert PD, Jaffe A, et al. Quality of Health Care for Children in  
39  
40 Australia, 2012-2013. *JAMA* 2018;319(11):1113-24.
- 41  
42  
43 4. McGlynn EA, Asch SM, Adams J, et al. The quality of health care delivered to adults  
44  
45 in the United States. *N Engl J Med* 2003;348(26):2635-45.
- 46  
47  
48 5. Mangione-Smith R, DeCristofaro AH, Setodji CM, et al. The quality of ambulatory  
49  
50 care delivered to children in the United States. *N Engl J Med* 2007;357(15):1515-23.
- 51  
52  
53 6. Runciman WB, Hunt TD, Hannaford NA, et al. CareTrack: assessing the  
54  
55 appropriateness of health care delivery in Australia. *Med J Aust* 2012;197(2):100-5.
- 56  
57  
58 7. Sarkies MN, Jones LK, Gidding SS, et al. Improving clinical practice guidelines with  
59  
60 implementation science. *Nature Reviews Cardiology*. 2022;19(1):3-4.

- 1  
2  
3 8. Australian Commission on Safety and Quality in Health Care and Australian Institute  
4 of Health and Welfare. The Fourth Australian Atlas of Healthcare Variation. Sydney:  
5 ACSQHC; 2021.  
6  
7
- 8  
9  
10 9. Royal Australasian College of Surgeons. Rehabilitation Pathways Following Hip and  
11 Knee Arthroplasty [Internet]. Adelaide: Royal Australasian College of Surgeons, 2018 [cited  
12 2023 March 1] Available from [https://www.surgeons.org/en/Resources/reports-guidelines-](https://www.surgeons.org/en/Resources/reports-guidelines-publications/surgical-variance-reports)  
13 [publications/surgical-variance-reports](https://www.surgeons.org/en/Resources/reports-guidelines-publications/surgical-variance-reports).  
14  
15
- 16  
17  
18 10. Australian Institute of Health and Welfare. Australia's hospitals at a glance [Internet]  
19 Canberra:Australian Institute of Health and Welfare, 2022 [cited 2023 Jan 31] Available from  
20 <https://www.aihw.gov.au/reports/hospitals/australias-hospitals-at-a-glance/contents/summary>.  
21  
22  
23
- 24  
25 11. Goodair B, Reeves A. Outsourcing health-care services to the private sector and  
26 treatable mortality rates in England, 2013–20: an observational study of NHS privatisation.  
27 *Lancet Public Health* 2022;7(7):e638-e46.  
28  
29
- 30  
31 12. Sá L, Covre ER, Melo WA, et al. Public-private relationship in surgical  
32 hospitalizations through the Unified Health System. *Rev Lat Am Enfermagem*  
33 2021;29:e3467.  
34  
35  
36
- 37  
38 13. Anderson M. Changes in publicly and privately funded care in England following a  
39 national programme to reduce provision of low-value elective surgery. *Br J Surg*  
40 2023;110(2):209-16.  
41  
42  
43
- 44  
45 14. Rotter T, Kinsman L, James EL, Machotta A, Gothe H, Willis J, et al. Clinical  
46 pathways: effects on professional practice, patient outcomes, length of stay and hospital  
47 costs. *Cochrane database of systematic reviews*. 2010(3).  
48  
49  
50
- 51  
52 15. Harrison R, Hinchcliff RA, Manias E, et al. Can feedback approaches reduce  
53 unwarranted clinical variation? A systematic rapid evidence synthesis. *BMC Health Serv Res*  
54 2020;20(1):40.  
55  
56  
57  
58  
59  
60

16. Harrison R, Manias E, Mears S, et al. Addressing unwarranted clinical variation: a rapid review of current evidence. *J Eval Clin Pract* 2019;25(1):53-65.
17. ERAS Society [Internet]. Enhanced Recovery After Surgery; 2023 [cited 2023 Jun 2023]. Available from: <https://erassociety.org/>.
18. Cline KM, Clement V, Rock-Klotz J, Kash BA, Steel C, Miller TR. Improving the cost, quality, and safety of perioperative care: A systematic review of the literature on implementation of the perioperative surgical home. *J Clin Anesth*. 2020;63:109760.
19. McQueen K, Coonan T, Ottaway A, et al. Anesthesia and Perioperative Care. In: *Essential Surgery: Disease Control Priorities: 3<sup>rd</sup> ed. (Volume 1)*. Washington (DC): The International Bank for Reconstruction and Development / The World Bank; 2015.
20. Gabbay JIM, A. *Practice-Based Evidence for Healthcare: Clinical Mindlines*. 1 ed. London: Routledge; 2010.
21. Braithwaite J. Changing how we think about healthcare improvement. *BMJ*. 2018;361:k2014.
22. Sarkies M, Robinson S, Ludwick T, et al. Understanding implementation science from the standpoint of health organisation and management: an interdisciplinary exploration of selected theories, models and frameworks. *J. Health Manag*. 2021;35(7):782-801.
23. Kurtin P, Stucky E. Standardize to excellence: improving the quality and safety of care with clinical pathways. *Pediat Clin North Am* 2009;56(4):893-904.
24. Heymans MJ, Kort NP, Snoeker BA, Schotanus MG. Impact of enhanced recovery pathways on safety and efficacy of hip and knee arthroplasty: A systematic review and meta-analysis. *World J Orthop* 2022;13(3):307.
25. Kagedan DJ, Ahmed M, Devitt KS, Wei AC. Enhanced recovery after pancreatic surgery: a systematic review of the evidence. *HPB (Oxford)* 2015;17(1):11-6..

- 1  
2  
3 26. Lemmens L, Van Zelm R, Rinkes IB, et al. Clinical and organizational content of  
4 clinical pathways for digestive surgery: a systematic review. *Dig Surg* 2009;26(2):91-9.  
5  
6  
7
- 8 27. Moullin JC, Dickson KS, Stadnick NA, et al. Systematic review of the Exploration,  
9 Preparation, Implementation, Sustainment (EPIS) framework. *Implement Sci* 2019;14(1):1.  
10  
11  
12
- 13 28. World Health Organization. WHO handbook for guideline development. 2nd ed:  
14 World Health Organization; 2014.  
15  
16
- 17 29. Proctor E, Silmere H, Raghavan R, et al. Outcomes for Implementation Research:  
18 Conceptual Distinctions, Measurement Challenges, and Research Agenda. *Adm Policy Ment*  
19 *Health* 2011;38(2):65-76.  
20  
21  
22
- 23 30. Prostate Cancer Foundation of Australia. Screening for Distress [Interent] 2022 [cited  
24 2023 March 3] Available from: [https://www.pcfa.org.au/awareness/for-healthcare-  
25 professionals/screening-for-distress/](https://www.pcfa.org.au/awareness/for-healthcare-professionals/screening-for-distress/).  
26  
27  
28  
29
- 30 31. Barry MJ, Fowler Jr FJ, O'Leary MP, et al. The American Urological Association  
31 symptom index for benign prostatic hyperplasia. *J Urol* 1992;148(5):1549-57.  
32  
33
- 34 32. Avery K, Donovan J, Peters TJ, et al. ICIQ: a brief and robust measure for evaluating  
35 the symptoms and impact of urinary incontinence. *Neurourol Urodyn* 2004;23(4):322-30  
36  
37  
38
- 39 33. Rosen RC, Cappelleri J, Smith M, et al. Development and evaluation of an abridged,  
40 5-item version of the International Index of Erectile Function (IIEF-5) as a diagnostic tool for  
41 erectile dysfunction. *Int J Impot Res* 1999;11(6):319-26.  
42  
43  
44  
45
- 46 34. Rapport F, Auton E, Cartmill J, et al. Fit for purpose? Organisational prOdUctivity  
47 and woRkforce wellbeIng in workSpaces in Hospital (FLOURISH): a multimethod  
48 qualitative study protocol. *BMJ Open* 2019;9(4):e027636  
49  
50  
51  
52
- 53 35. Emerson RM, Fretz RI, Shaw LL. Writing ethnographic fieldnotes. 2nd ed. Chicago:  
54 University of Chicago press; 2011.  
55  
56  
57  
58  
59  
60

- 1  
2  
3 36. Sarkies MN, Bowles K-A, Skinner E, et al. Data collection methods in health services  
4 research. *Appl Clin Inform* 2015;6(01):96-109.  
5  
6  
7 37. Sarkies MN, Bowles KA, Skinner EH, et al. Do daily ward interviews improve  
8 measurement of hospital quality and safety indicators? A prospective observational study. *J*  
9  
10  
11  
12  
13 Eval clin Pract 2016;22(5):792-8.  
14  
15 38. Hennink MM, Kaiser BN, Marconi VC. Code saturation versus meaning saturation:  
16 how many interviews are enough? *Qual Health Res* 2017;27(4):591-608.  
17  
18  
19 39. Hutchinson K, Ryder T, Coleman H, et al. Determining the role and responsibilities of  
20 the community epilepsy nurse in the management of epilepsy. *J clin Nurs* 2022.  
21  
22  
23 40. Rapport F, Francis-Auton E, Cartmill J, et al. A mobile methods pilot study of  
24 surgical spaces: 'fit for purpose? Organisational productivity and workforce wellbeing in  
25 workspaces in hospital' (FLOURISH). *BMC Health Serv Res* 2020;20(1):78.  
26  
27  
28  
29 41. Braun V, Clarke V. Reflecting on reflexive thematic analysis. *Qualitative research in*  
30 sport, exercise and health. 2019;11(4):589-97.  
31  
32  
33 42. Clarke V, Braun V. Thematic analysis. In: Michalos, A.C. (eds) *Encyclopaedia of*  
34 *quality of life and well-being research*. Netherlands: Springer; 2014.  
35  
36  
37 43. Simmons JM, Kotagal UR. Reliable implementation of clinical pathways: what will it  
38 take—that is the question. *J Pediatr* 2008;152(3):303-4.  
39  
40  
41 44. Evans-Lacko S, Jarrett M, McCrone P, et al. Facilitators and barriers to implementing  
42 clinical care pathways. *BMC Health Serv Res* 2010;10:182.  
43  
44  
45 45. Powell BJ, Waltz TJ, Chinman MJ, Damschroder LJ, Smith JL, Matthieu MM, et al.  
46 A refined compilation of implementation strategies: results from the Expert  
47  
48  
49  
50  
51  
52  
53  
54  
55  
56  
57  
58  
59  
60  
60 Recommendations for Implementing Change (ERIC) project. *Implement Sci* 2015;10(1):21..  
46. Fischer F, Lange K, Klose K, et al. Barriers and strategies in guideline  
implementation—a scoping review. *Healthcare (Basel)* 2016;4(3):36..

- 1  
2  
3 47. Jabbour M, Newton AS, Johnson D, Curran JA. Defining barriers and enablers for  
4  
5 clinical pathway implementation in complex clinical settings. *Implement Sci*.13(1):139.  
6  
7  
8 48. Pearsall EA, McLeod RS. Enhanced recovery after surgery: implementation  
9  
10 strategies, barriers and facilitators. *Surgical Clinics* 2018;98(6):1201-10.  
11  
12  
13 49. McArthur C, Bai Y, Hewston P, et al. Barriers and facilitators to implementing  
14  
15 evidence-based guidelines in long-term care: a qualitative evidence synthesis. *Implement Sci*  
16  
17 2021;16(1):1-25.  
18  
19  
20 50. Sarkies MN, Francis-Auton E, Long JC, et al. Making implementation science more  
21  
22 real. *BMC Med Res Methodol* 2022;22(1):178.  
23  
24  
25 51. Pinnock H, Epiphaniou E, Taylor SJ. Phase IV implementation studies. The forgotten  
26  
27 finale to the complex intervention methodology framework. *Ann Am Thorac Soc*  
28  
29 2014;11(Supplement 2):S118-S22.  
30  
31  
32 52. Stone AB, Yuan CT, Rosen MA, et al. Barriers to and Facilitators of Implementing  
33  
34 Enhanced Recovery Pathways Using an Implementation Framework: A Systematic Review.  
35  
36 *JAMA Surgery*. 2018;153(3):270-9.  
37  
38  
39 53. Lyon A, Solomon MJ, Harrison JD. A qualitative study assessing the barriers to  
40  
41 implementation of enhanced recovery after surgery. *World J Surg* 2014;38:1374-80.  
42  
43  
44 54. Alawadi ZM, Leal I, Phatak UR, et al. Facilitators and barriers of implementing  
45  
46 enhanced recovery in colorectal surgery at a safety net hospital: a provider and patient  
47  
48 perspective. *Surgery* 2016;159(3):700-12  
49  
50  
51 55. Sharpe H, Potestio M, Cave A, et al. Facilitators and barriers to the implementation of  
52  
53 the Primary Care Asthma Paediatric Pathway: a qualitative analysis. *BMJ open*.  
54  
55 2022;12(5):e058950.  
56  
57  
58 56. Ellis LA, Sarkies M, Churruca K, et al. The science of learning health systems:  
59  
60 scoping review of empirical research. *JMIR Med Inform* 2022;10(2):e34907.

1  
2  
3  
4  
5  
6  
7  
8  
9  
10  
11  
12  
13  
14  
15  
16  
17  
18  
19  
20  
21  
22  
23  
24  
25  
26  
27  
28  
29  
30  
31  
32  
33  
34  
35  
36  
37  
38  
39  
40  
41  
42  
43  
44  
45  
46  
47  
48  
49  
50  
51  
52  
53  
54  
55  
56  
57  
58  
59  
60

For peer review only



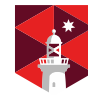

## PROSTATE CANCER DISTRESS SCREEN

The experience of prostate cancer is for many men a difficult time. I would like to ask you a few brief questions to check how you have been feeling and ask about your main concerns. Thinking about how you have been feeling over the past week including today, how distressed do you feel on a scale of '0', no distress to '10', extreme distress? (circle)

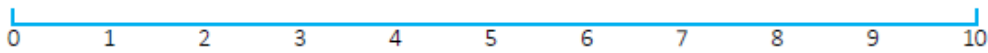

No distress

Extreme distress

This is a list of problems that some men with prostate cancer experience. Do any of these problems apply to you? (Read the list below, tick if yes)

### Practical Problems

- Work
- Financial/Insurance

### Family Problems

- Partner

### Emotional Problems

- Depression
- Uncertainty about the future
- Nervousness
- Sadness
- Worry
- Loss of interest in usual activities

### Treatment Problems

- Understanding treatments
- Making a decision
- Information about my illness

### Physical Problems

- Pain
- Fatigue
- Sexual
- Urinary
- Bowel
- Hot Flashes
- Weight Gain
- Weight Loss
- Loss of Muscle Mass
- Memory/Concentration
- Sleep

### Other Problems (please list)

---



---



---

Which of these are the **most important concerns** for you right now? (Please list)

---

Which of these concerns would you like help with?

---

For men with a rating of  $\geq 4$  consider further assessment and referral to appropriate support services.

Person completing form:

Date: \_\_\_ / \_\_\_ / \_\_\_

1  
2  
3  
4  
5  
6  
7  
8  
9  
10  
11  
12  
13  
14  
15  
16  
17  
18  
19  
20  
21  
22

**ICIQ-UI-SF: CONFIDENTIAL**

Many people leak urine some of the time. We are trying to find out how many people leak urine, and how much this bothers them. We would be grateful if you could answer the following questions, thinking about how you have been, on average, over the PAST FOUR WEEKS.

23  
24  
25  
26  
27  
28  
29  
30  
31  
32  
33  
34  
35  
36  
37  
38  
39  
40  
41  
42  
43  
44  
45  
46  
47  
48  
49  
50  
51  
52  
53  
54  
55  
56  
57  
58  
59  
60

**1. How often do you leak urine? (Tick one box)**

- never
- about once a week or less often
- two or three times a week
- about once a day
- several times a day
- all the time

**2. We would like to know how much urine you think leaks. How much urine do you usually leak (whether you wear protection or not)? (Tick one box)**

- none
- a small amount
- a moderate amount
- a large amount

**3. Overall how much does leaking urine interfere with your everyday life?**

*Please circle a number between 0 (not at all) and 10 (a great deal)*

- 0    1    2    3    4    5    6    7    8    9    10
- not at all a great deal

**4. When does urine leak? (Please tick all that apply to you)**

- never – urine does not leak
- leaks before you can get to the toilet
- leaks when you cough or sneeze
- leaks when you are asleep
- leaks when you are physically active/exercising
- leaks when you have finished urinating and are dressed
- leaks for no obvious reason
- leaks all the time

**Thank you very much for answering these questions.**

Copyright © “ICIQ Group”

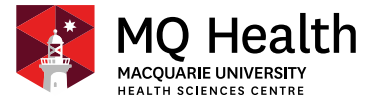

### International Prostate Symptom Score (IPSS)

Patient Name: \_\_\_\_\_ Date of Birth: \_\_\_\_\_ Age: \_\_\_\_\_ Today's Date: \_\_\_\_\_

**Determine Your BPH Symptoms**      Circle your answers and add up your scores at the bottom.

| Over the past month                                                                                                                                       | Not at all | Less than one time in five | Less than half the time | About half the time | More than half the time | Almost always              |
|-----------------------------------------------------------------------------------------------------------------------------------------------------------|------------|----------------------------|-------------------------|---------------------|-------------------------|----------------------------|
| <b>Incomplete emptying-</b> How often have you had the sensation of not emptying your bladder completely after you finished urinating?                    | 0          | 1                          | 2                       | 3                   | 4                       | 5                          |
| <b>Frequency-</b> How often have you had to urinate again less than two hours after you finished urinating?                                               | 0          | 1                          | 2                       | 3                   | 4                       | 5                          |
| <b>Intermittency-</b> How often you have found you stopped and started again several times when you urinated?                                             | 0          | 1                          | 2                       | 3                   | 4                       | 5                          |
| <b>Urgency-</b> How often have you found it difficult to postpone urination?                                                                              | 0          | 1                          | 2                       | 3                   | 4                       | 5                          |
| <b>Weak stream-</b> How often have you had a weak urinary stream?                                                                                         | 0          | 1                          | 2                       | 3                   | 4                       | 5                          |
| <b>Straining-</b> How often have you had to push or strain to begin urination?                                                                            | 0          | 1                          | 2                       | 3                   | 4                       | 5                          |
| <b>Sleeping-</b> How many times did you most typically get up to urinate from the time you went to bed at night until the time you got up in the morning? | None<br>0  | One<br>Time<br>1           | Two<br>Times<br>2       | Three<br>Times<br>3 | Four<br>Times<br>4      | Five or More<br>Times<br>5 |
| <b>Add Symptom Scores:</b>                                                                                                                                |            | +                          | +                       | +                   | +                       | +                          |

Total International Prostate Symptom Score= \_\_\_\_\_

1-7 mild symptoms   -   8-19 moderate symptoms   -   20-35 severe symptoms

Regardless of the score, if your symptoms are bothersome you should notify your doctor.

| Quality of Life (QoL)                                                                                                         | Delighted | Pleased | Mostly Satisfied | Mixed | Mostly Dissatis- | Unhappy | Terrible |
|-------------------------------------------------------------------------------------------------------------------------------|-----------|---------|------------------|-------|------------------|---------|----------|
| If you were to spend the rest of your life with your urinary condition just the way it is now, how would you feel about that? | 0         | 1       | 2                | 3     | 4                | 5       | 6        |

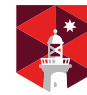

## Sexual Health Inventory for Men (SHIM)

### Instructions

Each question has five possible responses. Circle the number that best describes your own situation. Select only one answer for each question.

### Over the last six months:

---

**1. How do you rate your confidence that you could keep an erection?**

|          |     |          |      |           |
|----------|-----|----------|------|-----------|
| 1        | 2   | 3        | 4    | 5         |
| Very low | Low | Moderate | High | Very high |

---

**2. When you had erections with sexual stimulation, how often were your erections hard enough for penetration (entering your partner)?**

|                       |                                            |                                 |                                      |                         |
|-----------------------|--------------------------------------------|---------------------------------|--------------------------------------|-------------------------|
| 1                     | 2                                          | 3                               | 4                                    | 5                       |
| Almost never or never | A few times (much less than half the time) | Sometimes (about half the time) | Most times (more than half the time) | Almost always or always |

---

**3. During sexual intercourse, how often were you able to maintain your erection after you had penetrated (entered) your partner?**

|                       |                                            |                                 |                                      |                         |
|-----------------------|--------------------------------------------|---------------------------------|--------------------------------------|-------------------------|
| 1                     | 2                                          | 3                               | 4                                    | 5                       |
| Almost never or never | A few times (much less than half the time) | Sometimes (about half the time) | Most times (more than half the time) | Almost always or always |

---

**4. During sexual intercourse, how difficult was it to maintain your erection to completion of intercourse?**

|                     |                |           |                    |               |
|---------------------|----------------|-----------|--------------------|---------------|
| 1                   | 2              | 3         | 4                  | 5             |
| Extremely difficult | Very difficult | Difficult | Slightly difficult | Not difficult |

---

**5. When you attempted sexual intercourse, how often was it satisfactory for you?**

|                       |                                            |                                 |                                      |                         |
|-----------------------|--------------------------------------------|---------------------------------|--------------------------------------|-------------------------|
| 1                     | 2                                          | 3                               | 4                                    | 5                       |
| Almost never or never | A few times (much less than half the time) | Sometimes (about half the time) | Most times (more than half the time) | Almost always or always |

---

## SUPPLEMENTARY FILE 2

### Topic Guide: Staff interviews

|                               |                                                                                                                                                                                                                                 |
|-------------------------------|---------------------------------------------------------------------------------------------------------------------------------------------------------------------------------------------------------------------------------|
| <b>Title</b>                  | Implementation of evidence and consensus-based perioperative care pathways                                                                                                                                                      |
| <b>Principal Investigator</b> | Dr Mitchell Sarkies, Senior Research Fellow and NHMRC Emerging Leadership Fellow, Australian Institute of Health Innovation, Macquarie University<br><a href="mailto:mitchell.sarkies@mq.edu.au">mitchell.sarkies@mq.edu.au</a> |
| <b>Co-investigators</b>       | A/Prof Andrew Hirschhorn, Prof Jeffrey Braithwaite, Dr Gaston Arnolda, Dr Emilie Francis-Auton, Dr Janet Long, Ms Lisa Pagano                                                                                                   |

The semi-structured interviews will be conducted retrospectively for key clinical and non-clinical hospital staff who were previously involved in the development of perioperative pathways for the elective hip and knee replacement surgical cohorts; and prospectively for staff currently involved in the development and implementation of new pathways. The aims of the interview are to:

- Determine the experiences of staff involved in implementing standardised peri-operative pathways.
- Explore the stakeholder knowledge of the care pathways within the hospital setting.
- Assess the integrity, fidelity to and feasibility of the intervention.
- To understand the key barriers and facilitators to implementation of standardised peri-operative pathways from the perspective of both clinical and non-clinical hospital staff.
- To synthesize data from both patient groups to gain a broader understanding of how standardised care pathways are implemented and the impact of these pathways.

#### QUESTIONS:

1  
2  
3 *Thank you for taking part in this interview to examine the implementation of standardised*  
4 *peri-operative surgical pathways at Macquarie University Hospital. The questions will focus*  
5 *on your experiences, familiarity with the pathway, perspective on whether they're being*  
6 *adhered to, and any barriers or facilitators to their implementation.*

7  
8  
9  
10  
11 *Participation in this interview is voluntary and if at any time you do not wish to continue,*  
12 *please let me know. Participation or refusal to participate will not affect your employment.*

13  
14  
15 *With your permission, this interview will be audio recorded so that it can be transcribed and*  
16 *analysed. Do you have any questions before we start?*

17  
18  
19  
20  
21  
22 1. Demographic questions:

- 23  
24 - Can you please introduce yourself and your role at Macquarie University Hospital?  
25  
26 - How long have you worked in healthcare?  
27  
28 - How many of those have been at Macquarie University Hospital?  
29  
30

31  
32  
33  
34  
35  
36  
37 2. What was your experience/what has been your experience implementing the  
38 [SURGICAL COHORT] peri-operative pathway/s?  
39  
40  
41  
42  
43  
44  
45  
46  
47  
48

49 3. How familiar are you with the particulars of the clinical pathway/s? Can you talk  
50 through some of the changes from previous practice?  
51

- 52  
53 - What worked?  
54  
55 - What didn't work  
56  
57  
58  
59  
60

1  
2  
3 4. What are your views on the standardised clinical pathways that were  
4  
5 implemented/are being implemented?  
6

- 7  
8 - Strengths  
9  
10 - Weaknesses  
11

12  
13  
14  
15  
16  
17  
18 5. Did you and other clinicians tend to follow the new processes/procedures?  
19

- 20 - Why do think that is?  
21  
22

23  
24  
25 6. What challenges, if any, did you encounter in implementing the clinical pathways?  
26  
27  
28  
29

30 Prompts;

- 31  
32 - Workload and time  
33  
34 - Staffing  
35  
36 - Personal preference/views  
37  
38 - Inter-professional collaboration  
39  
40 - Other  
41  
42  
43  
44

45 7. What was important to facilitating the implementation of the clinical pathways?  
46  
47  
48  
49

50 Prompts;

- 51  
52 - Organisation  
53  
54 - Resources  
55  
56 - Staffing/Inter-professional collaboration  
57  
58 - Support/Monitoring of fidelity/quality  
59  
60

1  
2  
3 - Other  
4  
5  
6  
7

8 8. Were there any other lessons learned about implementing standardised clinical  
9 pathways?  
10  
11  
12  
13  
14  
15  
16

17 *Additional probing question:*  
18

19 9. What are your suggestions to improve future implementation of standardised clinical  
20 pathways for [SURGICAL COHORT] surgery?  
21  
22  
23  
24  
25  
26  
27  
28  
29

30 10. What do you see as the effects and value of implementing standardised clinical  
31 pathways for [SURGICAL COHORT] surgery?  
32  
33  
34  
35  
36  
37  
38  
39  
40

41 11. Overall, how feasible is/was it to implement standardised clinical pathways for  
42 [SURGICAL COHORT] surgery at Macquarie University Hospital or private hospital  
43 settings more generally?  
44  
45  
46  
47  
48  
49  
50  
51  
52  
53  
54

55 12. Is there anything else you would like to add that has not been covered here?  
56  
57  
58  
59  
60



## Topic Guide: Surgeons

|                               |                                                                                                                                                                                                                                 |
|-------------------------------|---------------------------------------------------------------------------------------------------------------------------------------------------------------------------------------------------------------------------------|
| <b>Title</b>                  | Implementation of evidence and consensus-based perioperative care pathways                                                                                                                                                      |
| <b>Principal Investigator</b> | Dr Mitchell Sarkies, Senior Research Fellow and NHMRC Emerging Leadership Fellow, Australian Institute of Health Innovation, Macquarie University<br><a href="mailto:mitchell.sarkies@mq.edu.au">mitchell.sarkies@mq.edu.au</a> |
| <b>Co-investigators</b>       | A/Prof Andrew Hirschhorn, Prof Jeffrey Braithwaite, Dr Gaston Arnolda, Dr Emilie Francis-Auton, Dr Janet Long, Ms Lisa Pagano                                                                                                   |

The semi-structured interviews will be conducted retrospectively for key clinical and non-clinical hospital staff who were previously involved in the development of perioperative pathways for the elective hip and knee replacement surgical cohorts; and prospectively for staff currently involved in the development and implementation of new pathways. The aims of the interview are to:

- Determine the experiences of staff involved in implementing standardised peri-operative pathways.
- Explore the stakeholder knowledge of the care pathways within the hospital setting.
- Assess the integrity, fidelity to and feasibility of the intervention.
- To understand the key barriers and facilitators to implementation of standardised peri-operative pathways from the perspective of both clinical and non-clinical hospital staff.
- To synthesize data from both patient groups to gain a broader understanding of how standardised care pathways are implemented and the impact of these pathways.

### QUESTIONS:

1. Demographic questions:
  - Can you please introduce yourself and your role at Macquarie University Hospital?
  - How long have you worked in healthcare?
  - How many of those have been at Macquarie University Hospital?
  - *Can ask further about elements of their role as needed*

- 1  
2  
3  
4  
5  
6  
7  
8 2. What was your experience/what has been your experience implementing the  
9 [SURGICAL COHORT] peri-operative pathway/s?  
10  
11  
12  
13  
14  
15  
16  
17 3. How familiar are you with the particulars of the clinical pathway/s? Can you talk  
18 through some of the changes from previous practice?  
19  
20 • What worked?  
21 • What didn't work?  
22  
23  
24  
25  
26  
27 4. What are your views on the standardised clinical pathways that were  
28 implemented/are being implemented?  
29  
30 • Strengths  
31 • Weaknesses  
32  
33  
34  
35  
36 5. What are your perceptions of why MQ health was looking to standardise pathways?  
37 Alternate question - What do you think about the organisation's approach to try to  
38 reduce clinical variation through standardising clinical pathways?  
39  
40  
41

42 Prompt – do you see clinical variation as being an issue?  
43  
44  
45  
46

- 47 6. Option 1: What challenges, if any, did you encounter in implementing the clinical  
48 pathways?  
49  
50

51  
52 Option 2: What challenges do you think clinicians would face when attempting to  
53 implement consensus-based clinical pathways?  
54  
55

56 Prompts;  
57

- 58 • Workload and time  
59 • Staffing  
60

- 1
  - 2
  - 3
  - 4
  - 5
  - 6
  - 7
  - 8
  - 9
  - 10
  - 11
  - 12
  - 13
  - 14
  - 15
  - 16
  - 17
  - 18
  - 19
  - 20
  - 21
  - 22
  - 23
  - 24
  - 25
  - 26
  - 27
  - 28
  - 29
  - 30
  - 31
  - 32
  - 33
  - 34
  - 35
  - 36
  - 37
  - 38
  - 39
  - 40
  - 41
  - 42
  - 43
  - 44
  - 45
  - 46
  - 47
  - 48
  - 49
  - 50
  - 51
  - 52
  - 53
  - 54
  - 55
  - 56
  - 57
  - 58
  - 59
  - 60
- Personal preference/views/autonomy
  - Inter-professional collaboration
  - Other

7. Option 1: What was important to facilitating the implementation of the clinical pathways?

Prompts;

- Organisation
- Resources
- Staffing/Inter-professional collaboration
- Support/Monitoring of fidelity/quality
- Other

8. What do you see as the effects and value of implementing standardised clinical pathways for [SURGICAL COHORT] surgery?

9. How would you measure the success of a clinical pathway of the [SURGICAL] clinical cohort?

10. Overall, how feasible is/was it to implement standardised clinical pathways for [SURGICAL COHORT] surgery at Macquarie University Hospital or private hospital settings more generally?

11. Is there anything else you would like to add that has not been covered here?

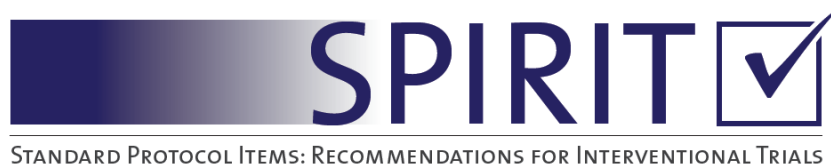

SPIRIT 2013 Checklist: Recommended items to address in a clinical trial protocol and related documents\*

| Section/item                      | Item No | Description                                                                                                                                                                                                                                                                              | Page No.        |
|-----------------------------------|---------|------------------------------------------------------------------------------------------------------------------------------------------------------------------------------------------------------------------------------------------------------------------------------------------|-----------------|
| <b>Administrative information</b> |         |                                                                                                                                                                                                                                                                                          |                 |
| Title                             | 1       | Descriptive title identifying the study design, population, interventions, and, if applicable, trial acronym                                                                                                                                                                             | 1               |
| Trial registration                | 2a      | Trial identifier and registry name. If not yet registered, name of intended registry                                                                                                                                                                                                     | N/A             |
|                                   | 2b      | All items from the World Health Organization Trial Registration Data Set                                                                                                                                                                                                                 | N/A             |
| Protocol version                  | 3       | Date and version identifier                                                                                                                                                                                                                                                              | Ethics protocol |
| Funding                           | 4       | Sources and types of financial, material, and other support                                                                                                                                                                                                                              | 23              |
| Roles and responsibilities        | 5a      | Names, affiliations, and roles of protocol contributors                                                                                                                                                                                                                                  | 1               |
|                                   | 5b      | Name and contact information for the trial sponsor                                                                                                                                                                                                                                       | N/A             |
|                                   | 5c      | Role of study sponsor and funders, if any, in study design; collection, management, analysis, and interpretation of data; writing of the report; and the decision to submit the report for publication, including whether they will have ultimate authority over any of these activities | 23              |
|                                   | 5d      | Composition, roles, and responsibilities of the coordinating centre, steering committee, endpoint adjudication committee, data management team, and other individuals or groups overseeing the trial, if applicable (see Item 21a for data monitoring committee)                         | 23              |
| <b>Introduction</b>               |         |                                                                                                                                                                                                                                                                                          |                 |
| Background and rationale          | 6a      | Description of research question and justification for undertaking the trial, including summary of relevant studies (published and unpublished) examining benefits and harms for each intervention                                                                                       | 4-6             |
|                                   | 6b      | Explanation for choice of comparators                                                                                                                                                                                                                                                    | N/A             |
| Objectives                        | 7       | Specific objectives or hypotheses                                                                                                                                                                                                                                                        | 6               |

|    |                                                                     |     |                                                                                                                                                                                                                                                                                                                                                                                |       |
|----|---------------------------------------------------------------------|-----|--------------------------------------------------------------------------------------------------------------------------------------------------------------------------------------------------------------------------------------------------------------------------------------------------------------------------------------------------------------------------------|-------|
| 1  |                                                                     |     |                                                                                                                                                                                                                                                                                                                                                                                |       |
| 2  | Trial design                                                        | 8   | Description of trial design including type of trial (eg, parallel group, crossover, factorial, single group), allocation ratio, and framework (eg, superiority, equivalence, noninferiority, exploratory)                                                                                                                                                                      | 6-7   |
| 3  |                                                                     |     |                                                                                                                                                                                                                                                                                                                                                                                |       |
| 4  |                                                                     |     |                                                                                                                                                                                                                                                                                                                                                                                |       |
| 5  |                                                                     |     |                                                                                                                                                                                                                                                                                                                                                                                |       |
| 6  |                                                                     |     |                                                                                                                                                                                                                                                                                                                                                                                |       |
| 7  |                                                                     |     |                                                                                                                                                                                                                                                                                                                                                                                |       |
| 8  | <b>Methods: Participants, interventions, and outcomes</b>           |     |                                                                                                                                                                                                                                                                                                                                                                                |       |
| 9  |                                                                     |     |                                                                                                                                                                                                                                                                                                                                                                                |       |
| 10 | Study setting                                                       | 9   | Description of study settings (eg, community clinic, academic hospital) and list of countries where data will be collected. Reference to where list of study sites can be obtained                                                                                                                                                                                             | 7     |
| 11 |                                                                     |     |                                                                                                                                                                                                                                                                                                                                                                                |       |
| 12 |                                                                     |     |                                                                                                                                                                                                                                                                                                                                                                                |       |
| 13 |                                                                     |     |                                                                                                                                                                                                                                                                                                                                                                                |       |
| 14 | Eligibility criteria                                                | 10  | Inclusion and exclusion criteria for participants. If applicable, eligibility criteria for study centres and individuals who will perform the interventions (eg, surgeons, psychotherapists)                                                                                                                                                                                   | 7-8   |
| 15 |                                                                     |     |                                                                                                                                                                                                                                                                                                                                                                                |       |
| 16 |                                                                     |     |                                                                                                                                                                                                                                                                                                                                                                                |       |
| 17 |                                                                     |     |                                                                                                                                                                                                                                                                                                                                                                                |       |
| 18 |                                                                     |     |                                                                                                                                                                                                                                                                                                                                                                                |       |
| 19 | Interventions                                                       | 11a | Interventions for each group with sufficient detail to allow replication, including how and when they will be administered                                                                                                                                                                                                                                                     | 8-12  |
| 20 |                                                                     |     |                                                                                                                                                                                                                                                                                                                                                                                |       |
| 21 |                                                                     |     |                                                                                                                                                                                                                                                                                                                                                                                |       |
| 22 |                                                                     | 11b | Criteria for discontinuing or modifying allocated interventions for a given trial participant (eg, drug dose change in response to harms, participant request, or improving/worsening disease)                                                                                                                                                                                 | N/A   |
| 23 |                                                                     |     |                                                                                                                                                                                                                                                                                                                                                                                |       |
| 24 |                                                                     |     |                                                                                                                                                                                                                                                                                                                                                                                |       |
| 25 |                                                                     |     |                                                                                                                                                                                                                                                                                                                                                                                |       |
| 26 |                                                                     | 11c | Strategies to improve adherence to intervention protocols, and any procedures for monitoring adherence (eg, drug tablet return, laboratory tests)                                                                                                                                                                                                                              | 9-12  |
| 27 |                                                                     |     |                                                                                                                                                                                                                                                                                                                                                                                |       |
| 28 |                                                                     |     |                                                                                                                                                                                                                                                                                                                                                                                |       |
| 29 |                                                                     |     |                                                                                                                                                                                                                                                                                                                                                                                |       |
| 30 |                                                                     |     |                                                                                                                                                                                                                                                                                                                                                                                |       |
| 31 |                                                                     | 11d | Relevant concomitant care and interventions that are permitted or prohibited during the trial                                                                                                                                                                                                                                                                                  | N/A   |
| 32 |                                                                     |     |                                                                                                                                                                                                                                                                                                                                                                                |       |
| 33 |                                                                     |     |                                                                                                                                                                                                                                                                                                                                                                                |       |
| 34 | Outcomes                                                            | 12  | Primary, secondary, and other outcomes, including the specific measurement variable (eg, systolic blood pressure), analysis metric (eg, change from baseline, final value, time to event), method of aggregation (eg, median, proportion), and time point for each outcome. Explanation of the clinical relevance of chosen efficacy and harm outcomes is strongly recommended | 13-17 |
| 35 |                                                                     |     |                                                                                                                                                                                                                                                                                                                                                                                |       |
| 36 |                                                                     |     |                                                                                                                                                                                                                                                                                                                                                                                |       |
| 37 |                                                                     |     |                                                                                                                                                                                                                                                                                                                                                                                |       |
| 38 |                                                                     |     |                                                                                                                                                                                                                                                                                                                                                                                |       |
| 39 |                                                                     |     |                                                                                                                                                                                                                                                                                                                                                                                |       |
| 40 |                                                                     |     |                                                                                                                                                                                                                                                                                                                                                                                |       |
| 41 |                                                                     |     |                                                                                                                                                                                                                                                                                                                                                                                |       |
| 42 |                                                                     |     |                                                                                                                                                                                                                                                                                                                                                                                |       |
| 43 | Participant timeline                                                | 13  | Time schedule of enrolment, interventions (including any run-ins and washouts), assessments, and visits for participants. A schematic diagram is highly recommended (see Figure)                                                                                                                                                                                               | 16-17 |
| 44 |                                                                     |     |                                                                                                                                                                                                                                                                                                                                                                                |       |
| 45 |                                                                     |     |                                                                                                                                                                                                                                                                                                                                                                                |       |
| 46 |                                                                     |     |                                                                                                                                                                                                                                                                                                                                                                                |       |
| 47 |                                                                     |     |                                                                                                                                                                                                                                                                                                                                                                                |       |
| 48 | Sample size                                                         | 14  | Estimated number of participants needed to achieve study objectives and how it was determined, including clinical and statistical assumptions supporting any sample size calculations                                                                                                                                                                                          | 17-18 |
| 49 |                                                                     |     |                                                                                                                                                                                                                                                                                                                                                                                |       |
| 50 |                                                                     |     |                                                                                                                                                                                                                                                                                                                                                                                |       |
| 51 |                                                                     |     |                                                                                                                                                                                                                                                                                                                                                                                |       |
| 52 |                                                                     |     |                                                                                                                                                                                                                                                                                                                                                                                |       |
| 53 |                                                                     |     |                                                                                                                                                                                                                                                                                                                                                                                |       |
| 54 | Recruitment                                                         | 15  | Strategies for achieving adequate participant enrolment to reach target sample size                                                                                                                                                                                                                                                                                            | 17-18 |
| 55 |                                                                     |     |                                                                                                                                                                                                                                                                                                                                                                                |       |
| 56 |                                                                     |     |                                                                                                                                                                                                                                                                                                                                                                                |       |
| 57 | <b>Methods: Assignment of interventions (for controlled trials)</b> |     |                                                                                                                                                                                                                                                                                                                                                                                |       |
| 58 |                                                                     |     |                                                                                                                                                                                                                                                                                                                                                                                |       |
| 59 | Allocation:                                                         |     |                                                                                                                                                                                                                                                                                                                                                                                |       |
| 60 |                                                                     |     |                                                                                                                                                                                                                                                                                                                                                                                |       |

|    |                                                           |     |                                                                    |       |
|----|-----------------------------------------------------------|-----|--------------------------------------------------------------------|-------|
| 1  |                                                           |     |                                                                    |       |
| 2  | Sequence                                                  | 16a | Method of generating the allocation sequence (eg, computer-        | N/A   |
| 3  | generation                                                |     | generated random numbers), and list of any factors for             |       |
| 4  |                                                           |     | stratification. To reduce predictability of a random sequence,     |       |
| 5  |                                                           |     | details of any planned restriction (eg, blocking) should be        |       |
| 6  |                                                           |     | provided in a separate document that is unavailable to those       |       |
| 7  |                                                           |     | who enrol participants or assign interventions                     |       |
| 8  |                                                           |     |                                                                    |       |
| 9  |                                                           |     |                                                                    |       |
| 10 | Allocation                                                | 16b | Mechanism of implementing the allocation sequence (eg,             | N/A   |
| 11 | concealment                                               |     | central telephone; sequentially numbered, opaque, sealed           |       |
| 12 | mechanism                                                 |     | envelopes), describing any steps to conceal the sequence           |       |
| 13 |                                                           |     | until interventions are assigned                                   |       |
| 14 |                                                           |     |                                                                    |       |
| 15 | Implementation                                            | 16c | Who will generate the allocation sequence, who will enrol          | N/A   |
| 16 |                                                           |     | participants, and who will assign participants to interventions    |       |
| 17 |                                                           |     |                                                                    |       |
| 18 |                                                           |     |                                                                    |       |
| 19 | Blinding                                                  | 17a | Who will be blinded after assignment to interventions (eg, trial   | N/A   |
| 20 | (masking)                                                 |     | participants, care providers, outcome assessors, data              |       |
| 21 |                                                           |     | analysts), and how                                                 |       |
| 22 |                                                           |     |                                                                    |       |
| 23 |                                                           | 17b | If blinded, circumstances under which unblinding is                | N/A   |
| 24 |                                                           |     | permissible, and procedure for revealing a participant's           |       |
| 25 |                                                           |     | allocated intervention during the trial                            |       |
| 26 |                                                           |     |                                                                    |       |
| 27 |                                                           |     |                                                                    |       |
| 28 | <b>Methods: Data collection, management, and analysis</b> |     |                                                                    |       |
| 29 |                                                           |     |                                                                    |       |
| 30 | Data collection                                           | 18a | Plans for assessment and collection of outcome, baseline, and      | 15-17 |
| 31 | methods                                                   |     | other trial data, including any related processes to promote       |       |
| 32 |                                                           |     | data quality (eg, duplicate measurements, training of              |       |
| 33 |                                                           |     | assessors) and a description of study instruments (eg,             |       |
| 34 |                                                           |     | questionnaires, laboratory tests) along with their reliability and |       |
| 35 |                                                           |     | validity, if known. Reference to where data collection forms       |       |
| 36 |                                                           |     | can be found, if not in the protocol                               |       |
| 37 |                                                           |     |                                                                    |       |
| 38 |                                                           |     |                                                                    |       |
| 39 |                                                           | 18b | Plans to promote participant retention and complete follow-up,     | N/A   |
| 40 |                                                           |     | including list of any outcome data to be collected for             |       |
| 41 |                                                           |     | participants who discontinue or deviate from intervention          |       |
| 42 |                                                           |     | protocols                                                          |       |
| 43 |                                                           |     |                                                                    |       |
| 44 |                                                           |     |                                                                    |       |
| 45 | Data                                                      | 19  | Plans for data entry, coding, security, and storage, including     | 16-18 |
| 46 | management                                                |     | any related processes to promote data quality (eg, double data     |       |
| 47 |                                                           |     | entry; range checks for data values). Reference to where           |       |
| 48 |                                                           |     | details of data management procedures can be found, if not in      |       |
| 49 |                                                           |     | the protocol                                                       |       |
| 50 |                                                           |     |                                                                    |       |
| 51 |                                                           |     |                                                                    |       |
| 52 | Statistical                                               | 20a | Statistical methods for analysing primary and secondary            | 18-19 |
| 53 | methods                                                   |     | outcomes. Reference to where other details of the statistical      |       |
| 54 |                                                           |     | analysis plan can be found, if not in the protocol                 |       |
| 55 |                                                           |     |                                                                    |       |
| 56 |                                                           | 20b | Methods for any additional analyses (eg, subgroup and              | N/A   |
| 57 |                                                           |     | adjusted analyses)                                                 |       |
| 58 |                                                           |     |                                                                    |       |
| 59 |                                                           |     |                                                                    |       |
| 60 |                                                           |     |                                                                    |       |

|                                 |     |                                                                                                                                                                                                                                                                                                                                       |                 |
|---------------------------------|-----|---------------------------------------------------------------------------------------------------------------------------------------------------------------------------------------------------------------------------------------------------------------------------------------------------------------------------------------|-----------------|
|                                 | 20c | Definition of analysis population relating to protocol non-adherence (eg, as randomised analysis), and any statistical methods to handle missing data (eg, multiple imputation)                                                                                                                                                       | N/A             |
| <b>Methods: Monitoring</b>      |     |                                                                                                                                                                                                                                                                                                                                       |                 |
| Data monitoring                 | 21a | Composition of data monitoring committee (DMC); summary of its role and reporting structure; statement of whether it is independent from the sponsor and competing interests; and reference to where further details about its charter can be found, if not in the protocol. Alternatively, an explanation of why a DMC is not needed | N/A             |
|                                 | 21b | Description of any interim analyses and stopping guidelines, including who will have access to these interim results and make the final decision to terminate the trial                                                                                                                                                               | N/A             |
| Harms                           | 22  | Plans for collecting, assessing, reporting, and managing solicited and spontaneously reported adverse events and other unintended effects of trial interventions or trial conduct                                                                                                                                                     | Ethics protocol |
| Auditing                        | 23  | Frequency and procedures for auditing trial conduct, if any, and whether the process will be independent from investigators and the sponsor                                                                                                                                                                                           | N/A             |
| <b>Ethics and dissemination</b> |     |                                                                                                                                                                                                                                                                                                                                       |                 |
| Research ethics approval        | 24  | Plans for seeking research ethics committee/institutional review board (REC/IRB) approval                                                                                                                                                                                                                                             | 22              |
| Protocol amendments             | 25  | Plans for communicating important protocol modifications (eg, changes to eligibility criteria, outcomes, analyses) to relevant parties (eg, investigators, REC/IRBs, trial participants, trial registries, journals, regulators)                                                                                                      | 22              |
| Consent or assent               | 26a | Who will obtain informed consent or assent from potential trial participants or authorised surrogates, and how (see Item 32)                                                                                                                                                                                                          | 13, 22          |
|                                 | 26b | Additional consent provisions for collection and use of participant data and biological specimens in ancillary studies, if applicable                                                                                                                                                                                                 | N/A             |
| Confidentiality                 | 27  | How personal information about potential and enrolled participants will be collected, shared, and maintained in order to protect confidentiality before, during, and after the trial                                                                                                                                                  | 22              |
| Declaration of interests        | 28  | Financial and other competing interests for principal investigators for the overall trial and each study site                                                                                                                                                                                                                         | 22              |
| Access to data                  | 29  | Statement of who will have access to the final trial dataset, and disclosure of contractual agreements that limit such access for investigators                                                                                                                                                                                       | 22              |

|    |                   |     |                                                                      |                 |
|----|-------------------|-----|----------------------------------------------------------------------|-----------------|
| 1  |                   |     |                                                                      |                 |
| 2  | Ancillary and     | 30  | Provisions, if any, for ancillary and post-trial care, and for       | Ethics protocol |
| 3  | post-trial care   |     | compensation to those who suffer harm from trial participation       |                 |
| 4  |                   |     |                                                                      |                 |
| 5  | Dissemination     | 31a | Plans for investigators and sponsor to communicate trial             | Ethics protocol |
| 6  | policy            |     | results to participants, healthcare professionals, the public,       |                 |
| 7  |                   |     | and other relevant groups (eg, via publication, reporting in         |                 |
| 8  |                   |     | results databases, or other data sharing arrangements),              |                 |
| 9  |                   |     | including any publication restrictions                               |                 |
| 10 |                   |     |                                                                      |                 |
| 11 |                   | 31b | Authorship eligibility guidelines and any intended use of            | N/A             |
| 12 |                   |     | professional writers                                                 |                 |
| 13 |                   |     |                                                                      |                 |
| 14 |                   |     |                                                                      |                 |
| 15 |                   | 31c | Plans, if any, for granting public access to the full protocol,      | N/A             |
| 16 |                   |     | participant-level dataset, and statistical code                      |                 |
| 17 |                   |     |                                                                      |                 |
| 18 |                   |     |                                                                      |                 |
| 19 | <b>Appendices</b> |     |                                                                      |                 |
| 20 |                   |     |                                                                      |                 |
| 21 | Informed consent  | 32  | Model consent form and other related documentation given to          | Ethics protocol |
| 22 | materials         |     | participants and authorised surrogates                               |                 |
| 23 |                   |     |                                                                      |                 |
| 24 | Biological        | 33  | Plans for collection, laboratory evaluation, and storage of          | N/A             |
| 25 | specimens         |     | biological specimens for genetic or molecular analysis in the        |                 |
| 26 |                   |     | current trial and for future use in ancillary studies, if applicable |                 |
| 27 |                   |     |                                                                      |                 |

\*It is strongly recommended that this checklist be read in conjunction with the SPIRIT 2013 Explanation & Elaboration for important clarification on the items. Amendments to the protocol should be tracked and dated. The SPIRIT checklist is copyrighted by the SPIRIT Group under the Creative Commons "[Attribution-NonCommercial-NoDerivs 3.0 Unported](https://creativecommons.org/licenses/by-nc-nd/3.0/)" license.



# BMJ Open

## IMPLEMENTATION OF CONSENSUS-BASED PERIOPERATIVE CARE PATHWAYS TO REDUCE CLINICAL VARIATION FOR ELECTIVE SURGERY IN AN AUSTRALIAN PRIVATE HOSPITAL: A MIXED METHODS PRE-POST STUDY PROTOCOL

|                               |                                                                                                                                                                                                                                                                                                                                                                                                                                                                                                                                                                                                                                                                                                                                                                                                                                                                                                                                                                                                                                                                                                                                                                                                                                                                                                                                                                                                                                                                                                                                                                                                                                                                                                                                                                                                                                                                                                                                                                                                                                                                                                                                                                                                                                                                                                                                                                                                                                                           |
|-------------------------------|-----------------------------------------------------------------------------------------------------------------------------------------------------------------------------------------------------------------------------------------------------------------------------------------------------------------------------------------------------------------------------------------------------------------------------------------------------------------------------------------------------------------------------------------------------------------------------------------------------------------------------------------------------------------------------------------------------------------------------------------------------------------------------------------------------------------------------------------------------------------------------------------------------------------------------------------------------------------------------------------------------------------------------------------------------------------------------------------------------------------------------------------------------------------------------------------------------------------------------------------------------------------------------------------------------------------------------------------------------------------------------------------------------------------------------------------------------------------------------------------------------------------------------------------------------------------------------------------------------------------------------------------------------------------------------------------------------------------------------------------------------------------------------------------------------------------------------------------------------------------------------------------------------------------------------------------------------------------------------------------------------------------------------------------------------------------------------------------------------------------------------------------------------------------------------------------------------------------------------------------------------------------------------------------------------------------------------------------------------------------------------------------------------------------------------------------------------------|
| Journal:                      | <i>BMJ Open</i>                                                                                                                                                                                                                                                                                                                                                                                                                                                                                                                                                                                                                                                                                                                                                                                                                                                                                                                                                                                                                                                                                                                                                                                                                                                                                                                                                                                                                                                                                                                                                                                                                                                                                                                                                                                                                                                                                                                                                                                                                                                                                                                                                                                                                                                                                                                                                                                                                                           |
| Manuscript ID                 | bmjopen-2023-075008.R2                                                                                                                                                                                                                                                                                                                                                                                                                                                                                                                                                                                                                                                                                                                                                                                                                                                                                                                                                                                                                                                                                                                                                                                                                                                                                                                                                                                                                                                                                                                                                                                                                                                                                                                                                                                                                                                                                                                                                                                                                                                                                                                                                                                                                                                                                                                                                                                                                                    |
| Article Type:                 | Protocol                                                                                                                                                                                                                                                                                                                                                                                                                                                                                                                                                                                                                                                                                                                                                                                                                                                                                                                                                                                                                                                                                                                                                                                                                                                                                                                                                                                                                                                                                                                                                                                                                                                                                                                                                                                                                                                                                                                                                                                                                                                                                                                                                                                                                                                                                                                                                                                                                                                  |
| Date Submitted by the Author: | 17-Jul-2023                                                                                                                                                                                                                                                                                                                                                                                                                                                                                                                                                                                                                                                                                                                                                                                                                                                                                                                                                                                                                                                                                                                                                                                                                                                                                                                                                                                                                                                                                                                                                                                                                                                                                                                                                                                                                                                                                                                                                                                                                                                                                                                                                                                                                                                                                                                                                                                                                                               |
| Complete List of Authors:     | <p>Pagano, Lisa; Macquarie University Faculty of Medicine Health and Human Sciences, Australian Institute of Health Innovation<br/> Hemmert, Cameron; The University of Sydney Faculty of Medicine and Health, School of Health Sciences<br/> Hirschhorn, Andrew; Macquarie University Faculty of Medicine Health and Human Sciences, MQ Health<br/> Francis-Auton, Emilie; Macquarie University Faculty of Medicine Health and Human Sciences, Australian Institute of Health Innovation<br/> Arnolda, Gaston; Macquarie University Faculty of Medicine Health and Human Sciences, Australian Institute of Health Innovation<br/> Long, Janet; Macquarie University Faculty of Medicine Health and Human Sciences, Australian Institute of Health Innovation<br/> Braithwaite, Jeffrey; Macquarie University Faculty of Medicine Health and Human Sciences, Australian Institute of Health Innovation<br/> Gumley, Graham; Macquarie University Faculty of Medicine Health and Human Sciences, MQ Health<br/> Hibbert, Peter; Macquarie University Faculty of Medicine Health and Human Sciences, Australian Institute of Health Innovation; University of South Australia Allied Health and Human Performance, IIMPACT in Health<br/> Churruca, Kate; Macquarie University Faculty of Medicine Health and Human Sciences, Australian Institute of Health Innovation<br/> Hutchinson, Karen; Macquarie University Faculty of Medicine Health and Human Sciences, Australian Institute of Health Innovation<br/> Partington, Andrew; Flinders University, Flinders Health and Medical Research Institute; Macquarie University Faculty of Medicine Health and Human Sciences, Australian Institute of Health Innovation<br/> Hughes, Clifford; Macquarie University Faculty of Medicine Health and Human Sciences, Australian Institute of Health Innovation; Macquarie University Faculty of Medicine Health and Human Sciences, MQ Health<br/> Gillatt, David; Macquarie University Faculty of Medicine Health and Human Sciences, MQ Health<br/> Ellis, Louise A.; Macquarie University Faculty of Medicine Health and Human Sciences, Australian Institute of Health Innovation<br/> Testa, Luke; Macquarie University Faculty of Medicine Health and Human Sciences, Australian Institute of Health Innovation<br/> Patel, Romika; Macquarie University Faculty of Medicine Health and Human Sciences, Australian Institute of Health Innovation</p> |

|                                  |                                                                                                                                                                                                                                                        |
|----------------------------------|--------------------------------------------------------------------------------------------------------------------------------------------------------------------------------------------------------------------------------------------------------|
|                                  | Sarkies, Mitchell N; The University of Sydney Faculty of Medicine and Health, School of Health Sciences; Macquarie University Faculty of Medicine Health and Human Sciences, Australian Institute of Health Innovation                                 |
| <b>Primary Subject Heading</b> : | Research methods                                                                                                                                                                                                                                       |
| Secondary Subject Heading:       | Health services research                                                                                                                                                                                                                               |
| Keywords:                        | Adult anaesthesia < ANAESTHETICS, Change management < HEALTH SERVICES ADMINISTRATION & MANAGEMENT, Protocols & guidelines < HEALTH SERVICES ADMINISTRATION & MANAGEMENT, Quality in health care < HEALTH SERVICES ADMINISTRATION & MANAGEMENT, SURGERY |
|                                  |                                                                                                                                                                                                                                                        |

SCHOLARONE™  
Manuscripts

1  
2  
3 **IMPLEMENTATION OF CONSENSUS-BASED PERIOPERATIVE CARE**  
4  
5 **PATHWAYS TO REDUCE CLINICAL VARIATION FOR ELECTIVE SURGERY IN**  
6  
7 **AN AUSTRALIAN PRIVATE HOSPITAL: A MIXED METHODS PRE-POST**  
8  
9 **STUDY PROTOCOL**  
10  
11  
12

13 **AUTHORS:**

14  
15  
16  
17 **Lisa Pagano<sup>1</sup>, Cameron Hemmert<sup>2</sup>, Andrew Hirschhorn<sup>3</sup>, Emilie Francis-Auton<sup>1</sup>,**  
18  
19 **Gaston Arnolda<sup>1</sup>, Janet C Long<sup>1</sup>, Jeffrey Braithwaite<sup>1</sup>, Graham Gumley<sup>3</sup>, Peter D**  
20  
21 **Hibbert<sup>1,4</sup>, Kate Churruca<sup>1</sup>, Karen Hutchinson<sup>1</sup>, Andrew Partington<sup>5,1</sup>, Cliff Hughes<sup>1,3</sup>,**  
22  
23 **David Gillatt<sup>3</sup>, Louise A Ellis<sup>1</sup>, Luke Testa<sup>1</sup>, Romika Patel<sup>1</sup>, Mitchell Sarkies<sup>2,1</sup>**  
24  
25  
26

27 **AFFILIATIONS:**

- 28  
29  
30  
31 1. Australian Institute of Health Innovation, Faculty of Medicine, Health and Human  
32 Sciences, Macquarie University  
33  
34  
35 2. School of Health Sciences, Faculty of Medicine and Health, University of Sydney  
36  
37  
38 3. MQ Health, Faculty of Medicine, Health and Human Sciences, Macquarie University  
39  
40  
41 4. IIMPACT in Health, Allied Health and Human Performance, University of South  
42 Australia  
43  
44  
45 5. Flinders Health and Medical Research Institute, Flinders University  
46  
47

48 **CORRESPONDING AUTHOR:**

49  
50 Lisa Pagano  
51  
52 Australian Institute of Health Innovation  
53  
54 Faculty of Medicine, Health and Human Sciences  
55  
56  
57 Level 6, 75 Talavera Road  
58  
59  
60

1  
2  
3 Macquarie University, NSW 2109, Australia

4  
5 Telephone: +61 (2) 9850 2448

6  
7  
8  
9 Email: lisa.pagano@mq.edu.au

10  
11  
12 **ABSTRACT**

13  
14  
15  
16 **Introduction:** Addressing clinical variation in elective surgery is challenging. A key issue is  
17 how to gain consensus between largely autonomous clinicians. Understanding how the  
18 consensus process works to develop and implement perioperative pathways and the impact of  
19 these pathways on reducing clinical variation can provide important insights into the  
20 effectiveness of the consensus process. The primary objective of this study is to understand  
21 the implementation of an organisationally supported, consensus approach to implement  
22 perioperative care pathways in a private healthcare facility and to determine its impact.  
23  
24  
25  
26  
27  
28  
29  
30  
31

32  
33 **Methods:** A mixed-methods Effectiveness-Implementation Hybrid (Type III) pre-post study  
34 will be conducted in one Australian private hospital. Five new consensus-based perioperative  
35 care pathways will be developed and implemented for specific patient cohorts: spinal surgery,  
36 radical prostatectomy, cardiac surgery, bariatric surgery and total hip and knee replacement.  
37  
38 The individual components of these pathways will be confirmed as part of a consensus-  
39 building approach and will follow a four-stage implementation process using the Exploration,  
40 Preparation, Implementation, and Sustainment (EPIS) framework. The process of  
41 implementation, as well as barriers and facilitators, will be evaluated through semi-structured  
42 interviews and focus groups with key clinical and non-clinical staff, and participant  
43 observation. We anticipate completing 30 interviews and 15-20 meeting observations.  
44  
45 Administrative and clinical end-points for at least 152 participants will be analysed to assess  
46 the effectiveness of the pathways.  
47  
48  
49  
50  
51  
52  
53  
54  
55  
56  
57  
58  
59  
60

1  
2  
3  
4  
5  
6  
7 **Ethics and dissemination:** This study received ethical approval from Macquarie University  
8  
9 Human Research Ethics Medical Sciences Committee (Reference No: 520221219542374).

10  
11 The findings of this study will be disseminated through peer-reviewed publications,  
12  
13 conference presentations, and reports for key stakeholders.  
14  
15

16  
17 **Keywords:** Implementation Science, Clinical variation, Perioperative pathways, Consensus,  
18  
19 Elective surgery, Private providers  
20  
21

### 22 23 **Strengths and Limitations:**

- 24  
25  
26 • The pragmatic nature of the study will deliberately make use of existing practice  
27  
28 structures and approaches to implement the consensus pathways and to obtain patient-  
29  
30 related outcomes.  
31  
32
- 33  
34 • Multiple forms of qualitative data collection will be used to ensure rigour and a  
35  
36 diverse range of perspectives will be gathered.  
37
- 38  
39 • An understanding of the barriers and facilitators to adopting new standardised  
40  
41 processes of care will be obtained which will provide a deeper understanding of the  
42  
43 experiences of implementation at different time periods across multiple surgical  
44  
45 cohorts.  
46
- 47  
48 • Due to the pragmatic nature of the study, pre-post comparison of some clinical  
49  
50 outcomes will be limited to a smaller sample size from one surgical cohort only.  
51  
52  
53  
54  
55  
56  
57  
58  
59  
60

## INTRODUCTION

Addressing clinical variation is a fundamental component of health system improvement.

Whilst in some circumstances variation can be beneficial (e.g., when it represents innovation, or responses to individual patient need or preference), variation in healthcare processes that are unrelated to patient needs or those that differ from evidence-informed guidelines can compromise patient care, create inefficiencies, and contribute to health inequality (1, 2). This is a growing problem both in Australia and internationally, where on average, 60% of recommended care according to best practice guidelines is delivered to patients (3, 4, 5, 6, 7).

In addition, 30% of all care provided could be considered “low value” or waste, and 10% results in some form of iatrogenic harm (1, 4, 5). For example, care processes and outcomes for certain surgical patient cohorts have been found to differ substantially between hospitals in both public and private sectors (8). Data from Australia and the United States of America (USA) demonstrate a high degree of variation in length of stay (LOS), rates of transfer to inpatient rehabilitation following hip and knee arthroplasty (9), and specific to private hospitals, higher unplanned stay (>2 hours) in recovery after surgery (8). Considering the increasing number of elective surgeries and associated hospitalisations undertaken in private hospitals in Australia (10) and elsewhere (11, 12, 13), reducing unwarranted clinical variation in these settings is critical to generating higher value care, improving patient outcomes, and reducing healthcare expenditure.

A number of studies have examined ways to reduce unwarranted clinical variation, such as through the implementation of evidence-based perioperative care pathways for surgical cohorts (14, 15, 16). Enhanced recovery after surgery (ERAS) models are one such example involving the implementation of multimodal, evidence-based perioperative pathway designed to achieve early recovery and optimal patient outcomes (17). However, despite many studies

1  
2  
3 demonstrating the efficacy of some strategies in reducing variation, the optimal methods of  
4 developing and implementing such strategies into complex healthcare systems remain  
5 unclear. More evidence is needed on how best to implement and sustain these changes, as  
6 well as the barriers and facilitators to different methods of implementation to reduce  
7 unwarranted variation.  
8  
9

10  
11  
12  
13  
14  
15 Evidence-informed perioperative care pathways designed to standardise the management of  
16 surgical patients to the best evidence-informed practice have been shown to reduce variation  
17 and improve patient outcomes (18). Perioperative care refers to the care of patients before,  
18 during, and after surgical procedures involving anaesthesia (19). Care leading up to a surgical  
19 procedure involves the reduction of modifiable risks, often in a preoperative clinic, through  
20 patient education, medication optimisation, and other prophylactic treatments. After surgery,  
21 the focus is on expediting recovery and minimising the risk of complications by optimising  
22 such things as pain relief, antibiotic regimens to reduce infection risks, anticoagulation  
23 protocols to avoid blood clotting, and early mobility to return to normal function. Private  
24 hospitals in most countries have historically relied on accredited medical practitioners to  
25 individually develop their own perioperative care protocols using a combination of their  
26 experience, past practice, and clinical practice guidelines (20). Such protocols, when  
27 implemented as frontline care, can create variation in care delivery based on provider  
28 preferences.  
29  
30  
31  
32  
33  
34  
35  
36  
37  
38  
39  
40  
41  
42  
43  
44  
45  
46  
47

48 Implementing changes to patient care is complex and challenging, requiring concerted efforts  
49 over time. This challenge is well documented and usually involves the provision of resources  
50 to support change efforts, shifting professional roles, and altering cultural norms (21, 22).

51  
52  
53 Rather than a “one size fits all” approach, pathways need to be developed to suit the  
54 particular needs of the patient cohort and surgical discipline, as well as local resources  
55 available. However, there is no universal approach to implementing these pathways. In many  
56  
57  
58  
59  
60

1  
2  
3 private hospitals, medical practitioners tend to operate with a high degree of professional  
4  
5 autonomy, which necessitates a consensus-building approach between providers for any  
6  
7 standardisation of care processes.  
8  
9

## 10 11 **Objectives**

12  
13  
14 The primary objective of this study is to determine successful processes to implementing  
15  
16 perioperative care pathways in a private hospital setting using an organisationally supported  
17  
18 consensus approach for surgical cohorts, including: i) spinal surgery; ii) radical  
19  
20 prostatectomy; iii) cardiac surgery; iv) bariatric surgery and; v) hip and knee replacement  
21  
22 surgery. The secondary objective is to assess the impact on administrative and, where  
23  
24 possible, clinical and patient-reported outcomes. We hypothesise that a consensus-based  
25  
26 approach to care pathway development and implementation will lead to high levels of fidelity  
27  
28 to best practice perioperative care processes and improve patient outcomes.  
29  
30  
31  
32  
33

## 34 35 **METHODS**

### 36 37 38 **Study design**

39  
40  
41 This protocol follows the 'SPIRIT 2013 Statement: Defining standard protocol items for  
42  
43 clinical trials' guidelines for reporting (see Supplementary File 1). A mixed-methods  
44  
45 Effectiveness-Implementation Hybrid (Type III) pre-post study will be used to evaluate the  
46  
47 implementation of evidence and consensus-based perioperative pathways, prioritising  
48  
49 assessment of effectiveness of the implementation strategies. Whilst improving clinical  
50  
51 outcomes is an important goal of any change process, standardisation of perioperative  
52  
53 pathways has already been demonstrated to confer benefit to clinical outcomes (14, 23, 24,  
54  
55 25, 26). As such, clinical outcomes will be considered secondary in this study. The  
56  
57 perioperative care pathways will be implemented once consensus has been reached and  
58  
59  
60



1  
2  
3 outcomes will be compared to those observed before pathway development and integration  
4  
5 into routine care, as a control period.  
6  
7

## 8 9 **Study Setting**

10  
11  
12 The study will be conducted over a two-year period from October 2022 to December 2024 at  
13  
14 Macquarie University Hospital (MUH). MUH is located in Sydney, Australia and is a  
15  
16 university-owned, private teaching hospital that focusses on clinical care, teaching and  
17  
18 research. MUH comprises 144 beds, 16 operating theatres, and is staffed by over 200  
19  
20 surgeons and other health professionals.  
21  
22

## 23 24 25 **Eligibility criteria**

26  
27  
28 Hospital staff and patients will be considered as study participants for the surgical cohorts:  
29  
30 spinal surgery, radical prostatectomy, cardiac surgery, bariatric surgery and hip and knee  
31  
32 replacement surgery. Data from hospital staff participants will primarily be used to examine  
33  
34 the implementation of perioperative care pathways. Administrative data and data from  
35  
36 consenting prostatectomy patients will be used firstly, to conduct a process evaluation and  
37  
38 secondly, to evaluate impacts on patient-related outcomes.  
39  
40  
41

42  
43 *Hospital staff:* Local hospital staff involved in the delivery of clinical care or development  
44  
45 and implementation of care pathways (i.e., both clinicians and non-clinical staff) will be  
46  
47 considered eligible to participate in the implementation component of this study.  
48  
49

50  
51 *Patients:* Those admitted during the relevant study periods, seeking care for any of the  
52  
53 clinical cohorts of interest will be considered eligible for this study.  
54  
55

56  
57 There are no specific exclusion criteria for this study.  
58  
59  
60

## Intervention

Development and implementation of the cohort-specific standardised perioperative pathways will follow a six-step process nested within four implementation stages using the Exploration, Preparation, Implementation, and Sustainment (EPIS) framework (27). The EPIS Framework guides projects through key stages of the implementation process and highlights important factors influencing implementation success within the broader “outer context” (system) and the proximal “inner context” (organisation) across each EPIS stage. The proposed implementation strategies are summarised in Table 1. The general implementation strategies will be tailored to each new patient cohort utilising a consensus-building approach. Our implementation science approach will examine this consensus-building process to support successful implementation of the pathways.

### *Stage 1: Exploration*

The exploration stage will aim to understand the existing and emerging needs of both clinicians and patients, and to identify the optimal modifications and supports required for the implementation strategy to address those needs. This could include modifications to existing information technology (IT) processes or the introduction of organisational support and educational resources for staff members to implement the pathways. To achieve this objective, a care pathway implementation support team will be established comprising members of the research team and key hospital stakeholders. Stakeholders will include a coalition of both clinical partners, such as clinical education coordinators, and non-clinical partners, such as hospital administrators, to ensure a wide breadth of expertise are included. The primary goal for the team will be to act as a vehicle for organisational leadership that builds capacity in clinical improvement and implementation science methodology. Individual roles within the team will be clarified across the project to reduce the risk of any duplicative

1  
2  
3 efforts and improve the visibility of activities across different patient cohorts where pathways  
4 will be implemented. The team will meet monthly for the duration of the study to discuss  
5  
6 goals and action items relating to the project to facilitate implementation of the perioperative  
7  
8 pathways. For example, an important aim for the support team will be to reduce the time-  
9  
10 burden for clinicians during pathway implementation and to establish actions that will  
11  
12 minimise potential time pressures.  
13  
14  
15

### 16 17 18 *Stage 2: Preparation* 19

20  
21 The objective of the preparation stage is to use a consensus-building approach to develop and  
22  
23 standardise perioperative care pathways for each surgical cohort, and to use learnings from  
24  
25 the hip and knee replacement surgery cohorts retrospectively to facilitate successful  
26  
27 implementation. During this stage, perioperative pathways will be drafted by a clinician-  
28  
29 researcher in a hospital leadership position (AH) and senior management staff, based on a  
30  
31 combination of 'current' surgeon clinical guidelines and evidence-based practice. Clinical  
32  
33 consensus groups will then be established for each cohort by the clinician-researcher. These  
34  
35 groups will include multidisciplinary representation such as surgeons, anaesthetists, nursing  
36  
37 and allied health, and will be led by the discipline heads. Clinical consensus groups will  
38  
39 attend regular meetings facilitated by the clinician-researcher to discuss components of care  
40  
41 to be included in the standardised perioperative pathways, including acceptable bounds of  
42  
43 variation in practice. The pathways will optimise components of care differently across  
44  
45 cohorts based on current evidence and joint medical decision making, including, but not  
46  
47 limited to, preoperative optimisation, postoperative analgesia, surgical antibiotic prophylaxis,  
48  
49 anticoagulation protocols and mobilisation after surgery. An 'informal' approach will be  
50  
51 utilised to achieve consensus on the perioperative pathways whereby a set of pre-defined  
52  
53 components will be discussed at each meeting and agreed upon by group members using both  
54  
55  
56  
57  
58  
59  
60

1  
2  
3 evidence and their own perspectives to inform discussion (28). Items will be documented by  
4 the facilitator and relevant documentation will be sent to each group member for further  
5 review as required following each meeting. Following this process, pathways will be  
6 circulated by each group member to their individual teams for feedback and critical  
7 modifications will then be made by the consensus groups at additional meetings which will  
8 facilitate implementation during the next two stages.  
9  
10  
11  
12  
13  
14  
15  
16  
17

18 An additional goal of this phase will be to establish consensus from both the taskforce and  
19 clinical consensus groups on a plan to implement the pathways. A draft implementation plan  
20 will be created by the task force. This plan will be reviewed by the clinical consensus groups  
21 for modifications as required and each member will serve as “champions” to drive  
22 implementation. Components of the implementation plan may include education and training  
23 sessions for nursing and allied health and establishing audit and feedback processes on the  
24 wards.  
25  
26  
27  
28  
29  
30  
31  
32  
33  
34

35 A separate stakeholder engagement group will be formed to represent the views of patient  
36 representatives, engage frontline clinical staff in implementation, and facilitate rapid  
37 feedback regarding implementation challenges to the care pathway implementation support  
38 team. Researchers involved in qualitative data collection will observe this process through  
39 naturalistic observation however, they will not have a role in determining components of the  
40 pathways. During this stage, learnings obtained from implementation of pathways for the hip  
41 and knee replacement cohort will also be analysed by the research team to further understand  
42 the process of implementation using a consensus approach.  
43  
44  
45  
46  
47  
48  
49  
50  
51  
52  
53  
54

### 55 *Stage 3: Implementation*

56  
57  
58  
59  
60

1  
2  
3 In the implementation stage, installation of the care pathways will be guided by the planned  
4 implementation supports formalised in the preparation phase. It will be critical to monitor the  
5 implementation process during this stage and adjust supports accordingly. Care pathway  
6 toolkits including education and documentation resources will be finalised and disseminated  
7 to clinical staff and patients at this stage to foster prompt widespread practice change. Further  
8 monitoring of the degree of engagement and cohesion between clinical leadership and  
9 frontline clinical staff will be achieved using participant observations. Particular attention  
10 will be paid to the capacity of frontline clinical staff to absorb and apply new care pathways,  
11 avoiding “bottlenecks” between care pathway development and implementation. This stage  
12 will also be supported by an iterative audit and feedback process and data analytics to  
13 identify gains made and update external benchmarking comparisons over time. Audit and  
14 feedback will relate to process (implementation) outcomes, health services outputs, and  
15 patient-level outcomes and this feedback will be communicated with staff at regular  
16 discipline meetings.

#### 36 *Stage 4: Sustainment*

37  
38  
39  
40 The sustainment stage involves the continued application of the structures and processes of  
41 the care pathways to realise tangible improvements in patient outcomes. At this stage, care  
42 variation reduction becomes a standing item on regular Patient Safety and Quality Committee  
43 meeting agendas. “Roadshow” presentations to the stakeholder engagement groups, frontline  
44 clinical staff and hospital leadership groups can continue bi-directional communication and  
45 feedback loops to identify new areas of care variance prioritised for future care pathways. We  
46 also plan to translate our findings via policy maker round tables and engagement and training  
47 with other private hospitals.

**Table 1** Overview of implementation strategies

| Implementation stage  | Implementation strategy                        | Description                                                                                                                                                                                                              |
|-----------------------|------------------------------------------------|--------------------------------------------------------------------------------------------------------------------------------------------------------------------------------------------------------------------------|
| <i>Exploration</i>    | Build a coalition                              | Recruit and cultivate relationships with partners in the implementation effort by formally establishing a care pathway support team                                                                                      |
| <i>Preparation</i>    | Conduct local consensus discussions            | Establish a structure for local providers and other stakeholders to form cohort-specific clinical consensus groups to discuss the processes of care and standardisation of pathways                                      |
|                       | Co-develop a formal implementation blueprint   | Co-develop a formal blueprint for iterative care pathway prioritisation and implementation                                                                                                                               |
| <i>Implementation</i> | Develop and implement care pathway toolkits    | Develop, test, and introduce quality improvement tools and educational materials                                                                                                                                         |
|                       | Audit and provide feedback                     | Embed a comprehensive system audit around care variation, clinical and process outcomes over specified time periods and disseminate to clinicians and administrators to monitor, evaluate, and modify provider behaviour |
| <i>Sustainment</i>    | Facilitate relay of clinical data to providers | Undertake formal monitoring and evaluation and develop a reporting structure and channels of communication for care pathway development, implementation, and outcomes                                                    |

## Recruitment

### *Semi-structured interviews and focus groups with hospital staff*

A purposive sample of staff who have been previously involved in the development of perioperative pathways or provision of care for the hip and knee replacement surgical cohorts, and staff currently involved in the development and implementation of the new pathways for the four new surgical cohorts will be recruited. Staff will be identified by MUH

1  
2  
3 co-investigators. Research staff not employed by MUH will approach the identified staff  
4  
5 members either by email invitation or face-to-face to request their participation in the  
6  
7 interviews, indicating that they have been identified by the research team as a key stakeholder  
8  
9 in the development and implementation of the pathways. This approach is designed to avoid  
10  
11 the potential impact of any existing relationships between hospital staff and co-investigators.  
12  
13 A brief explanation of the study and a written participant information form will be provided  
14  
15 to the staff members. Staff members will be provided with time to review the information and  
16  
17 ask any questions of the research staff prior to their decision to consent to participate in the  
18  
19 interviews and focus groups, or not.  
20  
21  
22  
23  
24

#### 25 *Participant observations with hospital staff*

26  
27 Staff attending relevant meetings will be recruited, such as planned support team project  
28  
29 meetings, clinical consensus group meetings, stakeholder engagement group meetings,  
30  
31 patient safety and quality committees, and ward based clinical meetings. Attendance of these  
32  
33 meetings by external staff will be through invitation from hospital co-investigators. Study  
34  
35 information and a participant information form will be provided prior to the initial meeting  
36  
37 where participant observations will take place.  
38  
39  
40  
41

## 42 **OUTCOMES**

### 43 **Primary outcomes**

44  
45  
46 A summary of the primary outcome measures for this study can be found in Table 2.  
47  
48 Implementation outcomes including acceptability, appropriateness, feasibility, adoption,  
49  
50 fidelity and sustainment, and penetration, will be used to understand the impact of the  
51  
52 implementation strategies and implementation using a consensus-building approach on  
53  
54 secondary outcomes (29).  
55  
56  
57  
58  
59  
60

**Table 2** Summary of primary outcome measures

|                                        |                                                                                                                                                                                                                                                             |
|----------------------------------------|-------------------------------------------------------------------------------------------------------------------------------------------------------------------------------------------------------------------------------------------------------------|
| <b><i>Acceptability</i></b>            | Provider knowledge and satisfaction with aspects of the perioperative pathways and their implementation will be collected via qualitative interviews and participant observation                                                                            |
| <b><i>Appropriateness</i></b>          | Appropriateness will be assessed both retrospectively based on the experiences piloting the intervention for the hip and knee replacement cohorts using qualitative interviews, as well as for the four prospective cohorts using participant observation   |
| <b><i>Feasibility</i></b>              | Feasibility will be measured both retrospectively using pilot data from the hip and knee replacement cohorts and prospectively for the four new cohorts of interest using interviews and participant observation                                            |
| <b><i>Adoption</i></b>                 | Participant observations of the clinical consensus-building process will be used to measure the reasons pertaining to the intention, initial decision, or action to integrate the perioperative care pathways into routine clinical practice                |
| <b><i>Fidelity and sustainment</i></b> | Regular audits of adherence to the care pathways will provide an indication of variations to practice over time, including potential modifications and tailoring of the pathways by frontline staff (e.g., nurses) to better fit within their work routines |



|                           |                                                                                                                                      |
|---------------------------|--------------------------------------------------------------------------------------------------------------------------------------|
| <b><i>Penetration</i></b> | Penetration will be assessed by the number of eligible patients who receive the care pathway as intended according to planned audits |
|---------------------------|--------------------------------------------------------------------------------------------------------------------------------------|

## Secondary outcomes

Secondary outcomes assessed will include both process outcomes and clinical outcomes:

- Hospital or intensive care unit LOS for each cohort will be collected from routine administrative data systems.
- Patient-reported experience measures (PREMs) collected via patient surveys.
- Patient-reported outcome measures (PROMs) collected via patient surveys e.g., health-related quality of life questionnaires.
- Discharge destination collected from routine administrative data systems.
- Hospital-acquired complication rates collected from routine incident reporting systems.
- Hospital readmission rates collected from routine administrative data systems.

Selected PREMs and PROMs for the prostatectomy cohort are currently routinely collected at some site hospitals by specialist nurse practitioners and recorded in the patient's medical records. These include the Prostate Cancer Distress Screen (30), the International Prostate Symptom Score (IPSS) (31), Incontinence Questionnaire-Urinary Incontinence Short Form (32) and the Sexual Health Inventory for Men (33). Research staff will assist with sending out surveys (see Supplementary File 2), prior to the routine six-month follow up assessment for up to 50-100 patients both before and after pathway implementation where patients consent, standardising an existing clinical interaction for comparison. Specific PROMs and PREMs

1  
2  
3 measures for the remaining pathways will be determined during the consensus building  
4 process and if agreed, these measures will only be collected for research purposes where  
5 patients consent, prospectively.  
6  
7  
8  
9

## 10 **Data collection**

### 11 *Qualitative interviews and focus groups*

12  
13  
14  
15  
16 Semi-structured one-on-one interviews or focus groups will be conducted over a 12-month  
17 period with key clinical and non-clinical hospital staff and patient/consumer representatives,  
18 focussing retrospectively on the pilot hip and knee replacement cohorts and prospectively for  
19 each of the four new cohorts. Interview guides will be piloted prior to data collection and will  
20 include questions pertaining to participants knowledge and experiences of implementing the  
21 standardised perioperative pathways, as well as barriers and facilitators to this process (see  
22 Supplementary File 3 and Supplementary File 4 for planned interview guides). Interviews  
23 and focus groups will be conducted by one experienced qualitative researcher (LP) via  
24 videoconference or face-to-face at participants' preferred time and location, lasting between  
25 30-60 minutes. The researcher will conduct all interviews in a private room suited to the  
26 interviewee, where interviews will be digitally recorded and transcribed verbatim. Field notes  
27 will also be made by the interviewer including initial thoughts, interpretations and analysis of  
28 the data collected. Audio and written data will be immediately saved in a password protected  
29 file on an encrypted password protected computer.  
30  
31  
32  
33  
34  
35  
36  
37  
38  
39  
40  
41  
42  
43  
44  
45  
46  
47  
48  
49

### 50 *Qualitative participant observation*

51  
52 Data collectors will conduct naturalistic participant observations within the planned support  
53 team project meetings, clinical consensus group meetings, stakeholder engagement group  
54 meetings, patient safety and quality committee, and ward-based clinical meetings (34). Each  
55 observation session is anticipated to last between one to two hours. Fieldnotes will be taken  
56  
57  
58  
59  
60

1  
2  
3 to spatially contextualise events within the study aims (35). These observations will not be  
4  
5 guided by a pre-determined schedule, but rather, they will inductively evolve in real-world  
6  
7 practice environments. This includes how staff converse with one another, how they plan and  
8  
9 make decisions together about perioperative care (i.e., implementation, communication  
10  
11 pathways, leadership), and how decision-making processes evolve and take shape across  
12  
13 different meetings with different stakeholders.  
14  
15

### 16 17 18 *Quantitative clinical outcomes data* 19

20  
21 Data on clinical outcomes will be collected from administrative databases. These data include  
22  
23 measures such as hospital LOS, discharge destination, acquired complications, and  
24  
25 readmission. Data from routine administrative databases has high levels of agreement with  
26  
27 the medical record for both length of stay (93%) and discharge destination (91%) data, but  
28  
29 some limitations are acknowledged when capturing acquired complications (36, 37). Those  
30  
31 data not routinely collected within existing administrative databases will be collected  
32  
33 prospectively or via retrospective electronic medical review.  
34  
35  
36  
37

### 38 39 **Sample size** 40

41  
42 Qualitative data pertaining to the implementation of the perioperative clinical pathways will  
43  
44 use the concept of theoretical saturation to determine the observation and interview sample  
45  
46 size (38). Based on prior studies, we anticipate conducting 30 interviews and 15-20 meeting  
47  
48 observations (39, 40). Staff will be recruited using convenience time-frame sampling which  
49  
50 removes opportunistic recruitment of staff and patients, and any researcher or hospital  
51  
52 selection bias.  
53  
54

55  
56  
57 For quantitative data, a power calculation was undertaken for each of the four cohorts based  
58  
59 on the mean and standard deviation of LOS for each at a site hospital in the 2020 and 2021  
60

1  
2  
3 financial years, an estimated important reduction in LOS, two sided  $\alpha=0.05$  and 80% power.  
4  
5 For spinal surgery, for example, reduction of mean LOS from 4.28 (SD: 4.66) to 2.78 (the  
6  
7 peer group average) required 152 patients pre- and post-intervention, which is achievable  
8  
9 with twelve months' follow-up. Bariatric surgery, on the other hand, requires only 6 months.  
10  
11 Overall, MUH LOS for cardiac surgery is in line with its peer group, so for this cohort the  
12  
13 target is intensive unit LOS, which is higher than that of peers. The cohorts requiring longer  
14  
15 follow-up periods will be prioritised for earlier intervention where feasible. It is important to  
16  
17 note that the research team does not view LOS as the most important clinical outcome for  
18  
19 these four cohorts; it is used for sample size estimation because it is an administrative  
20  
21 outcome where there is a prospect of measuring relevant quantitative change in the time  
22  
23 available to the study. Moreover, relevant data on means and standard deviations is routinely  
24  
25 available, permitting sample size calculation.  
26  
27  
28  
29  
30

## 31 32 **DATA ANALYSIS**

### 33 34 35 **Qualitative**

#### 36 37 38 *Qualitative interview and observation analysis*

39  
40  
41  
42 Fieldnotes and interview transcripts will be imported into Nvivo20 for data management.

43  
44 Data will be analysed thematically (41, 42) by two experienced qualitative analysts (primary  
45  
46 and secondary) (LP and MS or EFA) working together to ensure the process is rigorous, and  
47  
48 to enable them to discuss the major and minor themes arising inductively and their  
49  
50 concomitant categories until consensus agreement can be achieved. The secondary analyst  
51  
52 will examine a subset of the complete dataset, to ensure methodological veracity during the  
53  
54 analytic process.  
55  
56  
57  
58

### 59 60 **Quantitative**

### *Quantitative analysis of clinical endpoints*

Data will be analysed by three researchers (LP, GA and MNS) using SPSS. Descriptive statistics will be used to summarise demographic data. For LOS, historical data will be sourced from administrative databases to identify any secular trend and take this into account in attributing any pre-post change to intervention. For other clinical outcomes, PREMs and PROMs will be descriptive only and restricted to 50-100 patients from the prostatectomy cohort and any other cohort where these outcomes are available, while hospital acquired complications and hospital readmission rates will be compared pre- and post-intervention. The estimated between-group difference and the 95% confidence intervals (95% CI) will be reported and for significant testing, p values <0.05 will be considered statistically significant.

### **Patient and Public Involvement**

Input and feedback was obtained from the site hospital's Clinical Leadership Committee and the Clinical Disciplines on aspects of the study design, such as the planned implementation strategies and outcome measures. Patients were not involved in the design of this study, however, patient consumer input and feedback will be sought from the site hospital's consumer advisory committee where resources for patients are developed.

### **Ethics and dissemination:**

Approval to conduct this study has been obtained from the Macquarie University Human Research Ethics Medical Sciences Committee (Reference No: 520221219542374). Research governance authorisation has been provided by the MQ Health Clinical Research Executive. A waiver for consent will be sought from participants for data obtained in this study. PROMs/PREMs data being collected for clinical purposes will seek informed patient consent for de-identified data to be used for research purposes. The findings of this study will be

1  
2  
3 disseminated through peer-reviewed publications, conference presentations, and summaries  
4  
5 or reports for key stakeholders and partners in the field.  
6  
7

8  
9 **Word count:** 3571 words  
10

11  
12 **List of Abbreviations:**  
13

14 EPIS Exploration, Preparation, Implementation, and Sustainment Framework;  
15

16  
17  
18 ERAS Enhanced Recovery After Surgery;  
19

20  
21  
22 IT Information Technology;  
23

24  
25  
26 LOS Length of stay;  
27

28  
29  
30 MUH Macquarie University Hospital;  
31

32  
33  
34 PREMs Patient-reported experience measures;  
35

36  
37  
38 PROMs Patient-reported outcome measures;  
39

40  
41  
42 SD Standard deviation  
43

44  
45  
46 USA United States of America  
47

48  
49 **DECLARATIONS:**  
50

51  
52 **Protocol amendments:**  
53

54  
55 Approval from the study investigators, Human Research Ethics Committee, and research  
56  
57 governance will be sought for any protocol amendments. Amendments will be reported in the  
58  
59 published manuscript as a deviation from the protocol.  
60

**Consent for publication:**

Not applicable.

**Availability of data and materials:**

Data sharing is not applicable to this article as no datasets were generated or analysed during the current study.

**Competing interests:**

The authors declare that they have no competing interests.

**Funding:**

This project was funded from the Translational Research Grant Program from the HCF Research Foundation (CIA Sarkies - project ref 52854/00 201640932). The funders were not involved in the design or conduct of the study. The content is solely the responsibility of the authors and does not necessarily represent the official view of the HCF Research Foundation. JB reports funding from multiple sources including the National Health and Medical Research Council: 9100002 and GNT1176620.

**Authors' contributions:**

The study was conceived by MS, AH, EF-A, GA, JCL, JB, GG, PDH, KC, KH, AP, CH, DG, LAE, LT, and RP and all authors contributed to the study design. LP, CH and MS wrote the initial draft of the manuscript. All authors contributed to and approved the final version of the manuscript.

**Acknowledgements:**

1  
2  
3 The authors would like to acknowledge the contributions of Macquarie University Hospital,  
4  
5 the members of the clinical standardisation taskforce and the staff that are assisting with the  
6  
7 project.  
8  
9

10  
11  
12  
13  
14  
15  
16  
17  
18  
19  
20  
21  
22  
23  
24  
25  
26  
27  
28  
29  
30  
31  
32  
33  
34  
35  
36  
37  
38  
39  
40  
41  
42  
43  
44  
45  
46  
47  
48  
49  
50  
51  
52  
53  
54  
55  
56  
57  
58  
59  
60

For peer review only



## REFERENCES

1. Braithwaite J, Glasziou P, Westbrook J. The three numbers you need to know about healthcare: the 60-30-10 Challenge. *BMC Med* 2020;18(1):102.
2. Australian Commission on Safety and Quality in Health Care and Australian Institute of Health and Welfare. *Exploring Healthcare Variation in Australia: Analyses Resulting from an OECD Study*. Sydney: ACSQHC; 2014.
3. Braithwaite J, Hibbert PD, Jaffe A, et al. Quality of Health Care for Children in Australia, 2012-2013. *JAMA* 2018;319(11):1113-24.
4. McGlynn EA, Asch SM, Adams J, et al. The quality of health care delivered to adults in the United States. *N Engl J Med* 2003;348(26):2635-45.
5. Mangione-Smith R, DeCristofaro AH, Setodji CM, et al. The quality of ambulatory care delivered to children in the United States. *N Engl J Med* 2007;357(15):1515-23.
6. Runciman WB, Hunt TD, Hannaford NA, et al. CareTrack: assessing the appropriateness of health care delivery in Australia. *Med J Aust* 2012;197(2):100-5.
7. Sarkies MN, Jones LK, Gidding SS, et al. Improving clinical practice guidelines with implementation science. *Nature Reviews Cardiology*. 2022;19(1):3-4.
8. Australian Commission on Safety and Quality in Health Care and Australian Institute of Health and Welfare. *The Fourth Australian Atlas of Healthcare Variation*. Sydney: ACSQHC; 2021.
9. Royal Australasian College of Surgeons. *Rehabilitation Pathways Following Hip and Knee Arthroplasty* [Internet]. Adelaide: Royal Australasian College of Surgeons, 2018 [cited 2023 March 1] Available from <https://www.surgeons.org/en/Resources/reports-guidelines-publications/surgical-variance-reports>.

- 1  
2  
3 10. Australian Institute of Health and Welfare. Australia's hospitals at a glance [Internet]  
4  
5 Canberra:Australian Institute of Health and Welfare, 2022 [cited 2023 Jan 31] Available from  
6  
7 <https://www.aihw.gov.au/reports/hospitals/australias-hospitals-at-a-glance/contents/summary>.  
8  
9
- 10  
11 11. Goodair B, Reeves A. Outsourcing health-care services to the private sector and  
12  
13 treatable mortality rates in England, 2013–20: an observational study of NHS privatisation.  
14  
15 *Lancet Public Health* 2022;7(7):e638-e46.
- 16  
17 12. Sá L, Covre ER, Melo WA, et al. Public-private relationship in surgical  
18  
19 hospitalizations through the Unified Health System. *Rev Lat Am Enfermagem*  
20  
21 2021;29:e3467.
- 22  
23 13. Anderson M. Changes in publicly and privately funded care in England following a  
24  
25 national programme to reduce provision of low-value elective surgery. *Br J Surg*  
26  
27 2023;110(2):209-16.
- 28  
29 14. Rotter T, Kinsman L, James EL, Machotta A, Gothe H, Willis J, et al. Clinical  
30  
31 pathways: effects on professional practice, patient outcomes, length of stay and hospital  
32  
33 costs. *Cochrane database of systematic reviews*. 2010(3).
- 34  
35 15. Harrison R, Hinchcliff RA, Manias E, et al. Can feedback approaches reduce  
36  
37 unwarranted clinical variation? A systematic rapid evidence synthesis. *BMC Health Serv Res*  
38  
39 2020;20(1):40
- 40  
41 16. Harrison R, Manias E, Mears S, et al. Addressing unwarranted clinical variation: a  
42  
43 rapid review of current evidence. *J Eval Clin Pract* 2019;25(1):53-65.
- 44  
45 17. ERAS Society [Internet]. Enhanced Recovery After Surgery; 2023 [cited 2023 Jun  
46  
47 2023]. Available from: <https://erassociety.org/>.
- 48  
49 18. Cline KM, Clement V, Rock-Klotz J, Kash BA, Steel C, Miller TR. Improving the  
50  
51 cost, quality, and safety of perioperative care: A systematic review of the literature on  
52  
53 implementation of the perioperative surgical home. *J Clin Anesth*. 2020;63:109760.  
54  
55  
56  
57  
58  
59  
60

- 1  
2  
3 19. McQueen K, Coonan T, Ottaway A, et al. Anesthesia and Perioperative Care. In:  
4  
5 Essential Surgery: Disease Control Priorities: 3<sup>rd</sup> ed. (Volume 1). Washington (DC): The  
6  
7 International Bank for Reconstruction and Development / The World Bank; 2015.  
8  
9
- 10 20. Gabbay JIM, A. Practice-Based Evidence for Healthcare: Clinical Mindlines. 1 ed.  
11  
12 London: Routledge; 2010.  
13
- 14 21. Braithwaite J. Changing how we think about healthcare improvement. BMJ.  
15  
16 2018;361:k2014.  
17
- 18 22. Sarkies M, Robinson S, Ludwick T, et al. Understanding implementation science  
19  
20 from the standpoint of health organisation and management: an interdisciplinary exploration  
21  
22 of selected theories, models and frameworks. J. Health Manag. 2021;35(7):782-801.  
23
- 24 23. Kurtin P, Stucky E. Standardize to excellence: improving the quality and safety of  
25  
26 care with clinical pathways. Pediat Clin North Am 2009;56(4):893-904.  
27
- 28 24. Heymans MJ, Kort NP, Snoeker BA, et al. Impact of enhanced recovery pathways on  
29  
30 safety and efficacy of hip and knee arthroplasty: A systematic review and meta-analysis.  
31  
32 World J Orthop 2022;13(3):307.  
33
- 34 25. Kagedan DJ, Ahmed M, Devitt KS, et al. Enhanced recovery after pancreatic surgery:  
35  
36 a systematic review of the evidence. HPB (Oxford) 2015;17(1):11-6.  
37
- 38 26. Lemmens L, Van Zelm R, Rinkes IB, et al. Clinical and organizational content of  
39  
40 clinical pathways for digestive surgery: a systematic review. Dig Surg 2009;26(2):91-9.  
41
- 42 27. Moullin JC, Dickson KS, Stadnick NA, et al. Systematic review of the Exploration,  
43  
44 Preparation, Implementation, Sustainment (EPIS) framework. Implement Sci 2019;14(1):1  
45
- 46 28. World Health Organization. WHO handbook for guideline development. 2nd ed:  
47  
48 World Health Organization; 2014.  
49  
50  
51  
52  
53  
54  
55  
56  
57  
58  
59  
60

- 1  
2  
3 29. Proctor E, Silmere H, Raghavan R, et al. Outcomes for Implementation Research:  
4 Conceptual Distinctions, Measurement Challenges, and Research Agenda. *Adm Policy Ment*  
5 *Health* 2011;38(2):65-76.  
6  
7  
8  
9  
10 30. Prostate Cancer Foundation of Australia. Screening for Distress [Interent] 2022 [cited  
11 2023 March 3] Available from: [https://www.pcfa.org.au/awareness/for-healthcare-](https://www.pcfa.org.au/awareness/for-healthcare-professionals/screening-for-distress/)  
12 [professionals/screening-for-distress/](https://www.pcfa.org.au/awareness/for-healthcare-professionals/screening-for-distress/).  
13  
14  
15  
16  
17 31. Barry MJ, Fowler Jr FJ, O'Leary MP, et al. The American Urological Association  
18 symptom index for benign prostatic hyperplasia. *J Urol* 1992;148(5):1549-57.  
19  
20  
21 32. Avery K, Donovan J, Peters TJ, et al. ICIQ: a brief and robust measure for evaluating  
22 the symptoms and impact of urinary incontinence. *Neurourol Urodyn* 2004;23(4):322-30.  
23  
24  
25  
26 33. Rosen RC, Cappelleri J, Smith M, et al. Development and evaluation of an abridged,  
27 5-item version of the International Index of Erectile Function (IIEF-5) as a diagnostic tool for  
28 erectile dysfunction. *Int J Impot Res* 1999;11(6):319-26.  
29  
30  
31  
32  
33 34. Rapport F, Auton E, Cartmill J, et al. Fit for purpose? Organisational prOdUctivity  
34 and woRkforce wellbeIng in workSpaces in Hospital (FLOURISH): a multimethod  
35 qualitative study protocol. *BMJ Open* 2019;9(4):e027636.  
36  
37  
38  
39  
40 35. Emerson RM, Fretz RI, Shaw LL. *Writing ethnographic fieldnotes*. 2nd ed. Chicago:  
41 University of Chicago press; 2011.  
42  
43  
44 36. Sarkies MN, Bowles K-A, Skinner E, et al. Data collection methods in health services  
45 research. *Appl Clin Inform* 2015;6(01):96-109.  
46  
47  
48  
49 37. Sarkies MN, Bowles KA, Skinner EH, et al. Do daily ward interviews improve  
50 measurement of hospital quality and safety indicators? A prospective observational study. *J*  
51 *Eval clin Pract* 2016;22(5):792-8.  
52  
53  
54  
55 38. Hennink MM, Kaiser BN, Marconi VC. Code saturation versus meaning saturation:  
56 how many interviews are enough? *Qual Health Res* 2017;27(4):591-608.  
57  
58  
59  
60

- 1  
2  
3 39. Hutchinson K, Ryder T, Coleman H, et al. Determining the role and responsibilities of  
4 the community epilepsy nurse in the management of epilepsy. *J clin Nurs* 2022.  
5  
6  
7 40. Rapport F, Francis-Auton E, Cartmill J, et al. A mobile methods pilot study of  
8 surgical spaces: ‘fit for purpose? Organisational productivity and workforce wellbeing in  
9 workspaces in hospital’ (FLOURISH). *BMC Health Serv Res* 2020;20(1):78.  
10  
11  
12 41. Braun V, Clarke V. Reflecting on reflexive thematic analysis. *Qualitative research in*  
13 *sport, exercise and health*. 2019;11(4):589-97.  
14  
15 42. Clarke V, Braun V. Thematic analysis. In: Michalos, A.C. (eds) *Encyclopaedia of*  
16 *quality of life and well-being research*. Netherlands: Springer; 2014.  
17  
18  
19  
20  
21  
22  
23  
24  
25  
26  
27  
28  
29  
30  
31  
32  
33  
34  
35  
36  
37  
38  
39  
40  
41  
42  
43  
44  
45  
46  
47  
48  
49  
50  
51  
52  
53  
54  
55  
56  
57  
58  
59  
60

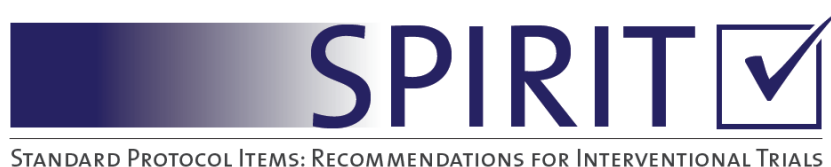

STANDARD PROTOCOL ITEMS: RECOMMENDATIONS FOR INTERVENTIONAL TRIALS

SPIRIT 2013 Checklist: Recommended items to address in a clinical trial protocol and related documents\*

| Section/item                      | Item No | Description                                                                                                                                                                                                                                                                              | Page No.        |
|-----------------------------------|---------|------------------------------------------------------------------------------------------------------------------------------------------------------------------------------------------------------------------------------------------------------------------------------------------|-----------------|
| <b>Administrative information</b> |         |                                                                                                                                                                                                                                                                                          |                 |
| Title                             | 1       | Descriptive title identifying the study design, population, interventions, and, if applicable, trial acronym                                                                                                                                                                             | 1               |
| Trial registration                | 2a      | Trial identifier and registry name. If not yet registered, name of intended registry                                                                                                                                                                                                     | N/A             |
|                                   | 2b      | All items from the World Health Organization Trial Registration Data Set                                                                                                                                                                                                                 | N/A             |
| Protocol version                  | 3       | Date and version identifier                                                                                                                                                                                                                                                              | Ethics protocol |
| Funding                           | 4       | Sources and types of financial, material, and other support                                                                                                                                                                                                                              | 23              |
| Roles and responsibilities        | 5a      | Names, affiliations, and roles of protocol contributors                                                                                                                                                                                                                                  | 1               |
|                                   | 5b      | Name and contact information for the trial sponsor                                                                                                                                                                                                                                       | N/A             |
|                                   | 5c      | Role of study sponsor and funders, if any, in study design; collection, management, analysis, and interpretation of data; writing of the report; and the decision to submit the report for publication, including whether they will have ultimate authority over any of these activities | 23              |
|                                   | 5d      | Composition, roles, and responsibilities of the coordinating centre, steering committee, endpoint adjudication committee, data management team, and other individuals or groups overseeing the trial, if applicable (see Item 21a for data monitoring committee)                         | 23              |
| <b>Introduction</b>               |         |                                                                                                                                                                                                                                                                                          |                 |
| Background and rationale          | 6a      | Description of research question and justification for undertaking the trial, including summary of relevant studies (published and unpublished) examining benefits and harms for each intervention                                                                                       | 4-6             |
|                                   | 6b      | Explanation for choice of comparators                                                                                                                                                                                                                                                    | N/A             |
| Objectives                        | 7       | Specific objectives or hypotheses                                                                                                                                                                                                                                                        | 6               |

|    |                                                                     |     |                                                                                                                                                                                                                                                                                                                                                                                |       |
|----|---------------------------------------------------------------------|-----|--------------------------------------------------------------------------------------------------------------------------------------------------------------------------------------------------------------------------------------------------------------------------------------------------------------------------------------------------------------------------------|-------|
| 1  |                                                                     |     |                                                                                                                                                                                                                                                                                                                                                                                |       |
| 2  | Trial design                                                        | 8   | Description of trial design including type of trial (eg, parallel group, crossover, factorial, single group), allocation ratio, and framework (eg, superiority, equivalence, noninferiority, exploratory)                                                                                                                                                                      | 6-7   |
| 3  |                                                                     |     |                                                                                                                                                                                                                                                                                                                                                                                |       |
| 4  |                                                                     |     |                                                                                                                                                                                                                                                                                                                                                                                |       |
| 5  |                                                                     |     |                                                                                                                                                                                                                                                                                                                                                                                |       |
| 6  |                                                                     |     |                                                                                                                                                                                                                                                                                                                                                                                |       |
| 7  |                                                                     |     |                                                                                                                                                                                                                                                                                                                                                                                |       |
| 8  | <b>Methods: Participants, interventions, and outcomes</b>           |     |                                                                                                                                                                                                                                                                                                                                                                                |       |
| 9  |                                                                     |     |                                                                                                                                                                                                                                                                                                                                                                                |       |
| 10 | Study setting                                                       | 9   | Description of study settings (eg, community clinic, academic hospital) and list of countries where data will be collected. Reference to where list of study sites can be obtained                                                                                                                                                                                             | 7     |
| 11 |                                                                     |     |                                                                                                                                                                                                                                                                                                                                                                                |       |
| 12 |                                                                     |     |                                                                                                                                                                                                                                                                                                                                                                                |       |
| 13 |                                                                     |     |                                                                                                                                                                                                                                                                                                                                                                                |       |
| 14 | Eligibility criteria                                                | 10  | Inclusion and exclusion criteria for participants. If applicable, eligibility criteria for study centres and individuals who will perform the interventions (eg, surgeons, psychotherapists)                                                                                                                                                                                   | 7-8   |
| 15 |                                                                     |     |                                                                                                                                                                                                                                                                                                                                                                                |       |
| 16 |                                                                     |     |                                                                                                                                                                                                                                                                                                                                                                                |       |
| 17 |                                                                     |     |                                                                                                                                                                                                                                                                                                                                                                                |       |
| 18 |                                                                     |     |                                                                                                                                                                                                                                                                                                                                                                                |       |
| 19 | Interventions                                                       | 11a | Interventions for each group with sufficient detail to allow replication, including how and when they will be administered                                                                                                                                                                                                                                                     | 8-12  |
| 20 |                                                                     |     |                                                                                                                                                                                                                                                                                                                                                                                |       |
| 21 |                                                                     |     |                                                                                                                                                                                                                                                                                                                                                                                |       |
| 22 |                                                                     | 11b | Criteria for discontinuing or modifying allocated interventions for a given trial participant (eg, drug dose change in response to harms, participant request, or improving/worsening disease)                                                                                                                                                                                 | N/A   |
| 23 |                                                                     |     |                                                                                                                                                                                                                                                                                                                                                                                |       |
| 24 |                                                                     |     |                                                                                                                                                                                                                                                                                                                                                                                |       |
| 25 |                                                                     |     |                                                                                                                                                                                                                                                                                                                                                                                |       |
| 26 |                                                                     | 11c | Strategies to improve adherence to intervention protocols, and any procedures for monitoring adherence (eg, drug tablet return, laboratory tests)                                                                                                                                                                                                                              | 9-12  |
| 27 |                                                                     |     |                                                                                                                                                                                                                                                                                                                                                                                |       |
| 28 |                                                                     |     |                                                                                                                                                                                                                                                                                                                                                                                |       |
| 29 |                                                                     |     |                                                                                                                                                                                                                                                                                                                                                                                |       |
| 30 |                                                                     |     |                                                                                                                                                                                                                                                                                                                                                                                |       |
| 31 |                                                                     | 11d | Relevant concomitant care and interventions that are permitted or prohibited during the trial                                                                                                                                                                                                                                                                                  | N/A   |
| 32 |                                                                     |     |                                                                                                                                                                                                                                                                                                                                                                                |       |
| 33 |                                                                     |     |                                                                                                                                                                                                                                                                                                                                                                                |       |
| 34 | Outcomes                                                            | 12  | Primary, secondary, and other outcomes, including the specific measurement variable (eg, systolic blood pressure), analysis metric (eg, change from baseline, final value, time to event), method of aggregation (eg, median, proportion), and time point for each outcome. Explanation of the clinical relevance of chosen efficacy and harm outcomes is strongly recommended | 13-17 |
| 35 |                                                                     |     |                                                                                                                                                                                                                                                                                                                                                                                |       |
| 36 |                                                                     |     |                                                                                                                                                                                                                                                                                                                                                                                |       |
| 37 |                                                                     |     |                                                                                                                                                                                                                                                                                                                                                                                |       |
| 38 |                                                                     |     |                                                                                                                                                                                                                                                                                                                                                                                |       |
| 39 |                                                                     |     |                                                                                                                                                                                                                                                                                                                                                                                |       |
| 40 |                                                                     |     |                                                                                                                                                                                                                                                                                                                                                                                |       |
| 41 |                                                                     |     |                                                                                                                                                                                                                                                                                                                                                                                |       |
| 42 |                                                                     |     |                                                                                                                                                                                                                                                                                                                                                                                |       |
| 43 | Participant timeline                                                | 13  | Time schedule of enrolment, interventions (including any run-ins and washouts), assessments, and visits for participants. A schematic diagram is highly recommended (see Figure)                                                                                                                                                                                               | 16-17 |
| 44 |                                                                     |     |                                                                                                                                                                                                                                                                                                                                                                                |       |
| 45 |                                                                     |     |                                                                                                                                                                                                                                                                                                                                                                                |       |
| 46 |                                                                     |     |                                                                                                                                                                                                                                                                                                                                                                                |       |
| 47 |                                                                     |     |                                                                                                                                                                                                                                                                                                                                                                                |       |
| 48 | Sample size                                                         | 14  | Estimated number of participants needed to achieve study objectives and how it was determined, including clinical and statistical assumptions supporting any sample size calculations                                                                                                                                                                                          | 17-18 |
| 49 |                                                                     |     |                                                                                                                                                                                                                                                                                                                                                                                |       |
| 50 |                                                                     |     |                                                                                                                                                                                                                                                                                                                                                                                |       |
| 51 |                                                                     |     |                                                                                                                                                                                                                                                                                                                                                                                |       |
| 52 |                                                                     |     |                                                                                                                                                                                                                                                                                                                                                                                |       |
| 53 |                                                                     |     |                                                                                                                                                                                                                                                                                                                                                                                |       |
| 54 | Recruitment                                                         | 15  | Strategies for achieving adequate participant enrolment to reach target sample size                                                                                                                                                                                                                                                                                            | 17-18 |
| 55 |                                                                     |     |                                                                                                                                                                                                                                                                                                                                                                                |       |
| 56 |                                                                     |     |                                                                                                                                                                                                                                                                                                                                                                                |       |
| 57 | <b>Methods: Assignment of interventions (for controlled trials)</b> |     |                                                                                                                                                                                                                                                                                                                                                                                |       |
| 58 |                                                                     |     |                                                                                                                                                                                                                                                                                                                                                                                |       |
| 59 | Allocation:                                                         |     |                                                                                                                                                                                                                                                                                                                                                                                |       |
| 60 |                                                                     |     |                                                                                                                                                                                                                                                                                                                                                                                |       |

|    |                                                           |     |                                                                    |       |
|----|-----------------------------------------------------------|-----|--------------------------------------------------------------------|-------|
| 1  |                                                           |     |                                                                    |       |
| 2  | Sequence                                                  | 16a | Method of generating the allocation sequence (eg, computer-        | N/A   |
| 3  | generation                                                |     | generated random numbers), and list of any factors for             |       |
| 4  |                                                           |     | stratification. To reduce predictability of a random sequence,     |       |
| 5  |                                                           |     | details of any planned restriction (eg, blocking) should be        |       |
| 6  |                                                           |     | provided in a separate document that is unavailable to those       |       |
| 7  |                                                           |     | who enrol participants or assign interventions                     |       |
| 8  |                                                           |     |                                                                    |       |
| 9  |                                                           |     |                                                                    |       |
| 10 | Allocation                                                | 16b | Mechanism of implementing the allocation sequence (eg,             | N/A   |
| 11 | concealment                                               |     | central telephone; sequentially numbered, opaque, sealed           |       |
| 12 | mechanism                                                 |     | envelopes), describing any steps to conceal the sequence           |       |
| 13 |                                                           |     | until interventions are assigned                                   |       |
| 14 |                                                           |     |                                                                    |       |
| 15 | Implementation                                            | 16c | Who will generate the allocation sequence, who will enrol          | N/A   |
| 16 |                                                           |     | participants, and who will assign participants to interventions    |       |
| 17 |                                                           |     |                                                                    |       |
| 18 |                                                           |     |                                                                    |       |
| 19 | Blinding                                                  | 17a | Who will be blinded after assignment to interventions (eg, trial   | N/A   |
| 20 | (masking)                                                 |     | participants, care providers, outcome assessors, data              |       |
| 21 |                                                           |     | analysts), and how                                                 |       |
| 22 |                                                           |     |                                                                    |       |
| 23 |                                                           | 17b | If blinded, circumstances under which unblinding is                | N/A   |
| 24 |                                                           |     | permissible, and procedure for revealing a participant's           |       |
| 25 |                                                           |     | allocated intervention during the trial                            |       |
| 26 |                                                           |     |                                                                    |       |
| 27 |                                                           |     |                                                                    |       |
| 28 | <b>Methods: Data collection, management, and analysis</b> |     |                                                                    |       |
| 29 |                                                           |     |                                                                    |       |
| 30 | Data collection                                           | 18a | Plans for assessment and collection of outcome, baseline, and      | 15-17 |
| 31 | methods                                                   |     | other trial data, including any related processes to promote       |       |
| 32 |                                                           |     | data quality (eg, duplicate measurements, training of              |       |
| 33 |                                                           |     | assessors) and a description of study instruments (eg,             |       |
| 34 |                                                           |     | questionnaires, laboratory tests) along with their reliability and |       |
| 35 |                                                           |     | validity, if known. Reference to where data collection forms       |       |
| 36 |                                                           |     | can be found, if not in the protocol                               |       |
| 37 |                                                           |     |                                                                    |       |
| 38 |                                                           |     |                                                                    |       |
| 39 |                                                           | 18b | Plans to promote participant retention and complete follow-up,     | N/A   |
| 40 |                                                           |     | including list of any outcome data to be collected for             |       |
| 41 |                                                           |     | participants who discontinue or deviate from intervention          |       |
| 42 |                                                           |     | protocols                                                          |       |
| 43 |                                                           |     |                                                                    |       |
| 44 |                                                           |     |                                                                    |       |
| 45 | Data                                                      | 19  | Plans for data entry, coding, security, and storage, including     | 16-18 |
| 46 | management                                                |     | any related processes to promote data quality (eg, double data     |       |
| 47 |                                                           |     | entry; range checks for data values). Reference to where           |       |
| 48 |                                                           |     | details of data management procedures can be found, if not in      |       |
| 49 |                                                           |     | the protocol                                                       |       |
| 50 |                                                           |     |                                                                    |       |
| 51 |                                                           |     |                                                                    |       |
| 52 | Statistical                                               | 20a | Statistical methods for analysing primary and secondary            | 18-19 |
| 53 | methods                                                   |     | outcomes. Reference to where other details of the statistical      |       |
| 54 |                                                           |     | analysis plan can be found, if not in the protocol                 |       |
| 55 |                                                           |     |                                                                    |       |
| 56 |                                                           | 20b | Methods for any additional analyses (eg, subgroup and              | N/A   |
| 57 |                                                           |     | adjusted analyses)                                                 |       |
| 58 |                                                           |     |                                                                    |       |
| 59 |                                                           |     |                                                                    |       |
| 60 |                                                           |     |                                                                    |       |



|                                 |     |                                                                                                                                                                                                                                                                                                                                       |                 |
|---------------------------------|-----|---------------------------------------------------------------------------------------------------------------------------------------------------------------------------------------------------------------------------------------------------------------------------------------------------------------------------------------|-----------------|
|                                 | 20c | Definition of analysis population relating to protocol non-adherence (eg, as randomised analysis), and any statistical methods to handle missing data (eg, multiple imputation)                                                                                                                                                       | N/A             |
| <b>Methods: Monitoring</b>      |     |                                                                                                                                                                                                                                                                                                                                       |                 |
| Data monitoring                 | 21a | Composition of data monitoring committee (DMC); summary of its role and reporting structure; statement of whether it is independent from the sponsor and competing interests; and reference to where further details about its charter can be found, if not in the protocol. Alternatively, an explanation of why a DMC is not needed | N/A             |
|                                 | 21b | Description of any interim analyses and stopping guidelines, including who will have access to these interim results and make the final decision to terminate the trial                                                                                                                                                               | N/A             |
| Harms                           | 22  | Plans for collecting, assessing, reporting, and managing solicited and spontaneously reported adverse events and other unintended effects of trial interventions or trial conduct                                                                                                                                                     | Ethics protocol |
| Auditing                        | 23  | Frequency and procedures for auditing trial conduct, if any, and whether the process will be independent from investigators and the sponsor                                                                                                                                                                                           | N/A             |
| <b>Ethics and dissemination</b> |     |                                                                                                                                                                                                                                                                                                                                       |                 |
| Research ethics approval        | 24  | Plans for seeking research ethics committee/institutional review board (REC/IRB) approval                                                                                                                                                                                                                                             | 22              |
| Protocol amendments             | 25  | Plans for communicating important protocol modifications (eg, changes to eligibility criteria, outcomes, analyses) to relevant parties (eg, investigators, REC/IRBs, trial participants, trial registries, journals, regulators)                                                                                                      | 22              |
| Consent or assent               | 26a | Who will obtain informed consent or assent from potential trial participants or authorised surrogates, and how (see Item 32)                                                                                                                                                                                                          | 13, 22          |
|                                 | 26b | Additional consent provisions for collection and use of participant data and biological specimens in ancillary studies, if applicable                                                                                                                                                                                                 | N/A             |
| Confidentiality                 | 27  | How personal information about potential and enrolled participants will be collected, shared, and maintained in order to protect confidentiality before, during, and after the trial                                                                                                                                                  | 22              |
| Declaration of interests        | 28  | Financial and other competing interests for principal investigators for the overall trial and each study site                                                                                                                                                                                                                         | 22              |
| Access to data                  | 29  | Statement of who will have access to the final trial dataset, and disclosure of contractual agreements that limit such access for investigators                                                                                                                                                                                       | 22              |

|    |                   |     |                                                                      |                 |
|----|-------------------|-----|----------------------------------------------------------------------|-----------------|
| 1  |                   |     |                                                                      |                 |
| 2  | Ancillary and     | 30  | Provisions, if any, for ancillary and post-trial care, and for       | Ethics protocol |
| 3  | post-trial care   |     | compensation to those who suffer harm from trial participation       |                 |
| 4  |                   |     |                                                                      |                 |
| 5  | Dissemination     | 31a | Plans for investigators and sponsor to communicate trial             | Ethics protocol |
| 6  | policy            |     | results to participants, healthcare professionals, the public,       |                 |
| 7  |                   |     | and other relevant groups (eg, via publication, reporting in         |                 |
| 8  |                   |     | results databases, or other data sharing arrangements),              |                 |
| 9  |                   |     | including any publication restrictions                               |                 |
| 10 |                   |     |                                                                      |                 |
| 11 |                   | 31b | Authorship eligibility guidelines and any intended use of            | N/A             |
| 12 |                   |     | professional writers                                                 |                 |
| 13 |                   |     |                                                                      |                 |
| 14 |                   | 31c | Plans, if any, for granting public access to the full protocol,      | N/A             |
| 15 |                   |     | participant-level dataset, and statistical code                      |                 |
| 16 |                   |     |                                                                      |                 |
| 17 |                   |     |                                                                      |                 |
| 18 |                   |     |                                                                      |                 |
| 19 | <b>Appendices</b> |     |                                                                      |                 |
| 20 |                   |     |                                                                      |                 |
| 21 | Informed consent  | 32  | Model consent form and other related documentation given to          | Ethics protocol |
| 22 | materials         |     | participants and authorised surrogates                               |                 |
| 23 |                   |     |                                                                      |                 |
| 24 | Biological        | 33  | Plans for collection, laboratory evaluation, and storage of          | N/A             |
| 25 | specimens         |     | biological specimens for genetic or molecular analysis in the        |                 |
| 26 |                   |     | current trial and for future use in ancillary studies, if applicable |                 |
| 27 |                   |     |                                                                      |                 |

\*It is strongly recommended that this checklist be read in conjunction with the SPIRIT 2013 Explanation & Elaboration for important clarification on the items. Amendments to the protocol should be tracked and dated. The SPIRIT checklist is copyrighted by the SPIRIT Group under the Creative Commons "[Attribution-NonCommercial-NoDerivs 3.0 Unported](https://creativecommons.org/licenses/by-nc-nd/3.0/)" license.

Reference: Chan A-W, Tetzlaff JM, Altman DG, Laupacis A, Gøtzsche PC, Krleža-Jerić K, Hróbjartsson A, Mann H, Dickersin K, Berlin J, Doré C, Parulekar W, Summerskill W, Groves T, Schulz K, Sox H, Rockhold FW, Rennie D, Moher D. SPIRIT 2013 Statement: Defining standard protocol items for clinical trials. *Ann Intern Med.* 2013;158(3):200-207.



## PROSTATE CANCER DISTRESS SCREEN

The experience of prostate cancer is for many men a difficult time. I would like to ask you a few brief questions to check how you have been feeling and ask about your main concerns. Thinking about how you have been feeling over the past week including today, how distressed do you feel on a scale of '0', no distress to '10', extreme distress? (circle)



No distress

Extreme distress

This is a list of problems that some men with prostate cancer experience. Do any of these problems apply to you? (Read the list below, tick if yes)

### Practical Problems

- Work
- Financial/Insurance

### Family Problems

- Partner

### Emotional Problems

- Depression
- Uncertainty about the future
- Nervousness
- Sadness
- Worry
- Loss of interest in usual activities

### Treatment Problems

- Understanding treatments
- Making a decision
- Information about my illness

### Physical Problems

- Pain
- Fatigue
- Sexual
- Urinary
- Bowel
- Hot Flashes
- Weight Gain
- Weight Loss
- Loss of Muscle Mass
- Memory/Concentration
- Sleep

### Other Problems (please list)

---



---



---

Which of these are the **most important concerns** for you right now? (Please list)

---

Which of these concerns would you like help with?

---

For men with a rating of  $\geq 4$  consider further assessment and referral to appropriate support services.

Person completing form:

Date: \_\_\_ / \_\_\_ / \_\_\_

**ICIQ-UI-SF: CONFIDENTIAL**

Many people leak urine some of the time. We are trying to find out how many people leak urine, and how much this bothers them. We would be grateful if you could answer the following questions, thinking about how you have been, on average, over the PAST FOUR WEEKS.

**1. How often do you leak urine? (Tick one box)**

- never
- about once a week or less often
- two or three times a week
- about once a day
- several times a day
- all the time

**2. We would like to know how much urine you think leaks. How much urine do you usually leak (whether you wear protection or not)? (Tick one box)**

- none
- a small amount
- a moderate amount
- a large amount

**3. Overall how much does leaking urine interfere with your everyday life?**

*Please circle a number between 0 (not at all) and 10 (a great deal)*

- 0    1    2    3    4    5    6    7    8    9    10
- not at all a great deal

**4. When does urine leak? (Please tick all that apply to you)**

- never – urine does not leak
- leaks before you can get to the toilet
- leaks when you cough or sneeze
- leaks when you are asleep
- leaks when you are physically active/exercising
- leaks when you have finished urinating and are dressed
- leaks for no obvious reason
- leaks all the time

**Thank you very much for answering these questions.**

Copyright © “ICIQ Group”



### International Prostate Symptom Score (IPSS)

Patient Name: \_\_\_\_\_ Date of Birth: \_\_\_\_\_ Age: \_\_\_\_\_ Today's Date: \_\_\_\_\_

**Determine Your BPH Symptoms**      Circle your answers and add up your scores at the bottom.

| Over the past month                                                                                                                                       | Not at all | Less than one time in five | Less than half the time | About half the time | More than half the time | Almost always              |
|-----------------------------------------------------------------------------------------------------------------------------------------------------------|------------|----------------------------|-------------------------|---------------------|-------------------------|----------------------------|
| <b>Incomplete emptying-</b> How often have you had the sensation of not emptying your bladder completely after you finished urinating?                    | 0          | 1                          | 2                       | 3                   | 4                       | 5                          |
| <b>Frequency-</b> How often have you had to urinate again less than two hours after you finished urinating?                                               | 0          | 1                          | 2                       | 3                   | 4                       | 5                          |
| <b>Intermittency-</b> How often you have found you stopped and started again several times when you urinated?                                             | 0          | 1                          | 2                       | 3                   | 4                       | 5                          |
| <b>Urgency-</b> How often have you found it difficult to postpone urination?                                                                              | 0          | 1                          | 2                       | 3                   | 4                       | 5                          |
| <b>Weak stream-</b> How often have you had a weak urinary stream?                                                                                         | 0          | 1                          | 2                       | 3                   | 4                       | 5                          |
| <b>Straining-</b> How often have you had to push or strain to begin urination?                                                                            | 0          | 1                          | 2                       | 3                   | 4                       | 5                          |
| <b>Sleeping-</b> How many times did you most typically get up to urinate from the time you went to bed at night until the time you got up in the morning? | None<br>0  | One<br>Time<br>1           | Two<br>Times<br>2       | Three<br>Times<br>3 | Four<br>Times<br>4      | Five or More<br>Times<br>5 |
| <b>Add Symptom Scores:</b>                                                                                                                                |            | +                          | +                       | +                   | +                       | +                          |

**Total International Prostate Symptom Score=** \_\_\_\_\_

**1-7 mild symptoms   -   8-19 moderate symptoms   -   20-35 severe symptoms**

Regardless of the score, if your symptoms are bothersome you should notify your doctor.

| Quality of Life (QoL)                                                                                                         | Delighted | Pleased | Mostly Satisfied | Mixed | Mostly Dissatis- | Unhappy | Terrible |
|-------------------------------------------------------------------------------------------------------------------------------|-----------|---------|------------------|-------|------------------|---------|----------|
| If you were to spend the rest of your life with your urinary condition just the way it is now, how would you feel about that? | 0         | 1       | 2                | 3     | 4                | 5       | 6        |

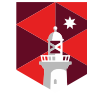

## Sexual Health Inventory for Men (SHIM)

### Instructions

Each question has five possible responses. Circle the number that best describes your own situation. Select only one answer for each question.

### Over the last six months:

---

**1. How do you rate your confidence that you could keep an erection?**

|          |     |          |      |           |
|----------|-----|----------|------|-----------|
| 1        | 2   | 3        | 4    | 5         |
| Very low | Low | Moderate | High | Very high |

---

**2. When you had erections with sexual stimulation, how often were your erections hard enough for penetration (entering your partner)?**

|                          |                                                  |                                       |                                            |                            |
|--------------------------|--------------------------------------------------|---------------------------------------|--------------------------------------------|----------------------------|
| 1                        | 2                                                | 3                                     | 4                                          | 5                          |
| Almost never<br>or never | A few times<br>(much less than<br>half the time) | Sometimes<br>(about half<br>the time) | Most times<br>(more than<br>half the time) | Almost always<br>or always |

---

**3. During sexual intercourse, how often were you able to maintain your erection after you had penetrated (entered) your partner?**

|                          |                                                  |                                       |                                            |                            |
|--------------------------|--------------------------------------------------|---------------------------------------|--------------------------------------------|----------------------------|
| 1                        | 2                                                | 3                                     | 4                                          | 5                          |
| Almost never<br>or never | A few times<br>(much less than<br>half the time) | Sometimes<br>(about half<br>the time) | Most times<br>(more than<br>half the time) | Almost always<br>or always |

---

**4. During sexual intercourse, how difficult was it to maintain your erection to completion of intercourse?**

|                        |                |           |                    |               |
|------------------------|----------------|-----------|--------------------|---------------|
| 1                      | 2              | 3         | 4                  | 5             |
| Extremely<br>difficult | Very difficult | Difficult | Slightly difficult | Not difficult |

---

**5. When you attempted sexual intercourse, how often was it satisfactory for you?**

|                          |                                                  |                                       |                                            |                            |
|--------------------------|--------------------------------------------------|---------------------------------------|--------------------------------------------|----------------------------|
| 1                        | 2                                                | 3                                     | 4                                          | 5                          |
| Almost never<br>or never | A few times<br>(much less than<br>half the time) | Sometimes<br>(about half<br>the time) | Most times<br>(more than<br>half the time) | Almost always<br>or always |

---

## SUPPLEMENTARY FILE 3

### Topic Guide: Staff interviews

|                               |                                                                                                                                                                                                                                 |
|-------------------------------|---------------------------------------------------------------------------------------------------------------------------------------------------------------------------------------------------------------------------------|
| <b>Title</b>                  | Implementation of evidence and consensus-based perioperative care pathways                                                                                                                                                      |
| <b>Principal Investigator</b> | Dr Mitchell Sarkies, Senior Research Fellow and NHMRC Emerging Leadership Fellow, Australian Institute of Health Innovation, Macquarie University<br><a href="mailto:mitchell.sarkies@mq.edu.au">mitchell.sarkies@mq.edu.au</a> |
| <b>Co-investigators</b>       | A/Prof Andrew Hirschhorn, Prof Jeffrey Braithwaite, Dr Gaston Arnolda, Dr Emilie Francis-Auton, Dr Janet Long, Ms Lisa Pagano                                                                                                   |

The semi-structured interviews will be conducted retrospectively for key clinical and non-clinical hospital staff who were previously involved in the development of perioperative pathways for the elective hip and knee replacement surgical cohorts; and prospectively for staff currently involved in the development and implementation of new pathways. The aims of the interview are to:

- Determine the experiences of staff involved in implementing standardised peri-operative pathways.
- Explore the stakeholder knowledge of the care pathways within the hospital setting.
- Assess the integrity, fidelity to and feasibility of the intervention.
- To understand the key barriers and facilitators to implementation of standardised peri-operative pathways from the perspective of both clinical and non-clinical hospital staff.
- To synthesize data from both patient groups to gain a broader understanding of how standardised care pathways are implemented and the impact of these pathways.

#### QUESTIONS:



1  
2  
3 *Thank you for taking part in this interview to examine the implementation of standardised*  
4 *peri-operative surgical pathways at Macquarie University Hospital. The questions will focus*  
5 *on your experiences, familiarity with the pathway, perspective on whether they're being*  
6 *adhered to, and any barriers or facilitators to their implementation.*

7  
8  
9  
10  
11 *Participation in this interview is voluntary and if at any time you do not wish to continue,*  
12 *please let me know. Participation or refusal to participate will not affect your employment.*

13  
14  
15 *With your permission, this interview will be audio recorded so that it can be transcribed and*  
16 *analysed. Do you have any questions before we start?*

17  
18  
19  
20  
21  
22 1. Demographic questions:

- 23  
24 - Can you please introduce yourself and your role at Macquarie University Hospital?  
25  
26 - How long have you worked in healthcare?  
27  
28 - How many of those have been at Macquarie University Hospital?  
29  
30

31  
32  
33  
34  
35  
36  
37 2. What was your experience/what has been your experience implementing the  
38 [SURGICAL COHORT] peri-operative pathway/s?  
39  
40  
41  
42  
43  
44  
45  
46  
47  
48

49 3. How familiar are you with the particulars of the clinical pathway/s? Can you talk  
50 through some of the changes from previous practice?  
51

- 52  
53 - What worked?  
54  
55 - What didn't work  
56  
57  
58  
59  
60



1  
2  
3 4. What are your views on the standardised clinical pathways that were  
4  
5 implemented/are being implemented?  
6

- 7  
8 - Strengths  
9  
10 - Weaknesses  
11

12  
13  
14  
15  
16  
17  
18 5. Did you and other clinicians tend to follow the new processes/procedures?  
19

- 20 - Why do think that is?  
21  
22

23  
24  
25 6. What challenges, if any, did you encounter in implementing the clinical pathways?  
26  
27  
28  
29

30 Prompts;

- 31  
32 - Workload and time  
33  
34 - Staffing  
35  
36 - Personal preference/views  
37  
38 - Inter-professional collaboration  
39  
40 - Other  
41  
42  
43  
44

45 7. What was important to facilitating the implementation of the clinical pathways?  
46  
47  
48  
49

50 Prompts;

- 51  
52 - Organisation  
53  
54 - Resources  
55  
56 - Staffing/Inter-professional collaboration  
57  
58 - Support/Monitoring of fidelity/quality  
59  
60

1  
2  
3 - Other  
4  
5  
6  
7

8 8. Were there any other lessons learned about implementing standardised clinical  
9 pathways?  
10  
11  
12  
13  
14  
15  
16

17 *Additional probing question:*  
18

19 9. What are your suggestions to improve future implementation of standardised clinical  
20 pathways for [SURGICAL COHORT] surgery?  
21  
22  
23  
24  
25  
26  
27  
28  
29

30 10. What do you see as the effects and value of implementing standardised clinical  
31 pathways for [SURGICAL COHORT] surgery?  
32  
33  
34  
35  
36  
37  
38  
39  
40

41 11. Overall, how feasible is/was it to implement standardised clinical pathways for  
42 [SURGICAL COHORT] surgery at Macquarie University Hospital or private hospital  
43 settings more generally?  
44  
45  
46  
47  
48  
49  
50  
51  
52  
53  
54

55 12. Is there anything else you would like to add that has not been covered here?  
56  
57  
58  
59  
60

## SUPPLEMENTARY FILE 4

### Topic Guide: Surgeons

|                               |                                                                                                                                                                                                                                 |
|-------------------------------|---------------------------------------------------------------------------------------------------------------------------------------------------------------------------------------------------------------------------------|
| <b>Title</b>                  | Implementation of evidence and consensus-based perioperative care pathways                                                                                                                                                      |
| <b>Principal Investigator</b> | Dr Mitchell Sarkies, Senior Research Fellow and NHMRC Emerging Leadership Fellow, Australian Institute of Health Innovation, Macquarie University<br><a href="mailto:mitchell.sarkies@mq.edu.au">mitchell.sarkies@mq.edu.au</a> |
| <b>Co-investigators</b>       | A/Prof Andrew Hirschhorn, Prof Jeffrey Braithwaite, Dr Gaston Arnolda, Dr Emilie Francis-Auton, Dr Janet Long, Ms Lisa Pagano                                                                                                   |

The semi-structured interviews will be conducted retrospectively for key clinical and non-clinical hospital staff who were previously involved in the development of perioperative pathways for the elective hip and knee replacement surgical cohorts; and prospectively for staff currently involved in the development and implementation of new pathways. The aims of the interview are to:

- Determine the experiences of staff involved in implementing standardised perioperative pathways.
- Explore the stakeholder knowledge of the care pathways within the hospital setting.
- Assess the integrity, fidelity to and feasibility of the intervention.
- To understand the key barriers and facilitators to implementation of standardised peri-operative pathways from the perspective of both clinical and non-clinical hospital staff.
- To synthesize data from both patient groups to gain a broader understanding of how standardised care pathways are implemented and the impact of these pathways.

#### QUESTIONS:

1. Demographic questions:
  - Can you please introduce yourself and your role at Macquarie University Hospital?
  - How long have you worked in healthcare?
  - How many of those have been at Macquarie University Hospital?

- 1  
2  
3  
4  
5  
6  
7  
8  
9  
10  
11  
12  
13  
14  
15  
16  
17  
18  
19  
20  
21  
22  
23  
24  
25  
26  
27  
28  
29  
30  
31  
32  
33  
34  
35  
36  
37  
38  
39  
40  
41  
42  
43
- *Can ask further about elements of their role as needed*
2. What was your experience/what has been your experience implementing the [SURGICAL COHORT] peri-operative pathway/s?
3. How familiar are you with the particulars of the clinical pathway/s? Can you talk through some of the changes from previous practice?
- What worked?
  - What didn't work?
4. What are your views on the standardised clinical pathways that were implemented/are being implemented?
- Strengths
  - Weaknesses
5. What are your perceptions of why MQ health was looking to standardise pathways?  
Alternate question - What do you think about the organisation's approach to try to reduce clinical variation through standardising clinical pathways?

44 Prompt – do you see clinical variation as being an issue?

- 45  
46  
47  
48  
49  
50  
51  
52
6. Option 1: What challenges, if any, did you encounter in implementing the clinical pathways?

53  
54  
55  
56  
57

Option 2: What challenges do you think clinicians would face when attempting to implement consensus-based clinical pathways?

58 Prompts;

- 59  
60
- Workload and time

- 1
  - 2
  - 3
  - 4
  - 5
  - 6
  - 7
  - 8
  - 9
  - 10
  - 11
  - 12
  - 13
  - 14
  - 15
  - 16
  - 17
  - 18
  - 19
  - 20
  - 21
  - 22
  - 23
  - 24
  - 25
  - 26
  - 27
  - 28
  - 29
  - 30
  - 31
  - 32
  - 33
  - 34
  - 35
  - 36
  - 37
  - 38
  - 39
  - 40
  - 41
  - 42
  - 43
  - 44
  - 45
  - 46
  - 47
  - 48
  - 49
  - 50
  - 51
  - 52
  - 53
  - 54
  - 55
  - 56
  - 57
  - 58
  - 59
  - 60
- Staffing
  - Personal preference/views/autonomy
  - Inter-professional collaboration
  - Other

7. Option 1: What was important to facilitating the implementation of the clinical pathways?

Prompts;

- Organisation
- Resources
- Staffing/Inter-professional collaboration
- Support/Monitoring of fidelity/quality
- Other

8. What do you see as the effects and value of implementing standardised clinical pathways for [SURGICAL COHORT] surgery?

9. How would you measure the success of a clinical pathway of the [SURGICAL] clinical cohort?

10. Overall, how feasible is/was it to implement standardised clinical pathways for [SURGICAL COHORT] surgery at Macquarie University Hospital or private hospital settings more generally?

11. Is there anything else you would like to add that has not been covered here?
