# Supplementary material for: Implementation of consensus-based perioperative care pathways to reduce clinical variation for elective surgery in an Australian private hospital: a mixed-methods pre–post study protocol
Source: PubMed Central journal article supplement — BMJ Open. 2023 Jul 26;13(7):e075008. doi: 10.1136/bmjopen-2023-075008 (PMC10373689; doi:10.1136/bmjopen-2023-075008), 2023-07-26
Supplement: bmjopen-2023-075008supp003.pdf [file bmjopen-2023-075008supp003.pdf]

## SUPPLEMENTARY FILE 3

### Topic Guide: Staff interviews

|                               |                                                                                                                                                                                                                                 |
|-------------------------------|---------------------------------------------------------------------------------------------------------------------------------------------------------------------------------------------------------------------------------|
| <b>Title</b>                  | Implementation of evidence and consensus-based perioperative care pathways                                                                                                                                                      |
| <b>Principal Investigator</b> | Dr Mitchell Sarkies, Senior Research Fellow and NHMRC Emerging Leadership Fellow, Australian Institute of Health Innovation, Macquarie University<br><a href="mailto:mitchell.sarkies@mq.edu.au">mitchell.sarkies@mq.edu.au</a> |
| <b>Co-investigators</b>       | A/Prof Andrew Hirschhorn, Prof Jeffrey Braithwaite, Dr Gaston Arnolda, Dr Emilie Francis-Auton, Dr Janet Long, Ms Lisa Pagano                                                                                                   |

The semi-structured interviews will be conducted retrospectively for key clinical and non-clinical hospital staff who were previously involved in the development of perioperative pathways for the elective hip and knee replacement surgical cohorts; and prospectively for staff currently involved in the development and implementation of new pathways. The aims of the interview are to:

- Determine the experiences of staff involved in implementing standardised peri-operative pathways.
- Explore the stakeholder knowledge of the care pathways within the hospital setting.
- Assess the integrity, fidelity to and feasibility of the intervention.
- To understand the key barriers and facilitators to implementation of standardised peri-operative pathways from the perspective of both clinical and non-clinical hospital staff.
- To synthesize data from both patient groups to gain a broader understanding of how standardised care pathways are implemented and the impact of these pathways.

#### QUESTIONS:

*Thank you for taking part in this interview to examine the implementation of standardised peri-operative surgical pathways at Macquarie University Hospital. The questions will focus on your experiences, familiarity with the pathway, perspective on whether they're being adhered to, and any barriers or facilitators to their implementation.*

*Participation in this interview is voluntary and if at any time you do not wish to continue, please let me know. Participation or refusal to participate will not affect your employment.*

*With your permission, this interview will be audio recorded so that it can be transcribed and analysed. Do you have any questions before we start?*

1. Demographic questions:

- Can you please introduce yourself and your role at Macquarie University Hospital?
- How long have you worked in healthcare?
- How many of those have been at Macquarie University Hospital?

2. What was your experience/what has been your experience implementing the [SURGICAL COHORT] peri-operative pathway/s?

3. How familiar are you with the particulars of the clinical pathway/s? Can you talk through some of the changes from previous practice?

- What worked?
- What didn't work

4. What are your views on the standardised clinical pathways that were implemented/are being implemented?
  - Strengths
  - Weaknesses
  
5. Did you and other clinicians tend to follow the new processes/procedures?
  - Why do think that is?
  
6. What challenges, if any, did you encounter in implementing the clinical pathways?

Prompts;

- Workload and time
- Staffing
- Personal preference/views
- Inter-professional collaboration
- Other

7. What was important to facilitating the implementation of the clinical pathways?

Prompts;

- Organisation
- Resources
- Staffing/Inter-professional collaboration
- Support/Monitoring of fidelity/quality

- Other

8. Were there any other lessons learned about implementing standardised clinical pathways?

*Additional probing question:*

9. What are your suggestions to improve future implementation of standardised clinical pathways for [SURGICAL COHORT] surgery?

10. What do you see as the effects and value of implementing standardised clinical pathways for [SURGICAL COHORT] surgery?

11. Overall, how feasible is/was it to implement standardised clinical pathways for [SURGICAL COHORT] surgery at Macquarie University Hospital or private hospital settings more generally?

12. Is there anything else you would like to add that has not been covered here?
